# Supplementary material for: Quantifying Mosaic Development: Towards an Evo-Devo Postmodern Synthesis of the Evolution of Development via Differentiation Trees of Embryos
Source: Preprints.org preprint supplement (doi:10.20944/preprints201608.0108.v1), 2016-08-10
Supplement: Supplementary file 1 [file Supplemental-Table-S1.docx]

**Supplemental Table S1.** Embryo volume per cell stage of embryogenesis for *Ciona*. Volume (measured in cubic microns) is averaged over a number of observations (*N*). Data is graphed in Figure 1.

| **Cell Stage** | ***N*** | **Volume (µm3)** |
| --- | --- | --- |
| 2 | 1 | 2136600 |
| 4 | 1 | 2819884 |
| 8 | 2 | 2316572 |
| 16 | 4 | 1747595 |
| 24 | 1 | 1771553 |
| 32 | 13 | 1648322 |
| 44 | 4 | 1989783 |
| 64 | 3 | 1456609 |
| 76 | 3 | 2572317 |
| 112 | 6 | 1965414 |
