# Supplementary material for: Quantifying Mosaic Development: Towards an Evo-Devo Postmodern Synthesis of the Evolution of Development via Differentiation Trees of Embryos
Source: Preprints.org preprint supplement (doi:10.20944/preprints201608.0108.v1), 2016-08-10
Supplement: Supplementary file 4 [file Supplemental-Table-S2.xlsx]

## Sheet: C-intestinalis CIs
Daughters by Stage of Embryogenesis								Confidence Intervals (exceeded = 1)
Cell ID	Cell Stage	Cell Volume: Embryo Volume	Cell ID	Cell Stage	Cell Volume: Embryo Volume	Daughter pair	Difference (vol) between daughters	Confidence Interval (0.05)	Confidence Interval (0.25)	Confidence Interval (0.50)
AB2	2	50.8351	A3	4	25.1749	1	0.3029
AB2	2	50.8351	B3	4	25.4778
AB2*	2	49.1649	A3*	4	24.5305	2	0.2863
AB2*	2	49.1649	B3*	4	24.8168
Cell ID	Cell Stage	Cell Volume: Embryo Volume	Cell ID	Cell Stage	Cell Volume: Embryo Volume	Daughter pair	Difference (vol) between daughters	Confidence Interval (0.05)	Confidence Interval (0.25)	Confidence Interval (0.50)
A3	4	25.1749	A4.1	8	14.6052	1	4.3891	1	1
A3	4	25.1749	a4.2	8	10.2161
A3*	4	24.5305	A4.1*	8	15.3272	2	4.8245	1	1
A3*	4	24.5305	a4.2*	8	10.5027
B3	4	25.4778	B4.1	8	12.7686	3	2.1084	1
B3	4	25.4778	b4.2	8	10.6602
B3*	4	24.8168	B4.1*	8	13.6337	4	1.3475	1
B3*	4	24.8168	b4.2*	8	12.2862
Cell ID	Cell Stage	Cell Volume: Embryo Volume	Cell ID	Cell Stage	Cell Volume: Embryo Volume	Daughter pair	Difference (vol) between daughters	Confidence Interval (0.05)	Confidence Interval (0.25)	Confidence Interval (0.50)
A4.1	8	14.6052	A5.1	16	6.41059	1	0.12747
A4.1	8	14.6052	A5.2	16	6.28312
a4.2	8	10.2161	a5.3	16	4.27923	2	0.50225	1
a4.2	8	10.2161	a5.4	16	4.78148
A4.1*	8	15.3272	A5.1*	16	6.6901	3	0.46987	1
A4.1*	8	15.3272	A5.2*	16	7.15997
a4.2*	8	10.5027	a5.3*	16	4.4182	4	0.67182	1
a4.2*	8	10.5027	a5.4*	16	5.09002
B4.1	8	12.7686	B5.1	16	11.1381	5	7.20263	1	1	1
B4.1	8	12.7686	B5.2	16	3.93547
b4.2	8	10.6602	b5.3	16	5.47651	6	0.87263	1
b4.2	8	10.6602	b5.4	16	6.34914
B4.1*	8	13.6337	B5.1*	16	12.1004	7	8.1702	1	1	1
B4.1*	8	13.6337	B5.2*	16	3.9302
b4.2*	8	12.2862	b5.3*	16	5.0041	8	1.9493	1	1
b4.2*	8	12.2862	b5.4*	16	6.9534
Cell ID	Cell Stage	Cell Volume: Embryo Volume	Cell ID	Cell Stage	Cell Volume: Embryo Volume	Daughter pair	Difference (vol) between daughters	Confidence Interval (0.05)	Confidence Interval (0.25)	Confidence Interval (0.50)
A5.1	16	6.41059	A6.1	24	2.62961	1	0.5907	1
A5.1	16	6.41059	A6.2	24	3.22031
A5.2	16	6.28312	A6.3	24	3.6138	2	0.00291
A5.2	16	6.28312	A6.4	24	3.61671
a5.3	16	4.27923	a5.3	24	4.39217	N/A
a5.4	16	4.78148	a5.4	24	5.00587	N/A
A5.1*	16	6.6901	A6.1*	24	2.47644	3	0.97397	1	1
A5.1*	16	6.6901	A6.2*	24	3.45041
A5.2*	16	7.15997	A6.3*	24	3.78945	4	0.21715	1
A5.2*	16	7.15997	A6.4*	24	4.0066
a5.3*	16	4.4182	a5.3*	24	4.41687	N/A
a5.4*	16	5.09002	a5.4*	24	4.57772	N/A
B5.1	16	11.1381	B6.1	24	4.52053	5	1.018	1
B5.1	16	11.1381	B6.2	24	5.53853
B5.2	16	3.93547	B6.3	24	1.41437	6	2.54809	1	1	1
B5.2	16	3.93547	B6.4	24	3.96246
b5.3	16	5.47651	b5.3	24	5.80119	N/A
b5.4	16	6.34914	b5.4	24	5.8673	N/A
B5.1*	16	12.1004	B6.1*	24	4.77546	7	1.27883	1
B5.1*	16	12.1004	B6.2*	24	6.05429
B5.2*	16	3.9302	B6.3*	24	1.43249	8	2.25304	1	1	1
B5.2*	16	3.9302	B6.4*	24	3.68553
b5.3*	16	5.0041	b5.3*	24	5.30347	N/A
b5.4*	16	6.9534	b5.4*	24	6.44844	N/A
Cell ID	Cell Stage	Cell Volume: Embryo Volume	Cell ID	Cell Stage	Cell Volume: Embryo Volume	Daughter pair	Difference (vol) between daughters	Confidence Interval (0.05)	Confidence Interval (0.25)	Confidence Interval (0.50)
A6.1	24	2.62961	A6.1	32	2.8864	N/A
A6.2	24	3.22031	A6.2	32	2.94913	N/A
A6.3	24	3.6138	A6.3	32	3.15664	N/A
A6.4	24	3.61671	A6.4	32	3.02743	N/A
a5.3	24	4.39217	a6.5	32	2.01127	1	0.6436	1	1
a5.3	24	4.39217	a6.6	32	2.65487
a5.4	24	5.00587	a6.7	32	2.22926	2	1.09521	1	1
a5.4	24	5.00587	a6.8	32	3.32447
A6.1*	24	2.47644	A6.1*	32	3.22507	N/A
A6.2*	24	3.45041	A6.2*	32	2.90677	N/A
A6.3*	24	3.78945	A6.3*	32	3.19461	N/A
A6.4*	24	4.0066	A6.4*	32	3.07207	N/A
a5.3*	24	4.41687	a6.5*	32	2.11662	3	0.75753	1	1
a5.3*	24	4.41687	a6.6*	32	2.87415
a5.4*	24	4.57772	a6.7*	32	2.37935	4	0.96284	1	1
a5.4*	24	4.57772	a6.8*	32	3.34219
B6.1	24	4.52053	B6.1	32	4.20692	N/A
B6.2	24	5.53853	B6.2	32	5.64989	N/A
B6.3	24	1.41437	B6.3	32	0.913523	N/A
B6.4	24	3.96246	B6.4	32	3.16037	N/A
b5.3	24	5.80119	b6.5	32	2.77076	5	0.53073	1
b5.3	24	5.80119	b6.6	32	3.30149
b5.4	24	5.8673	b6.7	32	3.41863	6	0.46007	1
b5.4	24	5.8673	b6.8	32	3.8787
B6.1*	24	4.77546	B6.1*	32	4.21095	N/A
B6.2*	24	6.05429	B6.2*	32	5.74711	N/A
B6.3*	24	1.43249	B6.3*	32	0.805053	N/A
B6.4*	24	3.68553	B6.4*	32	3.29778	N/A
b5.3*	24	5.30347	b6.5*	32	2.93822	7	0.30348	1
b5.3*	24	5.30347	b6.6*	32	3.2417
b5.4*	24	6.44844	b6.7*	32	3.36267	8	0.38327	1
b5.4*	24	6.44844	b6.8*	32	3.74594
Cell ID	Cell Stage	Cell Volume: Embryo Volume	Cell ID	Cell Stage	Cell Volume: Embryo Volume	Daughter pair	Difference (vol) between daughters	Confidence Interval (0.05)	Confidence Interval (0.25)	Confidence Interval (0.50)
A6.1	32	2.8864	A7.1	44	1.3846	1	0.36753	1
A6.1	32	2.8864	A7.2	44	1.75213
A6.2	32	2.94913	A7.3	44	1.40571	2	0.14259	1
A6.2	32	2.94913	A7.4	44	1.26312
A6.3	32	3.15664	A7.5	44	1.6592	3	0.02902
A6.3	32	3.15664	A7.6	44	1.63018
A6.4	32	3.02743	A7.7	44	1.53255	4	0.12887	1
A6.4	32	3.02743	A7.8	44	1.66142
a6.5	32	2.01127	a6.5	44	1.67127	N/A
a6.6	32	2.65487	a6.6	44	2.74773	N/A
a6.7	32	2.22926	a6.7	44	2.67345	N/A
a6.8	32	3.32447	a6.8	44	3.10827	N/A
A6.1*	32	3.22507	A7.1*	44	1.47613	5	0.57038	1	1
A6.1*	32	3.22507	A7.2*	44	2.04651
A6.2*	32	2.90677	A7.3*	44	1.4918	6	0.16107	1
A6.2*	32	2.90677	A7.4*	44	1.33073
A6.3*	32	3.19461	A7.5*	44	1.80016	7	0.08325
A6.3*	32	3.19461	A7.6*	44	1.88341
A6.4*	32	3.07207	A7.7*	44	1.45687	8	0.2556	1
A6.4*	32	3.07207	A7.8*	44	1.71247
a6.5*	32	2.11662	a6.5*	44	1.73949	N/A
a6.6*	32	2.87415	a6.6*	44	2.80748	N/A
a6.7*	32	2.37935	a6.7*	44	2.2933	N/A
a6.8*	32	3.34219	a6.8*	44	3.25218	N/A
B6.1	32	4.20692	B7.1	44	1.70154	9	0.42434	1
B6.1	32	4.20692	B7.2	44	2.12588
B6.2	32	5.64989	B7.3	44	2.59447	10	1.40403	1	1
B6.2	32	5.64989	B7.4	44	3.9985
B6.3	32	0.913523	B6.3	44	0.939293	11	2.29057	1	1	1
B6.4	32	3.16037	B6.4	44	3.22986
b6.5	32	2.77076	b6.5	44	2.56499	N/A
b6.6	32	3.30149	b6.6	44	2.77787	N/A
b6.7	32	3.41863	b6.7	44	2.82296	N/A
b6.8	32	3.8787	b6.8	44	3.44044	N/A
B6.1*	32	4.21095	B7.1*	44	2.10547	12	0.1424	1
B6.1*	32	4.21095	B7.2*	44	2.24787
B6.2*	32	5.74711	B7.3*	44	3.01455	13	1.26294	1	1
B6.2*	32	5.74711	B7.4*	44	4.27749
B6.3*	32	0.805053	B6.3*	44	0.997758	14	2.2981	1	1	1
B6.4*	32	3.29778	B6.4*	44	3.29586
b6.5*	32	2.93822	b6.5*	44	3.22654	N/A
b6.6*	32	3.2417	b6.6*	44	2.54237	N/A
b6.7*	32	3.36267	b6.7*	44	3.07571	N/A
b6.8*	32	3.74594	b6.8*	44	3.24041	N/A
Cell ID	Cell Stage	Cell Volume: Embryo Volume	Cell ID	Cell Stage	Cell Volume: Embryo Volume	Daughter pair	Difference (vol) between daughters	Confidence Interval (0.05)	Confidence Interval (0.25)	Confidence Interval (0.50)
A7.1	44	1.3846	A7.1	64	2.13795	N/A
A7.2	44	1.75213	A7.2	64	1.79575	N/A
A7.3	44	1.40571	A7.3	64	0.506442	N/A
A7.4	44	1.26312	A7.4	64	0.513077	N/A
A7.5	44	1.6592	A7.5	64	0.863167	N/A
A7.6	44	1.63018	A7.6	64	0.647407	N/A
A7.7	44	1.53255	A7.7	64	0.65124	N/A
A7.8	44	1.66142	A7.8	64	0.515469	N/A
a6.5	44	1.67127	a7.9	64	0.117212	1	0.343726	1	1	1
a6.5	44	1.67127	a7.10	64	0.460938
a6.6	44	2.74773	a7.11	64	2.6444	2	0.35864	1
a6.6	44	2.74773	a7.12	64	3.00304
a6.7	44	2.67345	a7.13	64	1.97042	3	0.3254	1
a6.7	44	2.67345	a7.14	64	2.29582
a6.8	44	3.10827	a7.15	64	3.03335	4	0.30263	1
a6.8	44	3.10827	a7.16	64	2.73072
A7.1*	44	1.47613	A7.1*	64	0.362387	N/A
A7.2*	44	2.04651	A7.2*	64	0.529088	N/A
A7.3*	44	1.4918	A7.3*	64	1.40319	N/A
A7.4*	44	1.33073	A7.4*	64	1.23006	N/A
A7.5*	44	1.80016	A7.5*	64	0.22493	N/A
A7.6*	44	1.88341	A7.6*	64	0.722998	N/A
A7.7*	44	1.45687	A7.7*	64	0.331246	N/A
A7.8*	44	1.71247	A7.8*	64	1.19927	N/A
a6.5*	44	1.73949	a7.9*	64	0.462796	5	0.307968	1	1
a6.5*	44	1.73949	a7.10*	64	0.770764
a6.6*	44	2.80748	a7.11*	64	2.46114	6	0.06695
a6.6*	44	2.80748	a7.12*	64	2.52809
a6.7*	44	2.2933	a7.13*	64	2.18426	7	0.27414	1
a6.7*	44	2.2933	a7.14*	64	2.4584
a6.8*	44	3.25218	a7.15*	64	2.75233	8	0.17381	1
a6.8*	44	3.25218	a7.16*	64	2.57852
B7.1	44	1.70154	B7.1	64	1.88798	N/A
B7.2	44	2.12588	B7.2	64	1.11126	N/A
B6.3	44	0.939293	B7.3	64	1.12337	N/A
B7.3	44	2.59447	B7.5	64	0.986276	9	0.969697	1	1	1
B7.3	44	2.59447	B7.6	64	0.0165793
B6.4	44	3.22986	B7.4	64	2.38674	N/A
B7.4	44	3.9985	B7.7	64	1.86257	10	0.7228	1	1
B7.4	44	3.9985	B7.8	64	2.58537
b6.5	44	2.56499	b7.9	64	1.76719	11	1.41398	1	1	1
b6.5	44	2.56499	b7.10	64	3.18117
b6.6	44	2.77787	b7.11	64	0.723405	12	0.430885	1	1
b6.6	44	2.77787	b7.12	64	1.15429
b6.7	44	2.82296	b7.13	64	2.33272	13	0.44979	1
b6.7	44	2.82296	b7.14	64	2.78251
b6.8	44	3.44044	b7.15	64	2.38965	14	0.18055	1
b6.8	44	3.44044	b7.16	64	2.2091
B7.1*	44	2.10547	B7.1*	64	1.67839	N/A
B7.2*	44	2.24787	B7.2*	64	1.84928	N/A
B6.3*	44	0.997758	B7.3*	64	0.100713	N/A
B7.3*	44	3.01455	B7.5*	64	1.06284	15	0.886531	1	1	1
B7.3*	44	3.01455	B7.6*	64	0.176309
B6.4*	44	3.29586	B7.4*	64	1.20376	N/A
B7.4*	44	4.27749	B7.7*	64	1.785	16	0.97142	1	1
B7.4*	44	4.27749	B7.8*	64	2.75642
b6.5*	44	3.22654	b7.9*	64	0.93105	17	0.451257	1	1	1
b6.5*	44	3.22654	b7.10*	64	0.479793
b6.6*	44	2.54237	b7.11*	64	1.96341	18	0.35135	1
b6.6*	44	2.54237	b7.12*	64	2.31476
b6.7*	44	3.07571	b7.13*	64	3.08875	19	0.59101	1
b6.7*	44	3.07571	b7.14*	64	2.49774
b6.8*	44	3.24041	b7.15*	64	3.02394	20	2.52212	1	1	1
b6.8*	44	3.24041	b7.16*	64	0.501815
Cell ID	Cell Stage	Cell Volume: Embryo Volume	Cell ID	Cell Stage	Cell Volume: Embryo Volume	Daughter pair	Difference (vol) between daughters	Confidence Interval (0.05)	Confidence Interval (0.25)	Confidence Interval (0.50)
A7.1	64	2.13795	A7.1	76	1.59121	N/A
A7.2	64	1.79575	A7.2	76	2.10378	N/A
A7.3	64	0.506442	A8.5	76	0.78608	1	0.027489
A7.3	64	0.506442	A8.6	76	0.758591
A7.4	64	0.513077	A8.7	76	0.919102	2	0.075599	1
A7.4	64	0.513077	A8.8	76	0.843503
A7.5	64	0.863167	A7.5	76	1.9028	N/A
A7.6	64	0.647407	A7.6	76	1.4504	N/A
A7.7	64	0.65124	A8.13	76	0.75873	3	0.238392	1	1
A7.7	64	0.65124	A8.14	76	0.997122
A7.8	64	0.515469	A8.15	76	0.819344	4	0.084011	1
A7.8	64	0.515469	A8.16	76	0.903355
a7.9	64	0.117212	a7.9	76	1.04801	N/A
a7.10	64	0.460938	a7.10	76	0.898318	N/A
a7.11	64	2.6444	a7.11	76	1.3072	N/A
a7.12	64	3.00304	a7.12	76	1.77563	N/A
a7.13	64	1.97042	a7.13	76	0.826835	N/A
a7.14	64	2.29582	a7.14	76	1.36001	N/A
a7.15	64	3.03335	a7.15	76	1.28735	N/A
a7.16	64	2.73072	a7.16	76	1.43087	N/A
A7.1*	64	0.362387	A7.1*	76	1.64001	N/A
A7.2*	64	0.529088	A7.2*	76	1.94896	N/A
A7.3*	64	1.40319	A8.5*	76	0.901225	5	0.078257	1
A7.3*	64	1.40319	A8.6*	76	0.822968
A7.4*	64	1.23006	A8.7*	76	0.765823	6	0.043669	1
A7.4*	64	1.23006	A8.8*	76	0.809492
A7.5*	64	0.22493	A7.5*	76	1.93255	7	0.27544	1
A7.6*	64	0.722998	A7.6*	76	1.65711
A7.7*	64	0.331246	A8.13*	76	0.588853	8	0.348389	1	1
A7.7*	64	0.331246	A8.14*	76	0.937242
A7.8*	64	1.19927	A8.15*	76	0.805666	9	0.106959	1
A7.8*	64	1.19927	A8.16*	76	0.912625
a7.9*	64	0.462796	a7.9*	76	0.947936	N/A
a7.10*	64	0.770764	a7.10*	76	1.17621	N/A
a7.11*	64	2.46114	a7.11*	76	1.46139	N/A
a7.12*	64	2.52809	a7.12*	76	2.03995	N/A
a7.13*	64	2.18426	a7.13*	76	0.903879	N/A
a7.14*	64	2.4584	a7.14*	76	1.48494	N/A
a7.15*	64	2.75233	a7.15*	76	1.54564	N/A
a7.16*	64	2.57852	a7.16*	76	1.63468	N/A
B7.1	64	1.88798	B7.1	76	2.30667	N/A
B7.2	64	1.11126	B7.2	76	2.42851	N/A
B7.5	64	0.986276	B8.5	76	2.04309	10	1.71009	1	1	1
B7.6	64	0.0165793	B8.6	76	0.333001
B7.5	64	0.986276	B7.5	76	0.589435	N/A
B7.6	64	0.0165793	B7.6	76	0.553026	N/A
B7.4	64	2.38674	B8.7	76	1.49253	11	0.09291	1
B7.4	64	2.38674	B8.8	76	1.39962
B7.7	64	1.86257	B7.7	76	1.68758	N/A
B7.8	64	2.58537	B7.8	76	1.57438	N/A
b7.9	64	1.76719	b7.9	76	1.66926	N/A
b7.10	64	3.18117	b7.10	76	1.01108	N/A
b7.11	64	0.723405	b7.11	76	1.34407	N/A
b7.12	64	1.15429	b7.12	76	1.51003	N/A
b7.13	64	2.33272	b7.13	76	1.27296	N/A
b7.14	64	2.78251	b7.14	76	1.76189	N/A
b7.15	64	2.38965	b7.15	76	1.54038	N/A
b7.16	64	2.2091	b7.16	76	1.66879	N/A
B7.1*	64	1.67839	B7.1*	76	2.05699	N/A
B7.2*	64	1.84928	B7.2*	76	2.29811	N/A
B7.3*	64	0.100713	B8.5*	76	1.96356	12	1.7499	1	1	1
B7.3*	64	0.100713	B8.6*	76	0.21366
B7.5*	64	1.06284	B7.5*	76	0.629084	N/A
B7.6*	64	0.176309	B7.6*	76	0.522302	N/A
B7.4*	64	1.20376	B8.7*	76	1.46626	13	0.08145	1
B7.4*	64	1.20376	B8.8*	76	1.54771
B7.7*	64	1.785	B7.7*	76	1.70275	N/A
B7.8*	64	2.75642	B7.8*	76	1.68363	N/A
b7.9*	64	0.93105	b7.9*	76	1.53751	N/A
b7.10*	64	0.479793	b7.10*	76	0.850428	N/A
b7.11*	64	1.96341	b7.11*	76	1.1594	N/A
b7.12*	64	2.31476	b7.12*	76	1.62086	N/A
b7.13*	64	3.08875	b7.13*	76	1.19995	N/A
b7.14*	64	2.49774	b7.14*	76	1.7688	N/A
b7.15*	64	3.02394	b7.15*	76	1.43019	N/A
b7.16*	64	0.501815	b7.16*	76	1.47712	N/A
Cell ID	Cell Stage	Cell Volume: Embryo Volume	Cell ID	Cell Stage	Cell Volume: Embryo Volume	Daughter pair	Difference (vol) between daughters	Confidence Interval (0.05)	Confidence Interval (0.25)	Confidence Interval (0.50)
A7.1	76	1.59121	A7.1	112	1.77315	N/A
A7.2	76	2.10378	A7.2	112	2.22566	N/A
A8.5	76	0.78608	A8.5	112	0.871446	N/A
A8.6	76	0.758591	A8.6	112	0.74477	N/A
A8.7	76	0.919102	A8.7	112	0.801863	N/A
A8.8	76	0.843503	A8.8	112	0.655293	N/A
A7.5	76	1.9028	A7.5	112	1.84568	N/A
A7.6	76	1.4504	A8.11	112	0.787831	1	0.446067	1	1	1
A7.6	76	1.4504	A8.12	112	0.341764
A8.13	76	0.75873	A8.13	112	0.892063	2	0.106398	1
A8.14	76	0.997122	A8.14	112	0.785665
A8.15	76	0.819344	A8.15	112	0.712463	3	0.184551	1
A8.16	76	0.903355	A8.16	112	0.897014
a7.9	76	1.04801	a8.17	112	0.41126	4	0.099228	1
a7.9	76	1.04801	a8.18	112	0.510488
a7.10	76	0.898318	a8.19	112	0.414686	5	0.139127	1	1
a7.10	76	0.898318	a8.20	112	0.553813
a7.11	76	1.3072	a8.21	112	0.621848	6	0.033278	1
a7.11	76	1.3072	a8.22	112	0.58857
a7.12	76	1.77563	a8.23	112	0.81509	7	0.104594	1
a7.12	76	1.77563	a8.24	112	0.710496
a7.13	76	0.826835	a8.25	112	0.337836	8	0.105534	1	1
a7.13	76	0.826835	a8.26	112	0.44337
a7.14	76	1.36001	a8.27	112	0.654983	9	0.077447	1
a7.14	76	1.36001	a8.28	112	0.73243
a7.15	76	1.28735	a8.29	112	0.614208	10	0.012506
a7.15	76	1.28735	a8.30	112	0.626714
a7.16	76	1.43087	a8.31	112	0.555823	11	0.142538	1
a7.16	76	1.43087	a8.32	112	0.698361
A7.1*	76	1.64001	A7.1*	112	1.67584	N/A
A7.2*	76	1.94896	A7.2*	112	2.02699	N/A
A8.5*	76	0.901225	A8.5*	112	0.664413	N/A
A8.6*	76	0.822968	A8.6*	112	0.876731	N/A
A8.7*	76	0.765823	A8.7*	112	0.685218	N/A
A8.8*	76	0.809492	A8.8*	112	0.675584	N/A
A7.5*	76	1.93255	A7.5*	112	1.9494	N/A
A7.6*	76	1.65711	A8.11*	112	0.850226	12	0.520338	1	1	1
A7.6*	76	1.65711	A8.12*	112	0.329888
A8.13*	76	0.588853	A8.13*	112	0.878936	13	0.52047	1	1	1
A8.14*	76	0.937242	A8.14*	112	0.358466
A8.15*	76	0.805666	A8.15*	112	0.71884	14	0.30437	1	1
A8.16*	76	0.912625	A8.16*	112	1.02321
a7.9*	76	0.947936	a8.17*	112	0.323856	15	0.275365	1	1	1
a7.9*	76	0.947936	a8.18*	112	0.599221
a7.10*	76	1.17621	a8.19*	112	0.362388	16	0.175918	1	1
a7.10*	76	1.17621	a8.20*	112	0.538306
a7.11*	76	1.46139	a8.21*	112	0.582806	17	0.057493	1
a7.11*	76	1.46139	a8.22*	112	0.640299
a7.12*	76	2.03995	a8.23*	112	0.669724	18	0.292474	1	1
a7.12*	76	2.03995	a8.24*	112	0.962198
a7.13*	76	0.903879	a8.25*	112	0.374337	19	0.226848	1	1
a7.13*	76	0.903879	a8.26*	112	0.601185
a7.14*	76	1.48494	a8.27*	112	0.591738	20	0.09129	1
a7.14*	76	1.48494	a8.28*	112	0.683028
a7.15*	76	1.54564	a8.29*	112	0.715014	21	0.027092
a7.15*	76	1.54564	a8.30*	112	0.742106
a7.16*	76	1.63468	a8.31*	112	0.82617	22	0.071339	1
a7.16*	76	1.63468	a8.32*	112	0.897509
B7.1	76	2.30667	B7.1	112	1.87826	N/A
B7.2	76	2.42851	B7.2	112	2.48313	N/A
B8.5	76	2.04309	B8.5	112	1.34752	N/A
B8.6	76	0.333001	B8.6	112	0.3614	N/A
B7.5	76	0.589435	B7.5	112	1.04545	N/A
B7.6	76	0.553026	B7.6	112	0.103657	N/A
B8.7	76	1.49253	B8.7	112	1.69246	N/A
B8.8	76	1.39962	B8.8	112	2.11209	N/A
B7.7	76	1.68758	B7.7	112	2.0265	N/A
B7.8	76	1.57438	B8.15	112	0.662425	23	0.019315
B7.8	76	1.57438	B8.16	112	0.68174
b7.9	76	1.66926	b8.17	112	0.742083	24	0.022616
b7.9	76	1.66926	b8.18	112	0.764699
b7.10	76	1.01108	b8.19	112	0.404501	25	0.353417	1	1	1
b7.10	76	1.01108	b8.20	112	0.757918
b7.11	76	1.34407	b8.21	112	0.468278	26	0.390003	1	1	1
b7.11	76	1.34407	b8.22	112	0.858281
b7.12	76	1.51003	b8.23	112	0.865109	27	0.210015	1	1
b7.12	76	1.51003	b8.24	112	0.655094
b7.13	76	1.27296	b8.25	112	0.517294	28	0.293595	1	1
b7.13	76	1.27296	b8.26	112	0.810889
b7.14	76	1.76189	b8.27	112	0.787251	29	0.208726	1
b7.14	76	1.76189	b8.28	112	0.995977
b7.15	76	1.54038	b8.29	112	0.910981	30	0.11611	1
b7.15	76	1.54038	b8.30	112	0.794871
b7.16	76	1.66879	b8.31	112	0.886692	31	0.039419
b7.16	76	1.66879	b8.32	112	0.926111
B7.1*	76	2.05699	B7.1*	112	1.93178	N/A
B7.2*	76	2.29811	B7.2*	112	2.49203	N/A
B8.5*	76	1.96356	B8.5*	112	1.82727	N/A
B8.6*	76	0.21366	B8.6*	112	0.365126	N/A
B7.5*	76	0.629084	B7.5*	112	1.13682	N/A
B7.6*	76	0.522302	B7.6*	112	0.116692	N/A
B8.7*	76	1.46626	B8.7*	112	1.77652	N/A
B8.8*	76	1.54771	B8.8*	112	2.04579	N/A
B7.7*	76	1.70275	B7.7*	112	1.68706	N/A
B7.8*	76	1.68363	B8.15*	112	0.714208	32	0.114053	1
B7.8*	76	1.68363	B8.16*	112	0.600155
b7.9*	76	1.53751	b8.17*	112	0.729638	33	0.086227	1
b7.9*	76	1.53751	b8.18*	112	0.815865
b7.10*	76	0.850428	b8.19*	112	0.338504	34	0.430891	1	1	1
b7.10*	76	0.850428	b8.20*	112	0.769395
b7.11*	76	1.1594	b8.21*	112	0.473292	35	0.486024	1	1	1
b7.11*	76	1.1594	b8.22*	112	0.959316
b7.12*	76	1.62086	b8.23*	112	0.88341	36	0.010484
b7.12*	76	1.62086	b8.24*	112	0.872926
b7.13*	76	1.19995	b8.25*	112	0.489681	37	0.33371	1	1	1
b7.13*	76	1.19995	b8.26*	112	0.823391
b7.14*	76	1.7688	b8.27*	112	0.824586	38	0.046934	1
b7.14*	76	1.7688	b8.28*	112	0.87152
b7.15*	76	1.43019	b8.29*	112	0.873229	39	0.150361	1
b7.15*	76	1.43019	b8.30*	112	0.722868
b7.16*	76	1.47712	b8.31*	112	0.906304	40	0.068351	1
b7.16*	76	1.47712	b8.32*	112	0.837953
