# Supplementary material for: Quantifying Mosaic Development: Towards an Evo-Devo Postmodern Synthesis of the Evolution of Development via Differentiation Trees of Embryos
Source: Preprints.org preprint supplement (doi:10.20944/preprints201608.0108.v1), 2016-08-10
Supplement: Supplementary file 7 [file Supplemental-Table-S3.xlsx]

## Sheet: Sheet2
Paired Daughter Cells (A-B)								Confidence Intervals (exceeded = 1)
Parent Cell	size (sphere)	Daughter Cell A	size (sphere)	Daughter Cell B	size (sphere)	Larger Cell (A or B)	Size Differential	0.01	0.025	0.05
ABalaa	58.0592	ABalaap	52.1787	ABalaaa	52.1779	A	0.000807464	0	0	0
ABprpapp	45.4307	ABprpappp	38.3187	ABprpappa	38.3218	B	0.00310026	0	0	0
ABplaapa	46.0646	ABplaapap	38.9027	ABplaapaa	38.9115	B	0.00884779	0	0	0
ABpraapa	45.3725	ABpraapap	38.3677	ABpraapaa	38.3852	B	0.0175705	0	0	0
ABprpaa	52.1976	ABprpaap	45.0069	ABprpaaa	44.9873	A	0.0196258	0	0	0
Ear	49.6092	Earp	40.7246	Eara	40.703	A	0.0215576	0	0	0
ABalppapa	38.5408	ABalppapap	33.7642	ABalppapaa	33.7892	B	0.0250673	0	0	0
ABprpapap	37.9806	ABprpapapp	32.6869	ABprpapapa	32.7122	B	0.025345	0	0	0
ABarpapa	45.513	ABarpapap	37.94	ABarpapaa	37.9654	B	0.0253729	0	0	0
ABarpap	52.8527	ABarpapp	45.5413	ABarpapa	45.513	A	0.0282766	0	0	0
EMS	67.6081	MS	60.4891	E	60.5192	B	0.0300663	0	0	0
ABprpaaaa	38.6812	ABprpaaaap	33.7127	ABprpaaaaa	33.6804	A	0.0322279	0	0	0
ABprpappp	38.3187	ABprpapppp	33.0556	ABprpapppa	33.0885	B	0.0329447	0	0	0
ABplappp	44.909	ABplapppp	37.6226	ABplapppa	37.5813	A	0.0412993	0	0	0
ABalap	58.5475	ABalapp	52.5832	ABalapa	52.5416	A	0.0416009	0	0	0
MSappp	40.8087	MSapppp	35.6395	MSapppa	35.6952	B	0.0556858	0	0	0
ABplpaa	52.148	ABplpaap	45.1169	ABplpaaa	45.0586	A	0.0583564	0	0	0
Cppap	37.1188	Cppapp	33.5629	Cppapa	33.4986	A	0.0642908	0	0	0
MSpppp	41.7327	MSppppp	35.6552	MSppppa	35.7228	B	0.0675959	0	0	0
ABalpppap	39.1806	ABalpppapp	34.3663	ABalpppapa	34.2978	A	0.0684706	0	0	0
ABprppppp	38.2506	ABprpppppp	33.0581	ABprpppppa	33.1321	B	0.074037	0	0	0
ABplpaapa	38.4031	ABplpaapap	33.8923	ABplpaapaa	33.9674	B	0.075032	0	0	0
MSpp	55.7062	MSppp	49.4768	MSppa	49.552	B	0.0752115	0	0	0
ABarppp	52.5906	ABarpppp	45.0601	ABarpppa	44.9833	A	0.0768156	0	0	0
Ca	56.2949	Cap	53.6505	Caa	53.5676	A	0.0829063	0	0	0
ABplapap	45.6087	ABplapapp	39.0772	ABplapapa	39.1682	B	0.090937	0	0	0
ABprppapp	37.3985	ABprppappp	32.913	ABprppappa	33.0097	B	0.0966548	0	0	0
ABara	60.5623	ABarap	56.9817	ABaraa	57.079	B	0.0972911	0	0	0
ABplppppp	38.2578	ABplpppppp	33.0967	ABplpppppa	33.2005	B	0.103805	0	0	0
ABpraaaap	38.1375	ABpraaaapp	33.654	ABpraaaapa	33.7631	B	0.10905	0	0	0
ABarapppp	38.8103	ABarappppp	34.06	ABarappppa	33.9499	A	0.110101	0	0	0
ABprpaapa	38.0105	ABprpaapap	33.8098	ABprpaapaa	33.6969	A	0.112844	0	0	0
ABalapa	52.5416	ABalapap	45.141	ABalapaa	45.2657	B	0.124643	0	0	0
ABarpaaaa	37.6755	ABarpaaaap	33.0786	ABarpaaaaa	33.2035	B	0.124852	0	0	0
ABprpa	56.0742	ABprpap	52.3338	ABprpaa	52.1976	A	0.136141	0	0	0
ABplaaa	52.9848	ABplaaap	45.6914	ABplaaaa	45.8311	B	0.139723	0	0	0
ABprppapa	37.7507	ABprppapap	32.9383	ABprppapaa	32.7927	A	0.145633	0	0	0
ABarapppa	38.329	ABarapppap	33.3951	ABarapppaa	33.2476	A	0.147539	0	0	0
ABalppaa	44.3418	ABalppaap	37.1696	ABalppaaa	37.0207	A	0.148816	0	0	0
ABprpp	57.5063	ABprppp	52.4077	ABprppa	52.247	A	0.160688	0	0	0
Cppp	44.6308	Cpppp	37.2056	Cpppa	37.0444	A	0.161148	0	0	0
P2	72.6721	P3	62.7024	C	62.5364	A	0.165977	0	0	0
ABprpapaa	37.6332	ABprpapaap	33.2207	ABprpapaaa	33.3889	B	0.168275	0	0	0
MSaappp	36.9897	MSaapppp	33.1868	MSaapppa	33.3613	B	0.174467	0	0	0
Dpp	39.0352	Dppp	34.8213	Dppa	34.6419	A	0.179427	0	0	0
MSppap	42.1906	MSppapp	36.1955	MSppapa	36.3791	B	0.183658	0	0	0
ABarpa	58.3135	ABarpap	52.8527	ABarpaa	53.0433	B	0.190508	0	0	0
ABarapp	51.9127	ABarappp	45.0106	ABarappa	44.8193	A	0.191225	0	0	0
ABplaaaa	45.8311	ABplaaaap	38.4064	ABplaaaaa	38.2148	A	0.19168	0	0	0
MSpaaa	44.1353	MSpaaap	38.3725	MSpaaaa	38.5679	B	0.19541	0	0	0
Daa	40.6496	Daap	36.2374	Daaa	36.0417	A	0.195623	0	0	0
MSap	53.6136	MSapp	47.7751	MSapa	47.5778	A	0.19732	0	0	0
ABplpaaaa	38.9	ABplpaaaap	34.2544	ABplpaaaaa	34.0553	A	0.199097	0	0	0
ABplpapaa	37.6739	ABplpapaap	33.4546	ABplpapaaa	33.2463	A	0.208328	0	0	0
ABprppaap	36.8256	ABprppaapp	32.6904	ABprppaapa	32.4811	A	0.209378	0	0	0
Cappp	36.9113	Capppp	33.7276	Capppa	33.9414	B	0.213804	0	0	0
ABalaapa	44.533	ABalaapap	37.1564	ABalaapaa	37.3833	B	0.22683	0	0	0
Dap	39.0631	Dapp	35.0254	Dapa	34.7981	A	0.227292	0	0	0
ABal	69.4478	ABalp	63.6313	ABala	63.4034	A	0.227842	0	0	0
ABarpaap	46.7632	ABarpaapp	39.3335	ABarpaapa	39.0947	A	0.238826	0	0	0
ABprappa	46.3624	ABprappap	38.4587	ABprappaa	38.2115	A	0.247254	0	0	0
ABarpp	57.7941	ABarppp	52.5906	ABarppa	52.343	A	0.247591	0	0	0
MSpapaa	38.0953	MSpapaap	34.3556	MSpapaaa	34.1058	A	0.249815	0	0	0
ABarppa	52.343	ABarppap	44.6445	ABarppaa	44.9093	B	0.26481	0	0	0
ABplpaapp	38.7421	ABplpaappp	34.0351	ABplpaappa	34.3028	B	0.267683	0	0	0
ABplpa	57.3789	ABplpap	52.4157	ABplpaa	52.148	A	0.267698	0	0	0
ABaraap	52.4251	ABaraapp	45.5229	ABaraapa	45.7993	B	0.276412	0	0	0
ABalaap	52.1787	ABalaapp	44.8159	ABalaapa	44.533	A	0.28295	0	0	0
ABpra	62.0664	ABprap	57.6851	ABpraa	57.9696	B	0.28453	0	0	0
ABplap	55.8597	ABplapp	52.6661	ABplapa	52.3816	A	0.284596	0	0	0
ABalaapaa	37.3833	ABalaapaap	33.1437	ABalaapaaa	32.8566	A	0.287105	0	0	0
ABprpppp	45.5064	ABprppppp	38.2506	ABprppppa	38.5431	B	0.292509	0	0	0
MSapp	47.7751	MSappp	40.8087	MSappa	40.5104	A	0.298232	0	0	0
Dpa	36.9602	Dpap	36.0562	Dpaa	35.755	A	0.301208	0	0	0
MSaapaa	40.1478	MSaapaap	35.113	MSaapaaa	35.4169	B	0.303968	0	0	0
ABaraa	57.079	ABaraap	52.4251	ABaraaa	52.734	B	0.30886	0	0	0
MSpppa	41.3682	MSpppap	35.5969	MSpppaa	35.9083	B	0.311432	0	0	0
ABprpaapp	38.4076	ABprpaappp	33.7747	ABprpaappa	34.0906	B	0.315949	0	0	0
ABprppaa	44.0193	ABprppaap	36.8256	ABprppaaa	36.5084	A	0.317248	0	0	0
ABpraaapa	37.8383	ABpraaapap	33.9685	ABpraaapaa	33.6421	A	0.326332	0	0	0
Cpap	46.3009	Cpapp	39.8297	Cpapa	39.502	A	0.327701	0	0	0
ABplpaap	45.1169	ABplpaapp	38.7421	ABplpaapa	38.4031	A	0.339092	0	0	0
ABprapa	52.5763	ABprapap	45.5742	ABprapaa	45.2223	A	0.351861	0	0	0
ABprppap	44.6038	ABprppapp	37.3985	ABprppapa	37.7507	B	0.352259	0	0	0
ABplapaaa	38.2434	ABplapaaap	33.433	ABplapaaaa	33.0791	A	0.35392	1	0	0
MSppp	49.4768	MSpppp	41.7327	MSpppa	41.3682	A	0.364503	0	0	0
ABpraa	57.9696	ABpraap	52.9366	ABpraaa	52.5627	A	0.373824	0	0	0
ABa	73.8474	ABar	69.0571	ABal	69.4478	B	0.390744	0	0	0
ABprpaap	45.0069	ABprpaapp	38.4076	ABprpaapa	38.0105	A	0.397141	1	0	0
ABalpaaaaa	33.4157	ABalpaaaap	33.0176	ABalpaaaaa	33.4157	B	0.398127	1	0	0
ABplaapaa	38.9115	ABplaapaap	34.2296	ABplaapaaa	33.8196	A	0.41001	1	0	0
ABplppp	52.0265	ABplpppp	45.0459	ABplpppa	44.6345	A	0.411346	0	0	0
Capap	36.26	Capapp	33.5591	Capapa	33.9714	B	0.412273	1	0	0
ABprpappa	38.3218	ABprpappap	33.1798	ABprpappaa	33.6068	B	0.427	1	0	0
ABprapap	45.5742	ABprapapp	38.4824	ABprapapa	38.922	B	0.439645	1	0	0
Cpaa	48.9152	Cpaap	41.137	Cpaaa	41.5879	B	0.45093	1	0	0
ABplpp	56.912	ABplppp	52.0265	ABplppa	51.571	A	0.455457	0	0	0
Cpp	52.9687	Cppp	44.6308	Cppa	44.1677	A	0.463081	1	0	0
ABalp	63.6313	ABalpp	58.0654	ABalpa	58.5309	B	0.465551	0	0	0
ABplp	60.9514	ABplpp	56.912	ABplpa	57.3789	B	0.466811	0	0	0
Caaa	47.0965	Caaap	39.8816	Caaaa	39.403	A	0.478524	1	0	0
ABarappp	45.0106	ABarapppp	38.8103	ABarapppa	38.329	A	0.481288	1	0	0
ABala	63.4034	ABalap	58.5475	ABalaa	58.0592	A	0.488313	0	0	0
ABprppp	52.4077	ABprpppp	45.5064	ABprpppa	45.012	A	0.494367	1	0	0
MSpappp	36.0924	MSpapppp	32.8484	MSpapppa	33.3429	B	0.49449	1	0	0
MSppa	49.552	MSppap	42.1906	MSppaa	41.6863	A	0.504293	1	0	0
ABpraapaa	38.3852	ABpraapaap	34.0549	ABpraapaaa	33.5502	A	0.504676	1	0	0
ABprpap	52.3338	ABprpapp	45.4307	ABprpapa	44.9214	A	0.509236	1	0	0
ABalpappa	38.9347	ABalpappap	34.0603	ABalpappaa	33.5488	A	0.511492	1	0	0
Cappa	38.539	Cappap	33.6529	Cappaa	34.1718	B	0.518898	1	0	0
ABarp	62.2193	ABarpp	57.7941	ABarpa	58.3135	B	0.519369	0	0	0
ABarap	56.9817	ABarapp	51.9127	ABarapa	52.4452	B	0.53255	1	0	0
D	53.517	Dp	45.2029	Da	45.7464	B	0.543442	1	0	0
Dppp	34.8213	Dpppp	32.6523	Dpppa	33.2021	B	0.549803	1	0	0
ABplapa	52.3816	ABplapap	45.6087	ABplapaa	45.0586	A	0.550162	1	0	0
ABalapaa	45.2657	ABalapaap	38.4258	ABalapaaa	37.8734	A	0.552415	1	0	0
ABpraaaaa	36.7932	ABpraaaaap	32.5114	ABpraaaaaa	33.066	B	0.554568	1	0	0
ABalapp	52.5832	ABalappp	45.2689	ABalappa	44.7132	A	0.555735	1	0	0
ABalapppa	38.5981	ABalapppap	34.3633	ABalapppaa	33.7931	A	0.570281	1	0	0
MSapap	40.88	MSapapp	37.0046	MSapapa	36.422	A	0.582565	1	0	0
ABprppa	52.247	ABprppap	44.6038	ABprppaa	44.0193	A	0.584486	1	0	0
ABalpa	58.5309	ABalpap	53.2091	ABalpaa	52.6212	A	0.587865	1	0	0
ABplapppa	37.5813	ABplapppap	33.3626	ABplapppaa	32.7701	A	0.592537	1	0	0
ABarapapp	39.2924	ABarappapp	33.1533	ABarapappa	33.7483	B	0.595001	1	0	0
ABplapaa	45.0586	ABplapaap	37.6174	ABplapaaa	38.2434	B	0.626051	1	0	0
ABprapppa	37.0819	ABprapppap	33.0584	ABprapppaa	32.4279	A	0.630517	1	0	0
ABplaa	57.6632	ABplaap	53.631	ABplaaa	52.9848	A	0.646206	1	0	0
ABplppa	51.571	ABplppap	44.4648	ABplppaa	43.8167	A	0.648028	1	0	0
ABalpp	58.0654	ABalppp	52.8843	ABalppa	52.2334	A	0.650819	1	0	0
ABarapa	52.4452	ABarapap	45.6465	ABarapaa	44.9841	A	0.662384	1	0	0
ABalppp	52.8843	ABalpppp	46.0552	ABalpppa	45.3843	A	0.67087	1	0	0
ABplaap	53.631	ABplaapp	46.7355	ABplaapa	46.0646	A	0.670921	1	0	0
ABprpaaap	37.7063	ABprpaaapp	33.7625	ABprpaaapa	33.0565	A	0.705942	1	0	0
MSp	57.9384	MSpp	55.7062	MSpa	56.4503	B	0.744179	1	0	0
ABprapaa	45.2223	ABprapaap	38.568	ABprapaaa	37.8196	A	0.748386	1	0	0
ABplpaaap	38.0551	ABplpaaapp	34.0683	ABplpaaapa	33.3087	A	0.759578	1	0	0
Cpppa	37.0444	Cpppap	34.4542	Cpppaa	35.2356	B	0.781392	1	0	0
ABarpapaa	37.9654	ABarpapaap	33.8966	ABarpapaaa	33.1093	A	0.787299	1	0	0
ABplaapap	38.9027	ABplaapapp	34.363	ABplaapapa	33.5724	A	0.790546	1	0	0
ABalpapp	46.5758	ABalpappp	39.7296	ABalpappa	38.9347	A	0.794931	1	0	0
ABarppaa	44.9093	ABarppaap	37.5868	ABarppaaa	36.7825	A	0.804292	1	0	0
AB	77.2563	ABp	73.0237	ABa	73.8474	B	0.823745	1	0	0
ABalpappp	39.7296	ABalpapppp	35.1167	ABalpapppa	34.2905	A	0.826181	1	0	0
ABplpaaa	45.0586	ABplpaaap	38.0551	ABplpaaaa	38.9	B	0.844931	1	0	0
Cpppp	37.2056	Cppppp	34.4806	Cppppa	33.6224	A	0.858183	1	1	0
ABalpap	53.2091	ABalpapp	46.5758	ABalpapa	45.7169	A	0.858844	1	0	0
ABpraaa	52.5627	ABpraaap	45.6389	ABpraaaa	44.7649	A	0.873991	1	0	0
ABalaapp	44.8159	ABalaappp	38.4962	ABalaappa	37.6161	A	0.880132	1	0	0
MSaaaap	37.1694	MSaaaapp	33.8248	MSaaaapa	34.713	B	0.888203	1	1	0
ABarapap	45.6465	ABarapapp	39.2924	ABarapapa	38.3914	A	0.900909	1	0	0
ABpraapap	38.3677	ABpraapapp	34.1008	ABpraapapa	33.1901	A	0.910766	1	1	0
ABplpap	52.4157	ABplpapp	45.9747	ABplpapa	45.0609	A	0.913826	1	0	0
MSppaa	41.6863	MSppaap	35.6135	MSppaaa	36.5323	B	0.918768	1	1	0
ABalappap	38.0681	ABalappapp	33.9799	ABalappapa	33.0588	A	0.921133	1	1	0
MSpap	50.2438	MSpapp	42.4494	MSpapa	43.3768	B	0.927447	1	0	0
ABalapap	45.141	ABalapapp	38.8197	ABalapapa	37.8763	A	0.943396	1	0	0
ABplaaaaa	38.2148	ABplaaaaap	34.0748	ABplaaaaaa	33.1153	A	0.959433	1	1	0
Capaa	37.7704	Capaap	33.2773	Capaaa	34.2487	B	0.971341	1	1	0
E	60.5192	Ep	58.5416	Ea	57.5489	A	0.992729	1	0	0
ABpraaapp	39.4134	ABpraaappp	35.0081	ABpraaappa	34.0092	A	0.998921	1	1	0
MSpapap	36.7125	MSpapapp	33.3242	MSpapapa	32.2729	A	1.05126	1	1	0
ABp	73.0237	ABpr	68.0123	ABpl	66.9559	A	1.0564	1	0	0
ABplapp	52.6661	ABplappp	44.909	ABplappa	46.0262	B	1.11727	1	0	0
MSpaapa	37.801	MSpaapap	34.1114	MSpaapaa	32.9822	A	1.12919	1	1	0
MSpaaap	38.3725	MSpaaapp	34.511	MSpaaapa	33.3742	A	1.1368	1	1	0
MSaaapa	37.9819	MSaaapap	34.6881	MSaaapaa	35.8253	B	1.13719	1	1	0
ABalpppppp	35.3078	ABalppppppp	32.5921	ABalppppppa	31.437	A	1.15509	1	1	0
ABalappa	44.7132	ABalappap	38.0681	ABalappaa	36.896	A	1.17212	1	1	0
C	62.5364	Cp	55.0393	Ca	56.2949	B	1.25562	1	0	0
MSappa	40.5104	MSappap	35.3963	MSappaa	36.6522	B	1.25584	1	1	0
ABprapp	52.757	ABprappp	45.0823	ABprappa	46.3624	B	1.28003	1	1	0
ABarappa	44.8193	ABarappap	38.3302	ABarappaa	37.04	A	1.29025	1	1	0
MSpapp	42.4494	MSpappp	36.0924	MSpappa	34.7896	A	1.30284	1	1	0
ABpraaaa	44.7649	ABpraaaap	38.1375	ABpraaaaa	36.7932	A	1.34427	1	1	0
ABarapaapa	33.2175	ABarapaapp	34.5736	ABarapaapa	33.2175	A	1.35607	1	1	0
ABpraaappp	35.0081	ABpraaapppp	32.7338	ABpraaapppa	31.352	A	1.38187	1	1	0
MSpapa	43.3768	MSpapap	36.7125	MSpapaa	38.0953	B	1.38273	1	1	0
ABalppa	52.2334	ABalppap	45.7647	ABalppaa	44.3418	A	1.42295	1	1	0
ABpraap	52.9366	ABpraapp	46.8037	ABpraapa	45.3725	A	1.43121	1	1	0
ABprp	59.9801	ABprpp	57.5063	ABprpa	56.0742	A	1.43201	1	1	0
ABaraapppp	33.3544	ABaraapppp	33.3544	ABaraapppa	34.808	B	1.45364	1	1	0
MSaaaaa	38.692	MSaaaaap	34.632	MSaaaaaa	33.1719	A	1.46012	1	1	0
Capa	45.6247	Capap	36.26	Capaa	37.7704	B	1.51039	1	1	0
MSaaaa	44.8717	MSaaaap	37.1694	MSaaaaa	38.692	B	1.52254	1	1	0
ABpraappa	38.2606	ABpraappp	39.8042	ABpraappa	38.2606	A	1.54353	1	1	0
ABarpapp	45.5413	ABarpappp	38.722	ABarpappa	37.17	A	1.55194	1	1	0
Da	45.7464	Dap	39.0631	Daa	40.6496	B	1.58657	1	1	0
Cppaa	39.4718	Cppaap	35.1091	Cppaaa	36.7077	B	1.59864	1	1	0
ABaraaa	52.734	ABaraaap	46.3816	ABaraaaa	44.7728	A	1.6088	1	1	0
Dapp	35.0254	Dappp	32.2524	Dappa	33.8778	B	1.62539	1	1	0
Capp	43.45	Cappp	36.9113	Cappa	38.539	B	1.6277	1	1	0
ABplaaap	45.6914	ABplaaapp	38.8867	ABplaaapa	37.2447	A	1.64203	1	1	0
ABar	69.0571	ABarp	62.2193	ABara	60.5623	A	1.65694	1	1	0
ABpl	66.9559	ABplp	60.9514	ABpla	59.2883	A	1.6631	1	1	0
P0	71.8806	P1	78.9232	AB	77.2563	A	1.6669	1	0	0
MSaap	47.8374	MSaapp	40.9931	MSaapa	42.6806	B	1.6875	1	1	0
MSpaa	50.1628	MSpaap	42.3774	MSpaaa	44.1353	B	1.75792	1	1	0
MSaaa	51.5081	MSaaap	43.1105	MSaaaa	44.8717	B	1.7612	1	1	0
MSaapap	36.3159	MSaapapp	33.9445	MSaapapa	32.1538	A	1.79068	1	1	1
Epr	49.1907	Eprp	39.8901	Epra	41.6812	B	1.79103	1	1	0
ABpla	59.2883	ABplap	55.8597	ABplaa	57.6632	B	1.80344	1	1	0
ABprppppa	38.5431	ABprppppap	34.8944	ABprppppaa	32.952	A	1.94239	1	1	1
ABarpaa	53.0433	ABarpaap	46.7632	ABarpaaa	44.7449	A	2.01822	1	1	0
Dp	45.2029	Dpp	39.0352	Dpa	36.9602	A	2.075	1	1	1
ABpr	68.0123	ABprp	59.9801	ABpra	62.0664	B	2.08624	1	1	0
P3	62.7024	P4	51.4183	D	53.517	B	2.09873	1	1	0
Caa	53.5676	Caap	44.9833	Caaa	47.0965	B	2.1132	1	1	0
Cap	53.6505	Capp	43.45	Capa	45.6247	B	2.17472	1	1	0
MS	60.4891	MSp	57.9384	MSa	60.1669	B	2.22847	1	1	0
Caap	44.9833	Caapp	38.0481	Caapa	35.8097	A	2.23833	1	1	1
ABalpaa	52.6212	ABalpaap	47.1291	ABalpaaa	44.872	A	2.25708	1	1	0
MSapaa	44.2032	MSapaap	35.9784	MSapaaa	38.2903	B	2.31188	1	1	1
Cppa	44.1677	Cppap	37.1188	Cppaa	39.4718	B	2.35303	1	1	1
Cpa	55.9356	Cpap	46.3009	Cpaa	48.9152	B	2.6143	1	1	1
MSaaap	43.1105	MSaaapp	35.2238	MSaaapa	37.9819	B	2.75809	1	1	1
MSaapp	40.9931	MSaappp	36.9897	MSaappa	34.2302	A	2.75948	1	1	1
Eal	54.1533	Ealp	40.9675	Eala	43.9313	B	2.96378	1	1	1
Cp	55.0393	Cpp	52.9687	Cpa	55.9356	B	2.96691	1	1	1
Epl	54.0625	Eplp	39.8948	Epla	43.1562	B	3.26139	1	1	1
MSapa	47.5778	MSapap	40.88	MSapaa	44.2032	B	3.32316	1	1	1
MSaa	57.9162	MSaap	47.8374	MSaaa	51.5081	B	3.67077	1	1	1
MSaapa	42.6806	MSaapap	36.3159	MSaapaa	40.1478	B	3.83199	1	1	1
MSa	60.1669	MSap	53.6136	MSaa	57.9162	B	4.30262	1	1	1
Ea	57.5489	Ear	49.6092	Eal	54.1533	B	4.54417	1	1	1
ABprpaaa	44.9873	ABprpaaap	37.7063	ABprapaaaa	32.9405	A	4.76576	1	1	1
Ep	58.5416	Epr	49.1907	Epl	54.0625	B	4.87184	1	1	1
P1	78.9232	EMS	67.6081	P2	72.6721	B	5.06403	1	1	1
