# Supplementary material for: Quantifying Mosaic Development: Towards an Evo-Devo Postmodern Synthesis of the Evolution of Development via Differentiation Trees of Embryos
Source: Preprints.org preprint supplement (doi:10.20944/preprints201608.0108.v1), 2016-08-10
Supplement: Supplementary file 10 [file Supplemental-Table-S4.xlsx]

## Sheet: C-Intestinalis-diff-code
Nomenclature	Hamming Distance	Lineage Depth	Differentiation Code	Lineage Code
A3	1	2	[01]	[11]
A3*	0	2	[00]	[00]
A4.1	1	3	[101]	[111]
A4.1*	1	3	[100]	[000]
a4.2	3	3	[001]	[110]
a4.2*	1	3	[000]	[001]
A5.1	1	4	[1101]	[1111]
A5.1*	1	4	[0100]	[0000]
A5.2	3	4	[0101]	[1110]
A5.2*	3	4	[1100]	[0001]
a5.3	2	4	[0000]	[1001]
a5.3*	0	4	[0010]	[0010]
a5.4	1	4	[1001]	[1000]
a5.4*	3	4	[1000]	[0011]
A6.1	2	5	[01101]	[11111]
A6.1*	1	5	[00100]	[00000]
A6.2	2	5	[11101]	[11110]
A6.2*	3	5	[10100]	[00001]
A6.3	2	5	[00101]	[11101]
A6.3*	3	5	[01100]	[00010]
A6.4	2	5	[10101]	[11100]
A6.4*	5	5	[11100]	[00011]
a6.5	3	5	[00001]	[11011]
a6.5*	1	5	[00000]	[00100]
a6.6	3	5	[10001]	[11010]
a6.6*	3	5	[10000]	[00101]
a6.7	1	5	[01001]	[11001]
a6.7*	3	5	[01000]	[00110]
a6.8	1	5	[11001]	[11000]
a6.8*	5	5	[11000]	[00111]
A7.1	3	6	[001101]	[111111]
A7.1*	1	6	[000100]	[000000]
a7.10	4	6	[100001]	[011011]
a7.10*	1	6	[100000]	[100100]
a7.11	3	6	[010001]	[111010]
a7.11*	2	6	[010000]	[000101]
a7.12	3	6	[110001]	[011010]
a7.12*	2	6	[110000]	[100101]
a7.13	2	6	[001001]	[111001]
a7.13*	2	3	[001000]	[000110]
a7.14	2	6	[101001]	[011001]
a7.14*	3	6	[101000]	[100110]
a7.15	0	6	[111001]	[111000]
a7.15*	5	6	[011000]	[000111]
a7.16	1	6	[011001]	[011000]
a7.16*	5	6	[111000]	[100111]
A7.2	3	6	[101101]	[011111]
A7.2*	1	6	[100100]	[100000]
A7.3	0	6	[111101]	[111101]
A7.3*	3	6	[010100]	[000001]
A7.4	2	6	[011101]	[011110]
A7.4*	3	6	[110100]	[100001]
A7.5	2	6	[100101]	[111101]
A7.5*	3	6	[001100]	[000010]
A7.6	2	6	[000101]	[011101]
A7.6*	3	6	[101100]	[100010]
A7.7	2	6	[010101]	[111100]
A7.7*	4	6	[011100]	[000011]
A7.8	2	6	[110101]	[011100]
A7.8*	4	6	[111100]	[100011]
a7.9	4	6	[000001]	[111011]
a7.9*	1	6	[000000]	[000100]
A8.11	3	7	[1100101]	[1011101]
A8.11*	3	7	[1101100]	[0100010]
A8.12	3	7	[0100101]	[0011101]
A8.12*	3	7	[0101100]	[1100010]
A8.13	3	7	[0010101]	[1111100]
A8.13*	3	7	[0011100]	[0000011]
A8.14	3	7	[1010101]	[0111100]
A8.14*	3	7	[1011100]	[1000011]
A8.15	3	7	[0110101]	[1011100]
A8.15*	3	7	[0111100]	[0100011]
A8.16	3	7	[1110101]	[0011100]
A8.16*	3	7	[1111100]	[1100011]
a8.17	4	7	[0000001]	[1111011]
a8.17*	1	7	[0000000]	[0000100]
a8.18	4	7	[1000001]	[0111011]
a8.18*	1	7	[1000000]	[1000100]
a8.19	4	7	[0100001]	[1011011]
a8.19*	1	7	[0100000]	[0100100]
a8.20	4	7	[1100001]	[0011011]
a8.20*	1	7	[1100000]	[1100100]
a8.21	2	7	[1010001]	[1111010]
a8.21*	2	7	[0010000]	[0000101]
a8.22	2	7	[0010001]	[0111010]
a8.22*	2	7	[1010000]	[1000101]
a8.23	2	7	[1110001]	[1011010]
a8.23*	2	7	[0110000]	[0100101]
a8.24	2	7	[0110001]	[0011010]
a8.24*	2	7	[1110000]	[1100101]
a8.25	3	7	[0001001]	[1111001]
a8.25*	3	7	[0001000]	[0000110]
a8.26	3	7	[1001001]	[0111001]
a8.26*	4	7	[1001000]	[0100110]
a8.27	3	7	[0101001]	[1011001]
a8.27*	3	7	[0101000]	[0100110]
a8.28	3	7	[1101001]	[0011001]
a8.28*	3	7	[1101000]	[1100110]
a8.29	1	7	[0111001]	[1111000]
a8.29*	5	7	[0011000]	[0000111]
a8.30	2	7	[1111001]	[0111000]
a8.30*	5	7	[1011000]	[1000111]
a8.31	2	7	[0011001]	[1011000]
a8.31*	5	7	[0111000]	[0100111]
a8.32	2	7	[1011001]	[0011000]
a8.32*	5	7	[1111000]	[1100111]
A8.5	0	7	[1111101]	[1111110]
A8.6	0	7	[0111101]	[0111110]
A8.7	3	7	[0011101]	[1011110]
A8.7*	3	7	[0010100]	[0100000]
A8.8	3	7	[1011101]	[0011110]
A8.8*	3	7	[1010100]	[1100001]
AB2	0	1	[1]	[1]
AB2*	0	1	[0]	[0]
B3	1	2	[11]	[10]
B3*	2	2	[10]	[01]
B4.1	1	3	[111]	[101]
B4.1*	1	3	[110]	[010]
b4.2	3	3	[011]	[100]
b4.2*	1	3	[010]	[011]
B5.1	2	4	[0111]	[1011]
B5.1*	2	4	[1110]	[0100]
B5.2	2	4	[1111]	[1010]
B5.2*	2	4	[0110]	[0101]
b5.3	3	4	[0011]	[1101]
b5.3*	1	4	[0010]	[0110]
b5.4	3	4	[1011]	[1100]
b5.4*	3	4	[1010]	[0111]
B6.1	1	5	[00111]	[10111]
B6.1*	2	5	[01110]	[01000]
B6.2	1	5	[10111]	[10110]
B6.2*	4	5	[11110]	[01001]
B6.3	3	5	[01111]	[10101]
B6.3*	2	5	[00110]	[01010]
B6.4	3	5	[11111]	[10100]
B6.4*	4	5	[10110]	[01011]
b6.5	0	5	[10011]	[10011]
b6.5*	4	5	[10010]	[01100]
b6.6	2	5	[00011]	[10010]
b6.6*	4	5	[00010]	[01101]
b6.7	3	5	[01011]	[10001]
b6.7*	1	5	[01010]	[01110]
b6.8	3	5	[11011]	[10000]
b6.8*	3	5	[11010]	[01111]
B7.1	2	6	[000111]	[110111]
B7.1*	2	6	[001110]	[001000]
b7.10	1	6	[110011]	[010011]
b7.10*	3	6	[100010]	[101100]
b7.11	2	6	[000011]	[110010]
b7.11*	4	6	[010010]	[001101]
b7.12	2	6	[100011]	[010010]
b7.12*	4	6	[110010]	[101101]
b7.13	4	6	[001011]	[110001]
b7.13*	1	6	[001010]	[001110]
b7.14	4	6	[101011]	[010001]
b7.14*	1	6	[101010]	[101110]
b7.15	2	6	[111011]	[110000]
b7.15*	2	6	[011010]	[001111]
b7.16	3	6	[011011]	[010000]
b7.16*	3	6	[111010]	[101111]
B7.2	2	6	[100111]	[010111]
B7.2*	2	6	[101110]	[101000]
B7.3	1	6	[010111]	[110110]
B7.3*	3	6	[011110]	[001001]
B7.4	1	6	[110111]	[010110]
B7.4*	3	6	[111110]	[101001]
B7.5	4	6	[1010111]	[110101]
B7.5*	2	6	[1011110]	[001010]
B7.6	4	6	[0010111]	[010101]
B7.6*	2	6	[0011110]	[101010]
B7.7	4	6	[0110111]	[110100]
B7.7*	2	6	[0111110]	[001011]
B7.8	4	6	[1110111]	[010100]
B7.8*	4	6	[1111110]	[101011]
b7.9	1	6	[010011]	[110011]
b7.9*	3	6	[000010]	[001100]
b8.17	1	7	[0010011]	[1010011]
b8.17*	2	7	[0000010]	[0001100]
b8.18	1	7	[1010011]	[0010011]
b8.18*	2	7	[1000010]	[1001100]
b8.19	2	7	[0110011]	[1010011]
b8.19*	2	7	[0100010]	[0101100]
b8.20	2	7	[1110011]	[0010011]
b8.20*	2	7	[1100010]	[1101100]
b8.21	3	7	[0000011]	[1110010]
b8.21*	3	7	[0010010]	[0001101]
b8.22	3	7	[1000011]	[0110010]
b8.22*	3	7	[1010010]	[1001101]
b8.23	3	7	[0100011]	[1010010]
b8.23*	3	7	[0110010]	[0101101]
b8.24	3	7	[1100011]	[0010010]
b8.24*	3	7	[1110010]	[1101101]
b8.25	4	7	[0001011]	[1110001]
b8.25*	1	7	[0001010]	[0001110]
b8.26	4	7	[1001011]	[0110001]
b8.26*	1	7	[1001010]	[1001110]
b8.27	5	7	[0101011]	[1010001]
b8.27*	1	7	[0101010]	[0101110]
b8.28	5	7	[1101011]	[0010001]
b8.28*	1	7	[1101010]	[1101110]
b8.29	2	7	[0111011]	[1110000]
b8.29*	3	7	[0011010]	[0001111]
b8.30	2	7	[1111011]	[0110000]
b8.30*	3	7	[1011010]	[1001111]
b8.31	2	7	[0011011]	[1010000]
b8.31*	2	7	[0111010]	[0101111]
b8.32	4	7	[1011011]	[0010000]
b8.32*	2	7	[1111001]	[1101111]
B8.5*	2	7	[100110]	[0001001]
B8.6*	2	7	[000110]	[1001001]

## Sheet: C-intestinalis CAST code
Nomenclature	Lineage Depth	Differentiation Code	Lineage Code	CAST Code -- Differentiation Code	CAST Code -- Lineage Code
A3	B	CE	EE	B.CE	B.EE
A3*	B	CC	CC	B.CC	B.CC
A4.1	C	ECE	EEE	C.ECE	C.EEE
A4.1*	C	ECC	CCC	C.ECC	C.CCC
a4.2	C	CCE	EEC	C.CCE	C.EEC
a4.2*	C	CCC	CCE	C.CCC	C.CCE
A5.1	D	EECE	EEEE	D.EECE	D.EEEE
A5.1*	D	CECC	CCCC	D.CECC	D.CCCC
A5.2	D	CECE	EEEC	D.CECE	D.EEEC
A5.2*	D	EECC	CCCE	D.EECC	D.CCCE
a5.3	D	CCCC	ECCE	D.CCCC	D.ECCE
a5.3*	D	CCEC	CCEC	D.CCEC	D.CCEC
a5.4	D	ECCE	ECCC	D.ECCE	D.ECCC
a5.4*	D	ECCC	CCEE	D.ECCC	D.CCEE
A6.1	E	CEECE	EEEEE	E.CEECE	E.EEEEE
A6.1*	E	CCECC	CCCCC	E.CCECC	E.CCCCC
A6.2	E	EEECE	EEEEC	E.EEECE	E.EEEEC
A6.2*	E	ECECC	CCCCE	E.ECECC	E.CCCCE
A6.3	E	CCECE	EEECE	E.CCECE	E.EEECE
A6.3*	E	CEECC	CCCEC	E.CEECC	E.CCCEC
A6.4	E	ECECE	EEECC	E.ECECE	E.EEECC
A6.4*	E	EEECC	CCCEE	E.EEECC	E.CCCEE
a6.5	E	CCCCE	EECEE	E.CCCCE	E.EECEE
a6.5*	E	CCCCC	CCECC	E.CCCCC	E.CCECC
a6.6	E	ECCCE	EECEC	E.ECCCE	E.EECEC
a6.6*	E	ECCCC	CCECE	E.ECCCC	E.CCECE
a6.7	E	CECCE	EECCE	E.CECCE	E.EECCE
a6.7*	E	CECCC	CCEEC	E.CECCC	E.CCEEC
a6.8	E	EECCE	EECCC	E.EECCE	E.EECCC
a6.8*	E	EECCC	CCEEE	E.EECCC	E.CCEEE
A7.1	F	CCEECE	EEEEEE	F.CCEECE	F.EEEEEE
A7.1*	F	CCCECC	CCCCCC	F.CCCECC	F.CCCCCC
a7.10	F	ECCCCE	CEECEE	F.ECCCCE	F.CEECEE
a7.10*	F	ECCCCC	ECCECC	F.ECCCCC	F.ECCECC
a7.11	F	CECCCE	EEECEC	F.CECCCE	F.EEECEC
a7.11*	F	CECCCC	CCCECE	F.CECCCC	F.CCCECE
a7.12	F	EECCCE	CEECEC	F.EECCCE	F.CEECEC
a7.12*	F	EECCCC	ECCECE	F.EECCCC	F.ECCECE
a7.13	F	CCECCE	EEECCE	F.CCECCE	F.EEECCE
a7.13*	F	CCECCC	CCCEEC	F.CCECCC	F.CCCEEC
a7.14	F	ECECCE	CEECCE	F.ECECCE	F.CEECCE
a7.14*	F	ECECCC	ECCEEC	F.ECECCC	F.ECCEEC
a7.15	F	EEECCE	EEECCC	F.EEECCE	F.EEECCC
a7.15*	F	CEECCC	CCCEEE	F.CEECCC	F.CCCEEE
a7.16	F	EEECCC	CEECCC	F.EEECCC	F.CEECCC
a7.16*	F	EEECCC	ECCEEE	F.EEECCC	F.ECCEEE
A7.2	F	ECEECE	CEEEEE	F.ECEECE	F.CEEEEE
A7.2*	F	ECCECC	ECCCCC	F.ECCECC	F.ECCCCC
A7.3	F	EEEECE	EEEECE	F.EEEECE	F.EEEECE
A7.3*	F	CECECC	CCCCCE	F.CECECC	F.CCCCCE
A7.4	F	CEEECE	CEEEEC	F.CEEECE	F.CEEEEC
A7.4*	F	EECECC	ECCCCE	F.EECECC	F.ECCCCE
A7.5	F	ECCECE	EEEECE	F.ECCECE	F.EEEECE
A7.5*	F	CCEECC	CCCCEC	F.CCEECC	F.CCCCEC
A7.6	F	CCCECE	CEEECE	F.CCCECE	F.CEEECE
A7.6*	F	ECEECC	ECCCEC	F.ECEECC	F.ECCCEC
A7.7	F	CECECE	EEEECC	F.CECECE	F.EEEECC
A7.7*	F	CEEECC	CCCCEE	F.CEEECC	F.CCCCEE
A7.8	F	EECECE	CEEECC	F.EECECE	F.CEEECC
A7.8*	F	EEEECC	ECCCEE	F.EEEECC	F.ECCCEE
a7.9	F	CCCCCE	EEECEE	F.CCCCCE	F.EEECEE
a7.9*	F	CCCCCC	CCCECC	F.CCCCCC	F.CCCECC
A8.11	G	EECCECE	ECEEECE	G.EECCECE	G.ECEEECE
A8.11*	G	EECEECC	CECCCEC	G.EECEECC	G.CECCCEC
A8.12	G	CECCECE	CCEEECE	G.CECCECE	G.CCEEECE
A8.12*	G	CECEECC	EECCCEC	G.CECEECC	G.EECCCEC
A8.13	G	CCECECE	EEEEECC	G.CCECECE	G.EEEEECC
A8.13*	G	CCEEECC	CCCCCEE	G.CCEEECC	G.CCCCCEE
A8.14	G	ECECECE	CEEEECC	G.ECECECE	G.CEEEECC
A8.14*	G	ECEEECC	ECCCCEE	G.ECEEECC	G.ECCCCEE
A8.15	G	CEECECE	ECEEECC	G.CEECECE	G.ECEEECC
A8.15*	G	CEEEECC	CECCCEE	G.CEEEECC	G.CECCCEE
A8.16	G	EEECECE	CCEEECC	G.EEECECE	G.CCEEECC
A8.16*	G	EEEEECC	EECCCEE	G.EEEEECC	G.EECCCEE
a8.17	G	CCCCCCE	EEEECEE	G.CCCCCCE	G.EEEECEE
a8.17*	G	CCCCCCC	CCCCECC	G.CCCCCCC	G.CCCCECC
a8.18	G	ECCCCCE	CEEECEE	G.ECCCCCE	G.CEEECEE
a8.18*	G	ECCCCCC	ECCCECC	G.ECCCCCC	G.ECCCECC
a8.19	G	CECCCCE	ECEECEE	G.CECCCCE	G.ECEECEE
a8.19*	G	CECCCCC	CECCECC	G.CECCCCC	G.CECCECC
a8.20	G	EECCCCE	CCEECEE	G.EECCCCE	G.CCEECEE
a8.20*	G	EECCCCC	EECCECC	G.EECCCCC	G.EECCECC
a8.21	G	ECECCCE	EEEECEC	G.ECECCCE	G.EEEECEC
a8.21*	G	CCECCCC	CCCCECE	G.CCECCCC	G.CCCCECE
a8.22	G	CCECCCE	CEEECEC	G.CCECCCE	G.CEEECEC
a8.22*	G	ECECCCC	ECCCECE	G.ECECCCC	G.ECCCECE
a8.23	G	EEECCCE	ECEECEC	G.EEECCCE	G.ECEECEC
a8.23*	G	CEECCCC	CECCECE	G.CEECCCC	G.CECCECE
a8.24	G	CEECCCE	CCEECEC	G.CEECCCE	G.CCEECEC
a8.24*	G	EEECCCC	EECCECE	G.EEECCCC	G.EECCECE
a8.25	G	CCCECCE	EEEECCE	G.CCCECCE	G.EEEECCE
a8.25*	G	CCCECCC	CCCCEEC	G.CCCECCC	G.CCCCEEC
a8.26	G	ECCECCE	CEEECCE	G.ECCECCE	G.CEEECCE
a8.26*	G	ECCECCC	CECCEEC	G.ECCECCC	G.CECCEEC
a8.27	G	CECECCE	ECEECCE	G.CECECCE	G.ECEECCE
a8.27*	G	CECECCC	CECCEEC	G.CECECCC	G.CECCEEC
a8.28	G	EECECCE	CCEECCE	G.EECECCE	G.CCEECCE
a8.28*	G	EECECCC	EECCEEC	G.EECECCC	G.EECCEEC
a8.29	G	CEEECCE	EEEECCC	G.CEEECCE	G.EEEECCC
a8.29*	G	CCEECCC	CCCCEEE	G.CCEECCC	G.CCCCEEE
a8.30	G	EEEECCE	CEEECCC	G.EEEECCE	G.CEEECCC
a8.30*	G	ECEECCC	ECCCEEE	G.ECEECCC	G.ECCCEEE
a8.31	G	CCEECCE	ECEECCC	G.CCEECCE	G.ECEECCC
a8.31*	G	CEEECCC	CECCEEE	G.CEEECCC	G.CECCEEE
a8.32	G	ECEECCE	CCEECCC	G.ECEECCE	G.CCEECCC
a8.32*	G	EEEECCC	EECCEEE	G.EEEECCC	G.EECCEEE
A8.5	G	EEEEECE	EEEEEEC	G.EEEEECE	G.EEEEEEC
A8.6	G	CEEEECE	CEEEEEC	G.CEEEECE	G.CEEEEEC
A8.7	G	CCEEECE	ECEEEEC	G.CCEEECE	G.ECEEEEC
A8.7*	G	CCECECC	CECCCCC	G.CCECECC	G.CECCCCC
A8.8	G	ECEEECE	CCEEEEC	G.ECEEECE	G.CCEEEEC
A8.8*	G	ECECECC	EECCCCE	G.ECECECC	G.EECCCCE
AB2	A	E	E	A.E	A.E
AB2*	A	C	C	A.C	A.C
B3	B	EE	EC	B.EE	B.EC
B3*	B	EC	CE	B.EC	B.CE
B4.1	C	EEE	ECE	C.EEE	C.ECE
B4.1*	C	EEC	CEC	C.EEC	C.CEC
b4.2	C	CEE	ECC	C.CEE	C.ECC
b4.2*	C	CEC	CEE	C.CEC	C.CEE
B5.1	D	CEEE	ECEE	D.CEEE	D.ECEE
B5.1*	D	EEEC	CECC	D.EEEC	D.CECC
B5.2	D	EEEE	ECEC	D.EEEE	D.ECEC
B5.2*	D	CEEC	CECE	D.CEEC	D.CECE
b5.3	D	CCEE	EECE	D.CCEE	D.EECE
b5.3*	D	CCEC	CEEC	D.CCEC	D.CEEC
b5.4	D	ECEE	EECC	D.ECEE	D.EECC
b5.4*	D	ECEC	CEEE	D.ECEC	D.CEEE
B6.1	E	CCEEE	ECEEE	E.CCEEE	E.ECEEE
B6.1*	E	CEEEC	CECCC	E.CEEEC	E.CECCC
B6.2	E	ECEEE	ECEEC	E.ECEEE	E.ECEEC
B6.2*	E	EEEEC	CECCE	E.EEEEC	E.CECCE
B6.3	E	CEEEE	ECECE	E.CEEEE	E.ECECE
B6.3*	E	CCEEC	CECEC	E.CCEEC	E.CECEC
B6.4	E	EEEEE	ECECC	E.EEEEE	E.ECECC
B6.4*	E	ECEEC	CECEE	E.ECEEC	E.CECEE
b6.5	E	ECCEE	ECCEE	E.ECCEE	E.ECCEE
b6.5*	E	ECCEC	CEECC	E.ECCEC	E.CEECC
b6.6	E	CCCEE	ECCEC	E.CCCEE	E.ECCEC
b6.6*	E	CCCEC	CEECE	E.CCCEC	E.CEECE
b6.7	E	CECEE	ECCCE	E.CECEE	E.ECCCE
b6.7*	E	CECEC	CEEEC	E.CECEC	E.CEEEC
b6.8	E	EECEE	ECCCC	E.EECEE	E.ECCCC
b6.8*	E	EECEC	CEEEE	E.EECEC	E.CEEEE
B7.1	F	CCCEEE	EECEEE	F.CCCEEE	F.EECEEE
B7.1*	F	CCEEEC	CCECCC	F.CCEEEC	F.CCECCC
b7.10	F	EECCEE	CECCEE	F.EECCEE	F.CECCEE
b7.10*	F	ECCCEC	ECEECC	F.ECCCEC	F.ECEECC
b7.11	F	CCCCEE	EECCEC	F.CCCCEE	F.EECCEC
b7.11*	F	CECCEC	CCEECE	F.CECCEC	F.CCEECE
b7.12	F	ECCCEE	CECCEC	F.ECCCEE	F.CECCEC
b7.12*	F	EECCEC	ECEECE	F.EECCEC	F.ECEECE
b7.13	F	CCECEE	EECCCE	F.CCECEE	F.EECCCE
b7.13*	F	CCECEC	CCEEEC	F.CCECEC	F.CCEEEC
b7.14	F	ECECEE	CECCCE	F.ECECEE	F.CECCCE
b7.14*	F	ECECEC	ECEEEC	F.ECECEC	F.ECEEEC
b7.15	F	EEECEE	EECCCC	F.EEECEE	F.EECCCC
b7.15*	F	CEECEC	CCEEEE	F.CEECEC	F.CCEEEE
b7.16	F	CEECEE	CECCCC	F.CEECEE	F.CECCCC
b7.16*	F	EEECEC	ECEEEE	F.EEECEC	F.ECEEEE
B7.2	F	ECCEEE	CECEEE	F.ECCEEE	F.CECEEE
B7.2*	F	ECEEEC	ECECCC	F.ECEEEC	F.ECECCC
B7.3	F	CECEEE	EECEEC	F.CECEEE	F.EECEEC
B7.3*	F	CEEEEC	CCECCE	F.CEEEEC	F.CCECCE
B7.4	F	EECEEE	CECEEC	F.EECEEE	F.CECEEC
B7.4*	F	EEEEEC	ECECCE	F.EEEEEC	F.ECECCE
B7.5	F	ECECEEE	EECECE	F.ECECEEE	F.EECECE
B7.5*	F	ECEEEEC	CCECEC	F.ECEEEEC	F.CCECEC
B7.6	F	CCECEEE	CECECE	F.CCECEEE	F.CECECE
B7.6*	F	CCEEEEC	ECECEC	F.CCEEEEC	F.ECECEC
B7.7	F	CEECEEE	EECECC	F.CEECEEE	F.EECECC
B7.7*	F	CEEEEEC	CCECEE	F.CEEEEEC	F.CCECEE
B7.8	F	EEECEEE	CECECC	F.EEECEEE	F.CECECC
B7.8*	F	EEEEEEC	ECECEE	F.EEEEEEC	F.ECECEE
b7.9	F	CECCEE	EECCEE	F.CECCEE	F.EECCEE
b7.9*	F	CCCCEC	CCEECC	F.CCCCEC	F.CCEECC
b8.17	G	CCECCEE	ECECCEE	G.CCECCEE	G.ECECCEE
b8.17*	G	CCCCCEC	CCCEECC	G.CCCCCEC	G.CCCEECC
b8.18	G	ECECCEE	CCECCEE	G.ECECCEE	G.CCECCEE
b8.18*	G	ECCCCEC	ECCEECC	G.ECCCCEC	G.ECCEECC
b8.19	G	CEECCEE	ECECCEE	G.CEECCEE	G.ECECCEE
b8.19*	G	CECCCEC	CECEECC	G.CECCCEC	G.CECEECC
b8.20	G	EEECCEE	CCECCEE	G.EEECCEE	G.CCECCEE
b8.20*	G	EECCCEC	EECEECC	G.EECCCEC	G.EECEECC
b8.21	G	CCCCCEE	EEECCEC	G.CCCCCEE	G.EEECCEC
b8.21*	G	CCECCEC	CCCEECE	G.CCECCEC	G.CCCEECE
b8.22	G	ECCCCEE	CEECCEC	G.ECCCCEE	G.CEECCEC
b8.22*	G	ECECCEC	ECCEECE	G.ECECCEC	G.ECCEECE
b8.23	G	CECCCEE	ECECCEC	G.CECCCEE	G.ECECCEC
b8.23*	G	CEECCEC	CECEECE	G.CEECCEC	G.CECEECE
b8.24	G	EECCCEE	CCECCEC	G.EECCCEE	G.CCECCEC
b8.24*	G	EEECCEC	EECEECE	G.EEECCEC	G.EECEECE
b8.25	G	CCCECEE	EEECCCE	G.CCCECEE	G.EEECCCE
b8.25*	G	CCCECEC	CCCEEEC	G.CCCECEC	G.CCCEEEC
b8.26	G	ECCECEE	CEECCCE	G.ECCECEE	G.CEECCCE
b8.26*	G	ECCECEC	ECCEEEC	G.ECCECEC	G.ECCEEEC
b8.27	G	CECECEE	ECECCCE	G.CECECEE	G.ECECCCE
b8.27*	G	CECECEC	CECEEEC	G.CECECEC	G.CECEEEC
b8.28	G	EECECEE	CCECCCE	G.EECECEE	G.CCECCCE
b8.28*	G	EECECEC	EECEEEC	G.EECECEC	G.EECEEEC
b8.29	G	CEEECEE	EEECCCC	G.CEEECEE	G.EEECCCC
b8.29*	G	CCEECEC	CCCEEEE	G.CCEECEC	G.CCCEEEE
b8.30	G	EEEECEE	CEECCCC	G.EEEECEE	G.CEECCCC
b8.30*	G	ECEECEC	ECCEEEE	G.ECEECEC	G.ECCEEEE
b8.31	G	CCEECEE	ECECCCC	G.CCEECEE	G.ECECCCC
b8.31*	G	CEEECEC	CECEEEE	G.CEEECEC	G.CECEEEE
b8.32	G	ECEECEE	CCECCCC	G.ECEECEE	G.CCECCCC
b8.32*	G	EEEECCE	EECEEEE	G.EEEECCE	G.EECEEEE
B8.5*	G	ECCEEC	CCCECCE	G.ECCEEC	G.CCCECCE
B8.6*	G	CCCEEC	ECCECCE	G.CCCEEC	G.ECCECCE

## Sheet: C-intestinalis-Hamming-subtree
	Counts			Probability
h	[0]	[1]	h	[0]	[1]
0	5	5	0	0.5	0.5
1	20	22	1	0.47619	0.52381
2	34	33	2	0.507463	0.492537
3	30	35	3	0.461538	0.538462
4	17	11	4	0.607143	0.392857
5	1	0	5	1	0
	Counts									Probability
h	[000]	[001]	[010]	[011]	[100]	[101]	[110]	[111]	h	[000]	[001]	[010]	[011]	[100]	[101]	[110]	[111]
0	0	1	0	2	2	0	0	2	0	0	0.142857	0	0.285714	0.285714	0	0	0.285714
1	5	6	5	4	3	7	6	4	1	0.125	0.15	0.125	0.1	0.075	0.175	0.15	0.1
2	8	8	12	5	9	8	8	8	2	0.121212	0.121212	0.181818	0.0757576	0.136364	0.121212	0.121212	0.121212
3	10	8	4	8	9	9	9	8	3	0.153846	0.123077	0.0615385	0.123077	0.138462	0.138462	0.138462	0.123077
4	1	4	7	5	1	3	4	3	4	0.0357143	0.142857	0.25	0.178571	0.0357143	0.107143	0.142857	0.107143
5	1	0	0	0	0	0	0	0	5	1	0	0	0	0	0	0	0
	Counts																																Probability
h	[00000]	[00001]	[00010]	[00011]	[00100]	[00101]	[00110]	[00111]	[01000]	[01001]	[010100]	[01011]	[01100]	[01101]	[01110]	[01111]	[10000]	[10001]	[10010]	[10011]	[10100]	[10110]	[10111]	[11000]	[11001]	[11010]	[11011]	[11100]	[11101]	[11110]	[11111]	h	[00000]	[00001]	[00010]	[00011]	[00100]	[00101]	[00110]	[00111]	[01000]	[01001]	[010100]	[01011]	[01100]	[01101]	[01110]	[01111]	[10000]
0	0	0	0	0	0	0	0	0	0	0	0	0	1	0	0	1	0	0	0	1	0	0	0	0	0	0	0	1	0	0	1	0	0	0	0	0	0	0	0	0	0	0	0	0	0.2	0	0	0.2	0
1	0	1	1	1	2	0	1	2	0	2	0	2	0	0	2	0	0	1	1	1	1	2	3	1	3	0	2	0	1	2	0	1	0	0.03125	0.03125	0.03125	0.0625	0	0.03125	0.0625	0	0.0625	0	0.0625	0	0	0.0625	0	0
2	1	2	2	3	3	3	2	0	2	3	1	3	2	0	2	1	1	1	3	3	3	1	0	1	3	1	3	3	1	3	1	2	0.0172414	0.0344828	0.0344828	0.0517241	0.0517241	0.0517241	0.0344828	0	0.0344828	0.0517241	0.0172414	0.0517241	0.0344828	0	0.0344828	0.0172414	0.0172414
3	3	3	1	2	2	1	2	3	2	1	0	1	1	2	2	3	3	3	0	2	3	2	3	2	1	1	2	1	2	2	2	3	0.0517241	0.0517241	0.0172414	0.0344828	0.0344828	0.0172414	0.0344828	0.0517241	0.0344828	0.0172414	0	0.0172414	0.0172414	0.0344828	0.0344828	0.0517241	0.0517241
4	0	1	0	0	1	0	2	1	2	2	2	1	2	2	1	0	0	1	0	0	1	2	0	2	0	2	0	1	1	1	0	4	0	0.0357143	0	0	0.0357143	0	0.0714286	0.0357143	0.0714286	0.0714286	0.0714286	0.0357143	0.0714286	0.0714286	0.0357143	0	0
5	0	0	0	1	0	0	0	0	0	0	0	0	0	0	0	0	0	0	0	0	0	0	0	0	0	0	0	0	0	0	0	5	0	0	0	1	0	0	0	0	0	0	0	0	0	0	0	0	0
[truncated: 14 more columns]
