# Supplementary material for: Quantifying Mosaic Development: Towards an Evo-Devo Postmodern Synthesis of the Evolution of Development via Differentiation Trees of Embryos
Source: Preprints.org preprint supplement (doi:10.20944/preprints201608.0108.v1), 2016-08-10
Supplement: Supplementary file 13 [file Supplemental-Table-S5.xlsx]

## Sheet: C-elegans-diff-code
Nomenclature	Hamming Distance	Composite Hamming Distance	Lineage Depth	Differentiation Code	Composite Differentiation Code	Lineage Code
AB	0	1	1	[0]	[1]	[0]
ABa	1	2	2	[01]	[11]	[00]
ABal	2	3	3	[011]	[111]	[000]
ABala	2	3	4	[0110]	[1110]	[0000]
ABalaa	2	3	5	[01100]	[11100]	[00000]
ABalaaa	2	3	6	[011000]	[111000]	[000000]
ABalaaaa	2	3	7	[0110000]	[1110000]	[0000000]
ABalaaap	2	3	7	[0110001]	[1110001]	[0000001]
ABalaap	2	3	6	[011001]	[111001]	[000001]
ABalaapa	2	3	7	[0110010]	[1110010]	[0000010]
ABalaapp	2	3	7	[0110011]	[1110011]	[0000011]
ABalap	2	3	5	[01101]	[11101]	[00001]
ABalapa	2	3	6	[011010]	[111010]	[000010]
ABalapaa	3	4	7	[0110101]	[1110101]	[0000100]
ABalapap	3	4	7	[0110100]	[1110100]	[0000101]
ABalapp	2	3	6	[011011]	[111011]	[000011]
Abalappa	2	3	7	[0110110]	[1110110]	[0000110]
ABalappp	2	3	7	[0110111]	[1110111]	[0000111]
ABalp	2	3	4	[0111]	[1111]	[0001]
ABalpa	3	4	5	[01111]	[11111]	[00010]
ABalpaa	3	4	6	[011110]	[111110]	[000100]
ABalpaaa	3	4	7	[0111100]	[1111100]	[0001000]
ABalpaap	3	4	7	[0111101]	[1111101]	[0001001]
ABalpap	3	4	6	[011111]	[111111]	[000101]
ABalpapa	3	4	7	[0111110]	[1111110]	[0001010]
ABalpapp	3	4	7	[0111111]	[1111111]	[0001011]
ABalpp	3	4	5	[01110]	[11110]	[00011]
ABalppa	3	4	6	[011100]	[111100]	[000110]
ABalppaa	3	4	7	[0111000]	[1111000]	[0001100]
ABalppap	3	4	7	[0111001]	[1111001]	[0001101]
ABalppp	3	4	6	[011101]	[111101]	[000111]
ABalpppa	3	4	7	[0111010]	[1111010]	[0001110]
ABalpppp	3	4	7	[0111011]	[1111011]	[0001111]
ABar	2	3	3	[010]	[110]	[001]
ABara	2	3	4	[0100]	[1100]	[0010]
ABaraa	3	4	5	[01001]	[11001]	[00100]
ABaraaa	4	5	6	[010011]	[110011]	[001000]
ABaraaaa	4	5	7	[0100110]	[1100110]	[0010000]
ABaraaap	4	5	7	[0100111]	[1100111]	[0010001]
ABaraap	4	5	6	[010010]	[110010]	[001001]
ABaraapa	5	6	7	[0100101]	[1100101]	[0010010]
ABaraapp	5	6	7	[0100100]	[1100100]	[0010011]
ABarap	3	4	5	[01000]	[11000]	[00101]
ABarapa	4	5	6	[010001]	[110001]	[001010]
ABarapaa	4	5	7	[0100010]	[1100010]	[0010100]
ABarapap	4	5	7	[0100011]	[1100011]	[0010101]
ABarapp	4	5	6	[010000]	[110000]	[001011]
ABarappa	4	5	7	[0100000]	[1100000]	[0010110]
ABarappp	4	5	7	[0100001]	[1100001]	[0010111]
ABarp	2	3	4	[0101]	[1101]	[0011]
ABarpa	3	4	5	[01011]	[11011]	[00110]
ABarpaa	4	5	6	[010111]	[110111]	[001100]
ABarpaaa	4	5	7	[0101110]	[1101110]	[0010100]
ABarpaap	4	5	7	[0101111]	[1101111]	[0010101]
ABarpap	4	5	6	[010110]	[110110]	[001101]
ABarpapa	4	5	7	[0101100]	[1101100]	[0011010]
ABarpapp	4	5	7	[0101101]	[1101101]	[0011011]
ABarpp	3	4	5	[01010]	[11010]	[00111]
ABarppa	3	4	6	[010100]	[110100]	[001110]
ABarppaa	4	5	7	[0101001]	[1101001]	[0011100]
ABarppap	4	5	7	[0101000]	[1101000]	[0011101]
ABarppp	3	4	6	[010101]	[110101]	[001111]
ABarpppa	3	4	7	[0101010]	[1101010]	[0011110]
ABarpppp	3	4	7	[0101011]	[1101011]	[0011111]
ABp	1	2	2	[00]	[10]	[01]
ABpl	1	2	3	[000]	[100]	[010]
ABpla	1	2	4	[0000]	[1000]	[0100]
ABplaa	2	3	5	[00001]	[10001]	[01000]
ABplaaa	2	3	6	[000010]	[100010]	[010000]
ABplaaaa	3	4	7	[0000101]	[1000101]	[0100000]
ABplaaap	3	4	7	[0000100]	[1000100]	[0100001]
ABplaap	2	3	6	[000011]	[100011]	[010001]
ABplaapa	2	3	7	[0000110]	[1000110]	[0100010]
ABplaapp	2	3	7	[0000111]	[1000111]	[0100011]
ABplap	2	3	5	[00000]	[10000]	[01001]
ABplapa	2	3	6	[000000]	[100000]	[010010]
ABplapaa	2	3	7	[0000000]	[1000000]	[0100100]
ABplapap	2	3	7	[0000001]	[1000001]	[0100101]
ABplapp	2	3	6	[000001]	[100001]	[010011]
ABplappa	3	4	7	[0000011]	[1000011]	[0100110]
ABplappp	3	4	7	[0000010]	[1000010]	[0100111]
ABplp	1	2	4	[0001]	[1001]	[0101]
ABplpa	2	3	5	[00011]	[10011]	[01010]
ABplpaa	2	3	6	[000110]	[100110]	[010100]
ABplpaaa	2	3	7	[0001100]	[1001100]	[0101000]
ABplpaap	2	3	7	[0001101]	[1001101]	[0101001]
ABplpap	2	3	6	[000111]	[100111]	[010101]
ABplpapa	2	3	7	[0001110]	[1001110]	[0101010]
ABplpapp	2	3	7	[0001111]	[1001111]	[0101011]
ABplpp	2	3	5	[00010]	[10010]	[01011]
ABplppa	2	3	6	[000100]	[100100]	[010110]
ABplppaa	2	3	7	[0001000]	[1001000]	[0101100]
ABplppap	2	3	7	[0001001]	[1001001]	[0101101]
ABplppp	2	3	6	[000101]	[100101]	[010111]
ABplpppa	2	3	7	[0001010]	[1001010]	[0101110]
ABplpppp	2	3	7	[0001011]	[1001011]	[0101111]
ABpr	1	2	3	[001]	[101]	[011]
ABpra	2	3	4	[0011]	[1011]	[0110]
ABpraa	3	4	5	[00111]	[10111]	[01100]
ABpraaa	3	4	6	[001110]	[101110]	[011000]
ABpraaaa	3	4	7	[0011100]	[1011100]	[0110000]
ABpraaap	3	4	7	[0011101]	[1011101]	[0110001]
ABpraap	3	4	6	[001111]	[101111]	[011001]
ABpraapa	3	4	7	[0011110]	[1011110]	[0110010]
ABpraapp	3	4	7	[0011111]	[1011111]	[0110011]
ABprap	3	4	5	[00110]	[10110]	[01101]
ABprapa	4	5	6	[001101]	[101101]	[011010]
ABprapaa	5	6	7	[0011010]	[1011010]	[0110101]
ABprapap	4	5	7	[0011011]	[1011011]	[011011]
ABprapp	4	5	6	[001100]	[101100]	[0110110]
ABprappa	4	5	7	[0011001]	[1011001]	[0110111]
ABprappp	1	2	7	[0011000]	[1011000]	[0111]
ABprp	2	3	4	[0010]	[1010]	[01110]
ABprpa	2	3	5	[00100]	[10100]	[011100]
ABprpaa	2	3	6	[001000]	[101000]	[0111000]
ABprpaaa	3	4	7	[0010000]	[1010000]	[0111001]
ABprpaap	4	5	7	[0010001]	[1010001]	[011101]
ABprpap	2	3	6	[001001]	[101001]	[0111010]
ABprpapa	3	4	7	[0010010]	[1010010]	[0111011]
ABprpapp	5	6	7	[0010011]	[1010011]	[01111]
ABprpp	2	3	5	[00101]	[10101]	[011110]
ABprppa	2	3	6	[001010]	[101010]	[0111100]
ABprppaa	3	4	7	[0010100]	[1010100]	[0111101]
ABprppap	4	5	7	[0010101]	[1010101]	[011111]
ABprppp	2	3	6	[001011]	[101011]	[0111110]
ABprpppa	3	4	7	[0010110]	[1010110]	[0111111]
ABprpppp	6	7	7	[0010111]	[1010111]	[110]
C	0	2	3	[110]	[000]	[1100]
Ca	1	3	4	[1101]	[0001]	[11000]
Caa	1	3	5	[11010]	[00010]	[110000]
Caaa	2	4	6	[110101]	[000101]	[1100000]
Caaaa	3	5	7	[1101010]	[0001010]	[1100001]
Caaap	2	4	7	[1101011]	[0001011]	[110001]
Caap	2	4	6	[110100]	[000100]	[11001]
Cap	1	3	5	[11011]	[00011]	[110010]
Capa	1	3	6	[110111]	[000111]	[110011]
Capp	2	4	6	[110110]	[000110]	[1100110]
Cappa	3	5	7	[1101100]	[0001100]	[1100111]
Cappp	2	4	7	[1101101]	[0001101]	[1101]
Cp	1	3	4	[1100]	[0000]	[11010]
Cpa	2	4	5	[11001]	[00001]	[110100]
Cpaa	3	5	6	[110011]	[000011]	[1101000]
Cpaaa	4	6	7	[1100110]	[0000110]	[1101001]
Cpaap	3	5	7	[1100111]	[0000111]	[110101]
Cpap	4	6	6	[110010]	[000010]	[1101011]
Cpapa	4	6	7	[1100101]	[0000101]	[1101010]
Cpapp	1	3	7	[1100100]	[0000100]	[11011]
Cpp	2	4	5	[11000]	[00000]	[110110]
Cppa	2	4	6	[110000]	[000000]	[1101100]
Cppaa	3	5	7	[1100000]	[0000000]	[1101101]
Cppap	4	6	7	[1100001]	[0000001]	[110111]
Cppp	2	4	6	[110001]	[000001]	[1101110]
Cpppa	3	5	7	[1100010]	[0000010]	[1101111]
Cpppp	3	5	7	[1100011]	[0000011]	[1110]
D	1	3	4	[1111]	[0011]	[11100]
Da	2	4	5	[11111]	[00111]	[111000]
Daa	4	6	6	[111111]	[001111]	[1110001]
Daaa	2	4	7	[1111110]	[0011110]	[111001]
Daap	3	5	7	[1111111]	[0011111]	[1110010]
Dap	4	6	6	[111110]	[001110]	[1110011]
Dapa	1	3	7	[1111100]	[0011100]	[11101]
Dapp	2	4	7	[1111101]	[0011101]	[111010]
Dp	2	4	5	[11110]	[00110]	[1110100]
Dpa	3	5	6	[111100]	[001100]	[1110101]
Dpaa	3	5	7	[1111000]	[0011000]	[111011]
Dpap	4	6	7	[1111001]	[0011001]	[1110110]
Dpp	3	5	6	[111101]	[001101]	[1110111]
Dppa	4	6	7	[1111010]	[0011010]	[100]
Dppp	5	7	7	[1111011]	[0011011]	[1000]
E	1	3	3	[101]	[011]	[10000]
Ea	1	3	4	[1010]	[0110]	[100000]
Eal	2	4	5	[10101]	[01101]	[1000000]
Eala	3	5	6	[101011]	[011011]	[1000000]
Ealaa	2	4	7	[1010110]	[0110110]	[100001]
Ealap	3	5	7	[1010111]	[0110111]	[10001]
Ealp	1	3	6	[101010]	[011010]	[100010]
Ear	3	5	5	[10100]	[01100]	[1000101]
Eara	3	5	6	[101000]	[011000]	[1000101]
Earaa	3	5	7	[1010000]	[0110000]	[100011]
Earap	2	4	7	[1010001]	[0110001]	[10]
Earp	3	5	6	[101001]	[011001]	[1001]
EMS	1	2	2	[10]	[01]	[10010]
Ep	1	3	4	[1011]	[0111]	[100100]
Epl	3	5	5	[10111]	[01111]	[100101]
Epla	2	4	6	[101111]	[011111]	[1001010]
Eplp	4	6	6	[101110]	[011110]	[1001011]
Eplpa	1	3	7	[1011100]	[0111100]	[10011]
Eplpp	2	4	7	[1011101]	[0111101]	[100110]
Epr	2	4	5	[10110]	[01110]	[1001100]
Epra	4	6	6	[101101]	[011101]	[1001101]
Epraa	2	4	7	[1011010]	[0111010]	[100111]
Eprap	3	5	7	[1011011]	[0111011]	[1001110]
Eprp	4	6	6	[101100]	[011100]	[1001111]
Eprpa	1	3	7	[1011000]	[0111000]	[101]
Eprpp	2	4	7	[1011001]	[0111001]	[1010]
MS	1	3	3	[100]	[010]	[10100]
MSa	2	4	4	[1001]	[0101]	[101000]
MSaa	3	5	5	[10011]	[01011]	[1010000]
MSaaa	5	7	6	[100111]	[010111]	[1010001]
MSaaaa	4	6	7	[1001111]	[0101111]	[101001]
MSaaap	3	5	7	[1001110]	[0101110]	[1010010]
MSaap	4	6	6	[100110]	[010110]	[1010010]
MSaapa	4	6	7	[1001101]	[0101101]	[1010011]
MSaapp	5	7	7	[1001100]	[0101100]	[1010011]
MSap	3	5	5	[10010]	[01010]	[10101]
MSapa	3	5	6	[100100]	[010100]	[101010]
MSapaa	3	5	7	[1001000]	[0101000]	[1010100]
MSapap	3	5	7	[1001001]	[0101001]	[1010101]
MSapp	3	5	6	[100101]	[010101]	[101011]
MSappa	3	5	7	[1001010]	[0101010]	[1010110]
MSappp	3	5	7	[1001011]	[0101011]	[1010111]
MSp	2	4	4	[1000]	[0100]	[1011]
MSpa	3	5	5	[10001]	[01001]	[10110]
MSpaa	3	5	6	[100010]	[010010]	[101100]
MSpaaa	4	6	7	[1000101]	[0100101]	[1011000]
MSpaap	4	6	7	[1000100]	[0100100]	[1011001]
MSpap	3	5	6	[100011]	[010011]	[101101]
MSpapa	4	6	7	[1000111]	[0100111]	[1011010]
MSpapp	4	6	7	[1000110]	[0100110]	[1011011]
MSpp	3	5	5	[10000]	[01000]	[10111]
MSppa	4	6	6	[100001]	[010001]	[101110]
MSppaa	4	6	7	[1000010]	[0100010]	[1011100]
MSppap	4	6	7	[1000011]	[0100011]	[1011101]
MSppp	4	6	6	[100000]	[010000]	[101111]
MSpppa	4	6	7	[1000000]	[0100000]	[1011110]
MSpppp	4	6	7	[1000001]	[0100001]	[1011111]
P1	0	1	1	[1]	[0]	[1]
P2	0	2	2	[11]	[00]	[11]
P3	0	2	3	[111]	[001]	[111]
P4	2	4	4	[1110]	[0010]	[1111]

## Sheet: C-elegans CAST code
Nomenclature	Lineage Depth	Differentiation Code	Composite Differentiation Code	Lineage Code	CAST Code -- Differentiation Code	CAST Code -- Composite Differentiation Code	CAST Code -- Lineage Code
AB	A	C	E	C	A.C	A.E	A.C
ABa	B	CE	EE	CC	B.CE	B.EE	B.CC
ABal	C	CEE	EEE	CCC	C.CEE	C.EEE	C.CCC
ABala	D	CEEC	EEEC	CCCC	D.CEEC	D.EEEC	D.CCCC
ABalaa	E	CEECC	EEECC	CCCCC	E.CEECC	E.EEECC	E.CCCCC
ABalaaa	F	CEECCC	EEECCC	CCCCCC	F.CEECCC	F.EEECCC	F.CCCCCC
ABalaaaa	G	CEECCCC	EEECCCC	CCCCCCC	G.CEECCCC	G.EEECCCC	G.CCCCCCC
ABalaaap	G	CEECCCE	EEECCCE	CCCCCCE	G.CEECCCE	G.EEECCCE	G.CCCCCCE
ABalaap	F	CEECCE	EEECCE	CCCCCE	F.CEECCE	F.EEECCE	F.CCCCCE
ABalaapa	G	CEECCEC	EEECCEC	CCCCCEC	G.CEECCEC	G.EEECCEC	G.CCCCCEC
ABalaapp	G	CEECCEE	EEECCEE	CCCCCEE	G.CEECCEE	G.EEECCEE	G.CCCCCEE
ABalap	E	CEECE	EEECE	CCCCE	E.CEECE	E.EEECE	E.CCCCE
ABalapa	F	CEECEC	EEECEC	CCCCEC	F.CEECEC	F.EEECEC	F.CCCCEC
ABalapaa	G	CEECECE	EEECECE	CCCCECC	G.CEECECE	G.EEECECE	G.CCCCECC
ABalapap	G	CEECECC	EEECECC	CCCCECE	G.CEECECC	G.EEECECC	G.CCCCECE
ABalapp	F	CEECEE	EEECEE	CCCCEE	F.CEECEE	F.EEECEE	F.CCCCEE
Abalappa	G	CEECEEC	EEECEEC	CCCCEEC	G.CEECEEC	G.EEECEEC	G.CCCCEEC
ABalappp	G	CEECEEE	EEECEEE	CCCCEEE	G.CEECEEE	G.EEECEEE	G.CCCCEEE
ABalp	D	CEEE	EEEE	CCCE	D.CEEE	D.EEEE	D.CCCE
ABalpa	E	CEEEE	EEEEE	CCCEC	E.CEEEE	E.EEEEE	E.CCCEC
ABalpaa	F	CEEEEC	EEEEEC	CCCECC	F.CEEEEC	F.EEEEEC	F.CCCECC
ABalpaaa	G	CEEEECC	EEEEECC	CCCECCC	G.CEEEECC	G.EEEEECC	G.CCCECCC
ABalpaap	G	CEEEECE	EEEEECE	CCCECCE	G.CEEEECE	G.EEEEECE	G.CCCECCE
ABalpap	F	CEEEEE	EEEEEE	CCCECE	F.CEEEEE	F.EEEEEE	F.CCCECE
ABalpapa	G	CEEEEEC	EEEEEEC	CCCECEC	G.CEEEEEC	G.EEEEEEC	G.CCCECEC
ABalpapp	G	CEEEEEE	EEEEEEE	CCCECEE	G.CEEEEEE	G.EEEEEEE	G.CCCECEE
ABalpp	E	CEEEC	EEEEC	CCCEE	E.CEEEC	E.EEEEC	E.CCCEE
ABalppa	F	CEEECC	EEEECC	CCCEEC	F.CEEECC	F.EEEECC	F.CCCEEC
ABalppaa	G	CEEECCC	EEEECCC	CCCEECC	G.CEEECCC	G.EEEECCC	G.CCCEECC
ABalppap	G	CEEECCE	EEEECCE	CCCEECE	G.CEEECCE	G.EEEECCE	G.CCCEECE
ABalppp	F	CEEECE	EEEECE	CCCEEE	F.CEEECE	F.EEEECE	F.CCCEEE
ABalpppa	G	CEEECEC	EEEECEC	CCCEEEC	G.CEEECEC	G.EEEECEC	G.CCCEEEC
ABalpppp	G	CEEECEE	EEEECEE	CCCEEEE	G.CEEECEE	G.EEEECEE	G.CCCEEEE
ABar	C	CEC	EEC	CCE	C.CEC	C.EEC	C.CCE
ABara	D	CECC	EECC	CCEC	D.CECC	D.EECC	D.CCEC
ABaraa	E	CECCE	EECCE	CCECC	E.CECCE	E.EECCE	E.CCECC
ABaraaa	F	CECCEE	EECCEE	CCECCC	F.CECCEE	F.EECCEE	F.CCECCC
ABaraaaa	G	CECCEEC	EECCEEC	CCECCCC	G.CECCEEC	G.EECCEEC	G.CCECCCC
ABaraaap	G	CECCEEE	EECCEEE	CCECCCE	G.CECCEEE	G.EECCEEE	G.CCECCCE
ABaraap	F	CECCEC	EECCEC	CCECCE	F.CECCEC	F.EECCEC	F.CCECCE
ABaraapa	G	CECCECE	EECCECE	CCECCEC	G.CECCECE	G.EECCECE	G.CCECCEC
ABaraapp	G	CECCECC	EECCECC	CCECCEE	G.CECCECC	G.EECCECC	G.CCECCEE
ABarap	E	CECCC	EECCC	CCECE	E.CECCC	E.EECCC	E.CCECE
ABarapa	F	CECCCE	EECCCE	CCECEC	F.CECCCE	F.EECCCE	F.CCECEC
ABarapaa	G	CECCCEC	EECCCEC	CCECECC	G.CECCCEC	G.EECCCEC	G.CCECECC
ABarapap	G	CECCCEE	EECCCEE	CCECECE	G.CECCCEE	G.EECCCEE	G.CCECECE
ABarapp	F	CECCCC	EECCCC	CCECEE	F.CECCCC	F.EECCCC	F.CCECEE
ABarappa	G	CECCCCC	EECCCCC	CCECEEC	G.CECCCCC	G.EECCCCC	G.CCECEEC
ABarappp	G	CECCCCE	EECCCCE	CCECEEE	G.CECCCCE	G.EECCCCE	G.CCECEEE
ABarp	D	CECE	EECE	CCEE	D.CECE	D.EECE	D.CCEE
ABarpa	E	CECEE	EECEE	CCEEC	E.CECEE	E.EECEE	E.CCEEC
ABarpaa	F	CECEEE	EECEEE	CCEECC	F.CECEEE	F.EECEEE	F.CCEECC
ABarpaaa	G	CECEEEC	EECEEEC	CCECECC	G.CECEEEC	G.EECEEEC	G.CCECECC
ABarpaap	G	CECEEEE	EECEEEE	CCECECE	G.CECEEEE	G.EECEEEE	G.CCECECE
ABarpap	F	CECEEC	EECEEC	CCEECE	F.CECEEC	F.EECEEC	F.CCEECE
ABarpapa	G	CECEECC	EECEECC	CCEECEC	G.CECEECC	G.EECEECC	G.CCEECEC
ABarpapp	G	CECEECE	EECEECE	CCEECEE	G.CECEECE	G.EECEECE	G.CCEECEE
ABarpp	E	CECEC	EECEC	CCEEE	E.CECEC	E.EECEC	E.CCEEE
ABarppa	F	CECECC	EECECC	CCEEEC	F.CECECC	F.EECECC	F.CCEEEC
ABarppaa	G	CECECCE	EECECCE	CCEEECC	G.CECECCE	G.EECECCE	G.CCEEECC
ABarppap	G	CECECCC	EECECCC	CCEEECE	G.CECECCC	G.EECECCC	G.CCEEECE
ABarppp	F	CECECE	EECECE	CCEEEE	F.CECECE	F.EECECE	F.CCEEEE
ABarpppa	G	CECECEC	EECECEC	CCEEEEC	G.CECECEC	G.EECECEC	G.CCEEEEC
ABarpppp	G	CECECEE	EECECEE	CCEEEEE	G.CECECEE	G.EECECEE	G.CCEEEEE
ABp	B	CC	EC	CE	B.CC	B.EC	B.CE
ABpl	C	CCC	ECC	CEC	C.CCC	C.ECC	C.CEC
ABpla	D	CCCC	ECCC	CECC	D.CCCC	D.ECCC	D.CECC
ABplaa	E	CCCCE	ECCCE	CECCC	E.CCCCE	E.ECCCE	E.CECCC
ABplaaa	F	CCCCEC	ECCCEC	CECCCC	F.CCCCEC	F.ECCCEC	F.CECCCC
ABplaaaa	G	CCCCECE	ECCCECE	CECCCCC	G.CCCCECE	G.ECCCECE	G.CECCCCC
ABplaaap	G	CCCCECC	ECCCECC	CECCCCE	G.CCCCECC	G.ECCCECC	G.CECCCCE
ABplaap	F	CCCCEE	ECCCEE	CECCCE	F.CCCCEE	F.ECCCEE	F.CECCCE
ABplaapa	G	CCCCEEC	ECCCEEC	CECCCEC	G.CCCCEEC	G.ECCCEEC	G.CECCCEC
ABplaapp	G	CCCCEEE	ECCCEEE	CECCCEE	G.CCCCEEE	G.ECCCEEE	G.CECCCEE
ABplap	E	CCCCC	ECCCC	CECCE	E.CCCCC	E.ECCCC	E.CECCE
ABplapa	F	CCCCCC	ECCCCC	CECCEC	F.CCCCCC	F.ECCCCC	F.CECCEC
ABplapaa	G	CCCCCCC	ECCCCCC	CECCECC	G.CCCCCCC	G.ECCCCCC	G.CECCECC
ABplapap	G	CCCCCCE	ECCCCCE	CECCECE	G.CCCCCCE	G.ECCCCCE	G.CECCECE
ABplapp	F	CCCCCE	ECCCCE	CECCEE	F.CCCCCE	F.ECCCCE	F.CECCEE
ABplappa	G	CCCCCEE	ECCCCEE	CECCEEC	G.CCCCCEE	G.ECCCCEE	G.CECCEEC
ABplappp	G	CCCCCEC	ECCCCEC	CECCEEE	G.CCCCCEC	G.ECCCCEC	G.CECCEEE
ABplp	D	CCCE	ECCE	CECE	D.CCCE	D.ECCE	D.CECE
ABplpa	E	CCCEE	ECCEE	CECEC	E.CCCEE	E.ECCEE	E.CECEC
ABplpaa	F	CCCEEC	ECCEEC	CECECC	F.CCCEEC	F.ECCEEC	F.CECECC
ABplpaaa	G	CCCEECC	ECCEECC	CECECCC	G.CCCEECC	G.ECCEECC	G.CECECCC
ABplpaap	G	CCCEECE	ECCEECE	CECECCE	G.CCCEECE	G.ECCEECE	G.CECECCE
ABplpap	F	CCCEEE	ECCEEE	CECECE	F.CCCEEE	F.ECCEEE	F.CECECE
ABplpapa	G	CCCEEEC	ECCEEEC	CECECEC	G.CCCEEEC	G.ECCEEEC	G.CECECEC
ABplpapp	G	CCCEEEE	ECCEEEE	CECECEE	G.CCCEEEE	G.ECCEEEE	G.CECECEE
ABplpp	E	CCCEC	ECCEC	CECEE	E.CCCEC	E.ECCEC	E.CECEE
ABplppa	F	CCCECC	ECCECC	CECEEC	F.CCCECC	F.ECCECC	F.CECEEC
ABplppaa	G	CCCECCC	ECCECCC	CECEECC	G.CCCECCC	G.ECCECCC	G.CECEECC
ABplppap	G	CCCECCE	ECCECCE	CECEECE	G.CCCECCE	G.ECCECCE	G.CECEECE
ABplppp	F	CCCECE	ECCECE	CECEEE	F.CCCECE	F.ECCECE	F.CECEEE
ABplpppa	G	CCCECEC	ECCECEC	CECEEEC	G.CCCECEC	G.ECCECEC	G.CECEEEC
ABplpppp	G	CCCECEE	ECCECEE	CECEEEE	G.CCCECEE	G.ECCECEE	G.CECEEEE
ABpr	C	CCE	ECE	CEE	C.CCE	C.ECE	C.CEE
ABpra	D	CCEE	ECEE	CEEC	D.CCEE	D.ECEE	D.CEEC
ABpraa	E	CCEEE	ECEEE	CEECC	E.CCEEE	E.ECEEE	E.CEECC
ABpraaa	F	CCEEEC	ECEEEC	CEECCC	F.CCEEEC	F.ECEEEC	F.CEECCC
ABpraaaa	G	CCEEECC	ECEEECC	CEECCCC	G.CCEEECC	G.ECEEECC	G.CEECCCC
ABpraaap	G	CCEEECE	ECEEECE	CEECCCE	G.CCEEECE	G.ECEEECE	G.CEECCCE
ABpraap	F	CCEEEE	ECEEEE	CEECCE	F.CCEEEE	F.ECEEEE	F.CEECCE
ABpraapa	G	CCEEEEC	ECEEEEC	CEECCEC	G.CCEEEEC	G.ECEEEEC	G.CEECCEC
ABpraapp	G	CCEEEEE	ECEEEEE	CEECCEE	G.CCEEEEE	G.ECEEEEE	G.CEECCEE
ABprap	E	CCEEC	ECEEC	CEECE	E.CCEEC	E.ECEEC	E.CEECE
ABprapa	F	CCEECE	ECEECE	CEECEC	F.CCEECE	F.ECEECE	F.CEECEC
ABprapaa	G	CCEECEC	ECEECEC	CEECECE	G.CCEECEC	G.ECEECEC	G.CEECECE
ABprapap	G	CCEECEE	ECEECEE	CEECEE	G.CCEECEE	G.ECEECEE	G.CEECEE
ABprapp	F	CCEECC	ECEECC	CEECEEC	F.CCEECC	F.ECEECC	F.CEECEEC
ABprappa	G	CCEECCE	ECEECCE	CEECEEE	G.CCEECCE	G.ECEECCE	G.CEECEEE
ABprappp	G	CCEECCC	ECEECCC	CEEE	G.CCEECCC	G.ECEECCC	G.CEEE
ABprp	D	CCEC	ECEC	CEEEC	D.CCEC	D.ECEC	D.CEEEC
ABprpa	E	CCECC	ECECC	CEEECC	E.CCECC	E.ECECC	E.CEEECC
ABprpaa	F	CCECCC	ECECCC	CEEECCC	F.CCECCC	F.ECECCC	F.CEEECCC
ABprpaaa	G	CCECCCC	ECECCCC	CEEECCE	G.CCECCCC	G.ECECCCC	G.CEEECCE
ABprpaap	G	CCECCCE	ECECCCE	CEEECE	G.CCECCCE	G.ECECCCE	G.CEEECE
ABprpap	F	CCECCE	ECECCE	CEEECEC	F.CCECCE	F.ECECCE	F.CEEECEC
ABprpapa	G	CCECCEC	ECECCEC	CEEECEE	G.CCECCEC	G.ECECCEC	G.CEEECEE
ABprpapp	G	CCECCEE	ECECCEE	CEEEE	G.CCECCEE	G.ECECCEE	G.CEEEE
ABprpp	E	CCECE	ECECE	CEEEEC	E.CCECE	E.ECECE	E.CEEEEC
ABprppa	F	CCECEC	ECECEC	CEEEECC	F.CCECEC	F.ECECEC	F.CEEEECC
ABprppaa	G	CCECECC	ECECECC	CEEEECE	G.CCECECC	G.ECECECC	G.CEEEECE
ABprppap	G	CCECECE	ECECECE	CEEEEE	G.CCECECE	G.ECECECE	G.CEEEEE
ABprppp	F	CCECEE	ECECEE	CEEEEEC	F.CCECEE	F.ECECEE	F.CEEEEEC
ABprpppa	G	CCECEEC	ECECEEC	CEEEEEE	G.CCECEEC	G.ECECEEC	G.CEEEEEE
ABprpppp	G	CCECEEE	ECECEEE	EEC	G.CCECEEE	G.ECECEEE	G.EEC
C	C	EEC	CCC	EECC	C.EEC	C.CCC	C.EECC
Ca	D	EECE	CCCE	EECCC	D.EECE	D.CCCE	D.EECCC
Caa	E	EECEC	CCCEC	EECCCC	E.EECEC	E.CCCEC	E.EECCCC
Caaa	F	EECECE	CCCECE	EECCCCC	F.EECECE	F.CCCECE	F.EECCCCC
Caaaa	G	EECECEC	CCCECEC	EECCCCE	G.EECECEC	G.CCCECEC	G.EECCCCE
Caaap	G	EECECEE	CCCECEE	EECCCE	G.EECECEE	G.CCCECEE	G.EECCCE
Caap	F	EECECC	CCCECC	EECCE	F.EECECC	F.CCCECC	F.EECCE
Cap	E	EECEE	CCCEE	EECCEC	E.EECEE	E.CCCEE	E.EECCEC
Capa	F	EECEEE	CCCEEE	EECCEE	F.EECEEE	F.CCCEEE	F.EECCEE
Capp	F	EECEEC	CCCEEC	EECCEEC	F.EECEEC	F.CCCEEC	F.EECCEEC
Cappa	G	EECEECC	CCCEECC	EECCEEE	G.EECEECC	G.CCCEECC	G.EECCEEE
Cappp	G	EECEECE	CCCEECE	EECE	G.EECEECE	G.CCCEECE	G.EECE
Cp	D	EECC	CCCC	EECEC	D.EECC	D.CCCC	D.EECEC
Cpa	E	EECCE	CCCCE	EECECC	E.EECCE	E.CCCCE	E.EECECC
Cpaa	F	EECCEE	CCCCEE	EECECCC	F.EECCEE	F.CCCCEE	F.EECECCC
Cpaaa	G	EECCEEC	CCCCEEC	EECECCE	G.EECCEEC	G.CCCCEEC	G.EECECCE
Cpaap	G	EECCEEE	CCCCEEE	EECECE	G.EECCEEE	G.CCCCEEE	G.EECECE
Cpap	F	EECCEC	CCCCEC	EECECEE	F.EECCEC	F.CCCCEC	F.EECECEE
Cpapa	G	EECCECE	CCCCECE	EECECEC	G.EECCECE	G.CCCCECE	G.EECECEC
Cpapp	G	EECCECC	CCCCECC	EECEE	G.EECCECC	G.CCCCECC	G.EECEE
Cpp	E	EECCC	CCCCC	EECEEC	E.EECCC	E.CCCCC	E.EECEEC
Cppa	F	EECCCC	CCCCCC	EECEECC	F.EECCCC	F.CCCCCC	F.EECEECC
Cppaa	G	EECCCCC	CCCCCCC	EECEECE	G.EECCCCC	G.CCCCCCC	G.EECEECE
Cppap	G	EECCCCE	CCCCCCE	EECEEE	G.EECCCCE	G.CCCCCCE	G.EECEEE
Cppp	F	EECCCE	CCCCCE	EECEEEC	F.EECCCE	F.CCCCCE	F.EECEEEC
Cpppa	G	EECCCEC	CCCCCEC	EECEEEE	G.EECCCEC	G.CCCCCEC	G.EECEEEE
Cpppp	G	EECCCEE	CCCCCEE	EEEC	G.EECCCEE	G.CCCCCEE	G.EEEC
D	D	EEEE	CCEE	EEECC	D.EEEE	D.CCEE	D.EEECC
Da	E	EEEEE	CCEEE	EEECCC	E.EEEEE	E.CCEEE	E.EEECCC
Daa	F	EEEEEE	CCEEEE	EEECCCE	F.EEEEEE	F.CCEEEE	F.EEECCCE
Daaa	G	EEEEEEC	CCEEEEC	EEECCE	G.EEEEEEC	G.CCEEEEC	G.EEECCE
Daap	G	EEEEEEE	CCEEEEE	EEECCEC	G.EEEEEEE	G.CCEEEEE	G.EEECCEC
Dap	F	EEEEEC	CCEEEC	EEECCEE	F.EEEEEC	F.CCEEEC	F.EEECCEE
Dapa	G	EEEEECC	CCEEECC	EEECE	G.EEEEECC	G.CCEEECC	G.EEECE
Dapp	G	EEEEECE	CCEEECE	EEECEC	G.EEEEECE	G.CCEEECE	G.EEECEC
Dp	E	EEEEC	CCEEC	EEECECC	E.EEEEC	E.CCEEC	E.EEECECC
Dpa	F	EEEECC	CCEECC	EEECECE	F.EEEECC	F.CCEECC	F.EEECECE
Dpaa	G	EEEECCC	CCEECCC	EEECEE	G.EEEECCC	G.CCEECCC	G.EEECEE
Dpap	G	EEEECCE	CCEECCE	EEECEEC	G.EEEECCE	G.CCEECCE	G.EEECEEC
Dpp	F	EEEECE	CCEECE	EEECEEE	F.EEEECE	F.CCEECE	F.EEECEEE
Dppa	G	EEEECEC	CCEECEC	ECC	G.EEEECEC	G.CCEECEC	G.ECC
Dppp	G	EEEECEE	CCEECEE	ECCC	G.EEEECEE	G.CCEECEE	G.ECCC
E	C	ECE	CEE	ECCCC	C.ECE	C.CEE	C.ECCCC
Ea	D	ECEC	CEEC	ECCCCC	D.ECEC	D.CEEC	D.ECCCCC
Eal	E	ECECE	CEECE	ECCCCCC	E.ECECE	E.CEECE	E.ECCCCCC
Eala	F	ECECEE	CEECEE	ECCCCCC	F.ECECEE	F.CEECEE	F.ECCCCCC
Ealaa	G	ECECEEC	CEECEEC	ECCCCE	G.ECECEEC	G.CEECEEC	G.ECCCCE
Ealap	G	ECECEEE	CEECEEE	ECCCE	G.ECECEEE	G.CEECEEE	G.ECCCE
Ealp	F	ECECEC	CEECEC	ECCCEC	F.ECECEC	F.CEECEC	F.ECCCEC
Ear	E	ECECC	CEECC	ECCCECE	E.ECECC	E.CEECC	E.ECCCECE
Eara	F	ECECCC	CEECCC	ECCCECE	F.ECECCC	F.CEECCC	F.ECCCECE
Earaa	G	ECECCCC	CEECCCC	ECCCEE	G.ECECCCC	G.CEECCCC	G.ECCCEE
Earap	G	ECECCCE	CEECCCE	EC	G.ECECCCE	G.CEECCCE	G.EC
Earp	F	ECECCE	CEECCE	ECCE	F.ECECCE	F.CEECCE	F.ECCE
EMS	B	EC	CE	ECCEC	B.EC	B.CE	B.ECCEC
Ep	D	ECEE	CEEE	ECCECC	D.ECEE	D.CEEE	D.ECCECC
Epl	E	ECEEE	CEEEE	ECCECE	E.ECEEE	E.CEEEE	E.ECCECE
Epla	F	ECEEEE	CEEEEE	ECCECEC	F.ECEEEE	F.CEEEEE	F.ECCECEC
Eplp	F	ECEEEC	CEEEEC	ECCECEE	F.ECEEEC	F.CEEEEC	F.ECCECEE
Eplpa	G	ECEEECC	CEEEECC	ECCEE	G.ECEEECC	G.CEEEECC	G.ECCEE
Eplpp	G	ECEEECE	CEEEECE	ECCEEC	G.ECEEECE	G.CEEEECE	G.ECCEEC
Epr	E	ECEEC	CEEEC	ECCEECC	E.ECEEC	E.CEEEC	E.ECCEECC
Epra	F	ECEECE	CEEECE	ECCEECE	F.ECEECE	F.CEEECE	F.ECCEECE
Epraa	G	ECEECEC	CEEECEC	ECCEEE	G.ECEECEC	G.CEEECEC	G.ECCEEE
Eprap	G	ECEECEE	CEEECEE	ECCEEEC	G.ECEECEE	G.CEEECEE	G.ECCEEEC
Eprp	F	ECEECC	CEEECC	ECCEEEE	F.ECEECC	F.CEEECC	F.ECCEEEE
Eprpa	G	ECEECCC	CEEECCC	ECE	G.ECEECCC	G.CEEECCC	G.ECE
Eprpp	G	ECEECCE	CEEECCE	ECEC	G.ECEECCE	G.CEEECCE	G.ECEC
MS	C	ECC	CEC	ECECC	C.ECC	C.CEC	C.ECECC
MSa	D	ECCE	CECE	ECECCC	D.ECCE	D.CECE	D.ECECCC
MSaa	E	ECCEE	CECEE	ECECCCC	E.ECCEE	E.CECEE	E.ECECCCC
MSaaa	F	ECCEEE	CECEEE	ECECCCE	F.ECCEEE	F.CECEEE	F.ECECCCE
MSaaaa	G	ECCEEEE	CECEEEE	ECECCE	G.ECCEEEE	G.CECEEEE	G.ECECCE
MSaaap	G	ECCEEEC	CECEEEC	ECECCEC	G.ECCEEEC	G.CECEEEC	G.ECECCEC
MSaap	F	ECCEEC	CECEEC	ECECCEC	F.ECCEEC	F.CECEEC	F.ECECCEC
MSaapa	G	ECCEECE	CECEECE	ECECCEE	G.ECCEECE	G.CECEECE	G.ECECCEE
MSaapp	G	ECCEECC	CECEECC	ECECCEE	G.ECCEECC	G.CECEECC	G.ECECCEE
MSap	E	ECCEC	CECEC	ECECE	E.ECCEC	E.CECEC	E.ECECE
MSapa	F	ECCECC	CECECC	ECECEC	F.ECCECC	F.CECECC	F.ECECEC
MSapaa	G	ECCECCC	CECECCC	ECECECC	G.ECCECCC	G.CECECCC	G.ECECECC
MSapap	G	ECCECCE	CECECCE	ECECECE	G.ECCECCE	G.CECECCE	G.ECECECE
MSapp	F	ECCECE	CECECE	ECECEE	F.ECCECE	F.CECECE	F.ECECEE
MSappa	G	ECCECEC	CECECEC	ECECEEC	G.ECCECEC	G.CECECEC	G.ECECEEC
MSappp	G	ECCECEE	CECECEE	ECECEEE	G.ECCECEE	G.CECECEE	G.ECECEEE
MSp	D	ECCC	CECC	ECEE	D.ECCC	D.CECC	D.ECEE
MSpa	E	ECCCE	CECCE	ECEEC	E.ECCCE	E.CECCE	E.ECEEC
MSpaa	F	ECCCEC	CECCEC	ECEECC	F.ECCCEC	F.CECCEC	F.ECEECC
MSpaaa	G	ECCCECE	CECCECE	ECEECCC	G.ECCCECE	G.CECCECE	G.ECEECCC
MSpaap	G	ECCCECC	CECCECC	ECEECCE	G.ECCCECC	G.CECCECC	G.ECEECCE
MSpap	F	ECCCEE	CECCEE	ECEECE	F.ECCCEE	F.CECCEE	F.ECEECE
MSpapa	G	ECCCEEE	CECCEEE	ECEECEC	G.ECCCEEE	G.CECCEEE	G.ECEECEC
MSpapp	G	ECCCEEC	CECCEEC	ECEECEE	G.ECCCEEC	G.CECCEEC	G.ECEECEE
MSpp	E	ECCCC	CECCC	ECEEE	E.ECCCC	E.CECCC	E.ECEEE
MSppa	F	ECCCCE	CECCCE	ECEEEC	F.ECCCCE	F.CECCCE	F.ECEEEC
MSppaa	G	ECCCCEC	CECCCEC	ECEEECC	G.ECCCCEC	G.CECCCEC	G.ECEEECC
MSppap	G	ECCCCEE	CECCCEE	ECEEECE	G.ECCCCEE	G.CECCCEE	G.ECEEECE
MSppp	F	ECCCCC	CECCCC	ECEEEE	F.ECCCCC	F.CECCCC	F.ECEEEE
MSpppa	G	ECCCCCC	CECCCCC	ECEEEEC	G.ECCCCCC	G.CECCCCC	G.ECEEEEC
MSpppp	G	ECCCCCE	CECCCCE	ECEEEEE	G.ECCCCCE	G.CECCCCE	G.ECEEEEE
P1	A	E	C	E	A.E	A.C	A.E
P2	B	EE	CC	EE	B.EE	B.CC	B.EE
P3	C	EEE	CCE	EEE	C.EEE	C.CCE	C.EEE
P4	D	EEEC	CCEC	EEEE	D.EEEC	D.CCEC	D.EEEE

## Sheet: C-elegans-Hamming-subtree
	Counts			Probability
h	[0]	[1]	h	[0]	[1]
0	1	4	0	0.00793651	0.038835
1	7	16	1	0.0555556	0.15534
2	50	24	2	0.396825	0.23301
3	40	32	3	0.31746	0.31068
4	24	24	4	0.190476	0.23301
5	4	3	5	0.031746	0.0291262
	Counts									Probability
h	[000]	[001]	[010]	[011]	[100]	[101]	[110]	[111]	h	[000]	[001]	[010]	[011]	[100]	[101]	[110]	[111]
0	0	0	0	1	0	1	1	1	0	0	0	0	0.03125	0	0.0294118	0.0384615	0.0625
1	0	1	3	2	6	2	6	2	1	0	0.03125	0.0967742	0.0625	0.24	0.0588235	0.230769	0.125
2	15	3	24	9	6	3	9	5	2	0.483871	0.09375	0.774194	0.28125	0.24	0.0882353	0.346154	0.3125
3	16	8	4	12	8	13	6	5	3	0.516129	0.25	0.129032	0.375	0.32	0.382353	0.230769	0.3125
4	0	18	0	6	4	13	4	3	4	0	0.5625	0	0.1875	0.16	0.382353	0.153846	0.1875
5	0	2	0	2	1	2	0	0	5	0	0.0625	0	0.0625	0.04	0.0588235	0	0
	Counts																															Probability
h	[00000]	[00001]	[00010]	[00011]	[00100]	[00101]	[00110]	[00111]	[01000]	[01001]	[01010]	[01011]	[01100]	[01101]	[01110]	[01111]	[11000]	[11001]	[11010]	[11011]	[11100]	[11101]	[10000]	[10001]	[10010]	[10011]	[10100]	[10101]	[10110]	[10111]	h	[00000]	[00001]	[00010]	[00011]	[00100]	[00101]	[00110]	[00111]	[01000]	[01001]	[01010]	[01011]	[01100]	[01101]	[01110]	[01111]	[11000]	[11001]
0	0	0	0	0	0	0	0	0	0	0	0	0	0	0	0	0	0	0	0	0	0	0	0	0	0	0	0	0	0	2	0	0	0	0	0	0	0	0	0	0	0	0	0	0	0	0	0	0	0
1	0	0	0	0	0	0	1	3	1	1	1	1	1	1	0	2	5	4	2	3	2	3	2	1	2	1	1	0	0	0	1	0	0	0	0	0	0	0.0666667	0.2	0.0666667	0.0666667	0.0666667	0.0666667	0.0666667	0.0666667	0	0.153846	0.333333	0.266667
2	7	6	1	2	1	1	0	3	10	12	14	8	1	4	7	6	6	5	4	5	4	4	2	0	1	3	1	1	0	0	2	1	0.4	0.0666667	0.133333	0.0666667	0.0666667	0	0.2	0.666667	0.8	0.933333	0.533333	0.0666667	0.266667	0.5	0.461538	0.4	0.333333
3	0	9	14	8	2	2	6	7	4	2	0	6	8	3	4	3	3	3	5	4	4	5	1	4	1	0	2	8	4	1	3	0	0.6	0.933333	0.533333	0.133333	0.133333	0.4	0.466667	0.266667	0.133333	0	0.4	0.533333	0.2	0.285714	0.230769	0.2	0.2
4	0	0	0	4	10	12	8	2	0	0	0	0	4	5	2	1	1	3	4	3	4	2	0	0	1	1	3	0	5	6	4	0	0	0	0.266667	0.666667	0.8	0.533333	0.133333	0	0	0	0	0.266667	0.333333	0.142857	0.0769231	0.0666667	0.2
5	0	0	0	1	2	0	0	0	0	0	0	0	1	2	1	1	0	0	0	0	1	1	0	0	0	0	2	0	0	0	5	0	0	0	0.0666667	0.133333	0	0	0	0	0	0	0	0.0666667	0.133333	0.0714286	0.0769231	0	0
[truncated: 12 more columns]
