# Supplementary material for: Quantifying Mosaic Development: Towards an Evo-Devo Postmodern Synthesis of the Evolution of Development via Differentiation Trees of Embryos
Source: Preprints.org preprint supplement (doi:10.20944/preprints201608.0108.v1), 2016-08-10
Supplement: Supplementary file 16 [file Supplemental-Table-S6.xlsx]

## Sheet: Extract CAST Code Axolotl
Observed Tissues, Axolotl	Differentiation Code	CAST Code
Endoderm	[0]	A.C
Animal Cap	[1]	A.E
Undefined Tissue	[10]	B.EC
Ectoderm	[11]	B.EE
Mesoderm	[101]	C.ECE
Neural Ectoderm	[110]	C.EEC
Epithelial Ectoderm	[111]	C.EEE
Somites	[1010]	D.ECEC
Lateral Mesoderm	[1011]	D.ECEE
Notochord	[10100]	E.ECECC
Tailbud Mesoderm	[101010]	F.ECECEC
Undefined Tissue	[10101]	E.ECECE
Undefined Tissue	[00]	B.CC
Yolk Mass Endoderm	[001]	C.CCE
Pharyngeal Endoderm	[000]	C.CCC
Prechordal Plate	[0010]	D.CCEC

## Sheet: Ciona-C-elegans-diff-code-align
CAST Code, Differentiation Code, C. intestinalis	CAST Code, Differentiation Code, C. elegans	C. intestinalis (match/gap)	C. elegans (match/gap)		SCORE
A.C	A.C	1	1	1	1
A.E	A.E	1	1	1	2
B.CC	B.CC	1	1	1	3
B.CE	B.CE	1	1	1	4
B.EC	B.EC	1	1	1	5
B.EE	B.EE	1	1	1	6
C.CCC	C.CCC	1	1	1	7
C.CCE	C.CCE	1	1	1	8
C.CEC	C.CEC	1	1	1	9
C.CEE	C.CEE	1	1	1	10
C.ECC	C.ECC	1	1	1	11
C.ECE	C.ECE	1	1	1	12
C.EEC	C.EEC	1	1	1	13
C.EEE	C.EEE	1	1	1	14
D.CCCC	D.CCCC	1	1	1	15
D.CCEC	D.CCCE	1	1	1	16
D.CCEC	D.CCEC	1	1	1	17
D.CCEE	D.CCEE	1	1	1	18
D.CECC	D.CECC	1	1	1	19
D.CECE	D.CECE	1	1	1	20
D.CEEC	D.CEEC	1	1	1	21
D.CEEE	D.CEEE	1	1	1	22
D.ECCC	D.ECCC	1	1	1	23
D.ECCE	D.ECCE	1	1	1	24
D.ECEC	D.ECEC	1	1	1	25
D.ECEE	D.ECEE	1	1	1	26
D.EECC	D.EECC	1	1	1	27
D.EECE	D.EECE	1	1	1	28
D.EEEC	D.EEEC	1	1	1	29
D.EEEE	D.EEEE	1	1	1	30
E.CCCCC	E.CCCCC	1	1	1	31
E.CCCCE	E.CCCCE	1	1	1	32
E.CCCEC	E.CCCEC	1	1	1	33
E.CCCEE	E.CCCEE	1	1	1	34
E.CCECC	E.CCECC	1	1	1	35
E.CCECE	E.CCECE	1	1	1	36
E.CCEEC	E.CCEEC	1	1	1	37
E.CCEEE	E.CCEEE	1	1	1	38
E.CECCC	E.CECCC	1	1	1	39
E.CECCE	E.CECCE	1	1	1	40
E.CECEC	E.CECEC	1	1	1	41
E.CECEE	E.CECEE	1	1	1	42
E.CEECC	E.CEECC	1	1	1	43
E.CEECE	E.CEECE	1	1	1	44
E.CEEEC	E.CEEEC	1	1	1	45
E.CEEEE	E.CEEEE	1	1	1	46
E.ECCCC	E.ECCCC	1	1	1	47
E.ECCCE	E.ECCCE	1	1	1	48
E.ECCEC	E.ECCEC	1	1	1	49
E.ECCEE	E.ECCEE	1	1	1	50
E.ECECC	E.ECECC	1	1	1	51
E.ECECE	E.ECECE	1	1	1	52
E.ECEEC	E.ECEEC	1	1	1	53
E.ECEEE	E.ECEEE	1	1	1	54
E.EECCC	E.EECCC	1	1	1	55
E.EECCE	E.EECCE	1	1	1	56
E.EECEC	E.EECEC	1	1	1	57
E.EECEE	E.EECEE	1	1	1	58
E.EEECC	---	1	-1	-1	57
E.EEECE	---	1	-1	-1	56
E.EEEEC	E.EEEEC	1	1	1	57
E.EEEEE	E.EEEEE	1	1	1	58
F.CCCCCC	F.CCCCCC	1	1	1	59
F.CCCCCE	F.CCCCCE	1	1	1	60
F.CCCCEC	F.CCCCEC	1	1	1	61
F.CCCCEE	F.CCCCEE	1	1	1	62
F.CCCECC	F.CCCECC	1	1	1	63
F.CCCECE	F.CCCECE	1	1	1	64
---	F.CCCEEC	-1	1	-1	63
F.CCCEEE	F.CCCEEE	1	1	1	64
F.CCECCC	F.CCECCC	1	1	1	65
F.CCECCE	F.CCECCE	1	1	1	66
F.CCECEC	F.CCECEC	1	1	1	67
F.CCECEE	F.CCECEE	1	1	1	68
F.CCECEEE	---	1	-1	-1	67
F.CCEECC	F.CCEECC	1	1	1	68
F.CCEECE	F.CCEECE	1	1	1	69
F.CCEEEC	F.CCEEEC	1	1	1	70
---	F.CCEEEE	-1	1	-1	69
F.CCEEEEC	---	1	-1	-1	68
F.CECCCC	F.CECCCC	1	1	1	69
F.CECCCE	F.CECCCE	1	1	1	70
F.CECCEC	F.CECCEC	1	1	1	71
F.CECCEE	F.CECCEE	1	1	1	72
F.CECECC	F.CECECC	1	1	1	73
F.CECECE	F.CECECE	1	1	1	74
---	F.CECEEC	-1	1	-1	73
F.CECEEE	F.CECEEE	1	1	1	74
F.CEECCC	F.CEECCC	1	1	1	75
F.CEECCE	F.CEECCE	1	1	1	76
F.CEECEC	F.CEECEC	1	1	1	77
F.CEECEE	F.CEECEE	1	1	1	78
F.CEECEEE	---	1	-1	-1	77
F.CEEECC	F.CEEECC	1	1	1	78
F.CEEECE	F.CEEECE	1	1	1	79
F.CEEEEC	F.CEEEEC	1	1	1	80
---	F.CEEEEE	-1	1	-1	79
F.CEEEEEC	---	1	-1	-1	78
F.ECCCCC	F.ECCCCC	1	1	1	79
F.ECCCCE	F.ECCCCE	1	1	1	80
F.ECCCEC	F.ECCCEC	1	1	1	81
F.ECCCEE	F.ECCCEE	1	1	1	82
F.ECCECC	F.ECCECC	1	1	1	83
F.ECCECE	F.ECCECE	1	1	1	84
---	F.ECCEEC	-1	1	-1	83
F.ECCEEE	F.ECCEEE	1	1	1	84
F.ECECCC	F.ECECCC	1	1	1	85
F.ECECCE	F.ECECCE	1	1	1	86
F.ECECEC	F.ECECEC	1	1	1	87
F.ECECEE	F.ECECEE	1	1	1	88
F.ECECEEE	---	1	-1	-1	87
F.ECEECC	F.ECEECC	1	1	1	88
F.ECEECE	F.ECEECE	1	1	1	89
F.ECEEEC	F.ECEEEC	1	1	1	90
---	F.ECEEEE	-1	1	-1	89
F.ECEEEEC	---	1	-1	-1	88
F.EECCCC	F.EECCCC	1	1	1	89
F.EECCCE	F.EECCCE	1	1	1	90
F.EECCEC	F.EECCEC	1	1	1	91
F.EECCEE	F.EECCEE	1	1	1	92
F.EECECC	F.EECECC	1	1	1	93
F.EECECE	F.EECECE	1	1	1	94
---	F.EECEEC	-1	1	-1	93
F.EECEEE	F.EECEEE	1	1	1	94
F.EEECCC	---	1	-1	-1	93
F.EEECCE	---	1	-1	-1	92
F.EEECEC	---	1	-1	-1	91
F.EEECEE	---	1	-1	-1	90
F.EEECEEE	---	1	-1	-1	89
F.EEEECC	F.EEEECC	1	1	1	90
F.EEEECE	F.EEEECE	1	1	1	91
F.EEEEEC	F.EEEEEC	1	1	1	92
F.EEEEEEC	---	1	-1	-1	91
---	F.EEEEEE	-1	1	-1	90
G.CCCCCCC	G.CCCCCCC	1	1	1	91
G.CCCCCCE	G.CCCCCCE	1	1	1	92
G.CCCCCEC	G.CCCCCEC	1	1	1	93
G.CCCCCEE	G.CCCCCEE	1	1	1	94
---	G.CCCCECC	-1	1	-1	93
---	G.CCCCECE	-1	1	-1	92
---	G.CCCCEEC	-1	1	-1	91
---	G.CCCCEEE	-1	1	-1	90
G.CCCECCC	G.CCCECCC	1	1	1	91
G.CCCECCE	G.CCCECCE	1	1	1	92
G.CCCECEC	G.CCCECEC	1	1	1	93
G.CCCECEE	G.CCCECEE	1	1	1	94
G.CCCEEC	---	1	-1	-1	93
---	G.CCCEECC	-1	1	-1	92
---	G.CCCEECE	-1	1	-1	91
---	G.CCCEEEC	-1	1	-1	90
---	G.CCCEEEE	-1	1	-1	89
G.CCECCCC	G.CCECCCC	1	1	1	90
G.CCECCCE	G.CCECCCE	1	1	1	91
G.CCECCEC	G.CCECCEC	1	1	1	92
G.CCECCEE	G.CCECCEE	1	1	1	93
G.CCECECC	G.CCECECC	1	1	1	94
G.CCECECE	G.CCECECE	1	1	1	95
---	G.CCECEEC	-1	1	-1	94
---	G.CCECEEE	-1	1	-1	93
G.CCEECCC	G.CCEECCC	1	1	1	94
G.CCEECCE	G.CCEECCE	1	1	1	95
G.CCEECEC	G.CCEECEC	1	1	1	96
G.CCEECEE	G.CCEECEE	1	1	1	97
G.CCEEECC	G.CCEEECC	1	1	1	98
G.CCEEECE	G.CCEEECE	1	1	1	99
---	G.CCEEEEC	-1	1	-1	98
---	G.CCEEEEE	-1	1	-1	97
G.CECCCCC	G.CECCCCC	1	1	1	98
G.CECCCCE	G.CECCCCE	1	1	1	99
G.CECCCEC	G.CECCCEC	1	1	1	100
G.CECCCEE	G.CECCCEE	1	1	1	101
---	G.CECCECC	-1	1	-1	100
G.CECCECE	G.CECCECE	1	1	1	101
---	G.CECCEEC	-1	1	-1	100
---	G.CECCEEE	-1	1	-1	99
G.CECECCC	G.CECECCC	1	1	1	100
G.CECECCE	G.CECECCE	1	1	1	101
G.CECECEC	G.CECECEC	1	1	1	102
G.CECECEE	G.CECECEE	1	1	1	103
G.CECEECC	G.CECEECC	1	1	1	104
---	G.CECEECE	-1	1	-1	103
---	G.CECEEEC	-1	1	-1	102
---	G.CECEEEE	-1	1	-1	101
G.CEECCCC	G.CEECCCC	1	1	1	102
G.CEECCCE	G.CEECCCE	1	1	1	103
G.CEECCEC	G.CEECCEC	1	1	1	104
G.CEECCEE	G.CEECCEE	1	1	1	105
	G.CEECECC	1	1	1	106
G.CEECECE	G.CEECECE	1	1	1	107
	G.CEECEEC	1	1	1	108
	G.CEECEEE	1	1	1	109
G.CEEECCC	G.CEEECCC	1	1	1	110
G.CEEECCE	G.CEEECCE	1	1	1	111
G.CEEECEC	G.CEEECEC	1	1	1	112
G.CEEECEE	G.CEEECEE	1	1	1	113
G.CEEEECC	G.CEEEECC	1	1	1	114
G.CEEEECE	G.CEEEECE	1	1	1	115
	G.CEEEEEC	1	1	1	116
	G.CEEEEEE	1	1	1	117
G.ECCCCCC	G.ECCCCCC	1	1	1	118
G.ECCCCCE	G.ECCCCCE	1	1	1	119
G.ECCCCEC	G.ECCCCEC	1	1	1	120
G.ECCCCEE	G.ECCCCEE	1	1	1	121
	G.ECCCECC	1	1	1	122
	G.ECCCECE	1	1	1	123
	G.ECCCEEC	1	1	1	124
	G.ECCCEEE	1	1	1	125
G.ECCECCC	G.ECCECCC	1	1	1	126
G.ECCECCE	G.ECCECCE	1	1	1	127
G.ECCECEC	G.ECCECEC	1	1	1	128
G.ECCECEE	G.ECCECEE	1	1	1	129
---	G.ECCEECC	-1	1	-1	128
---	G.ECCEECE	-1	1	-1	127
---	G.ECCEEEC	-1	1	-1	126
---	G.ECCEEEE	-1	1	-1	125
G.ECECCCC	G.ECECCCC	1	1	1	126
G.ECECCCE	G.ECECCCE	1	1	1	127
G.ECECCEC	---	1	-1	-1	126
G.ECECCEE	---	1	-1	-1	125
G.ECECECC	---	1	-1	-1	124
G.ECECECE	---	1	-1	-1	123
---	G.ECECEEC	-1	1	-1	122
---	G.ECECEEE	-1	1	-1	121
G.ECEECCC	G.ECEECCC	1	1	1	122
G.ECEECCE	G.ECEECCE	1	1	1	123
G.ECEECEC	G.ECEECEC	1	1	1	124
G.ECEECEE	G.ECEECEE	1	1	1	125
G.ECEEECC	G.ECEEECC	1	1	1	126
G.ECEEECE	G.ECEEECE	1	1	1	127
G.EECCCCC	G.EECCCCC	1	1	1	128
G.EECCCCE	G.EECCCCE	1	1	1	129
G.EECCCEC	G.EECCCEC	1	1	1	130
G.EECCCEE	G.EECCCEE	1	1	1	131
---	G.EECCECC	-1	1	-1	130
G.EECCECE	G.EECCECE	1	1	1	131
---	G.EECCEEC	-1	1	-1	130
---	G.EECCEEE	-1	1	-1	129
G.EECECCC	---	1	-1	-1	128
G.EECECCE	---	1	-1	-1	127
G.EECECEC	G.EECECEC	1	1	1	128
G.EECECEE	G.EECECEE	1	1	1	129
G.EECEECC	G.EECEECC	1	1	1	130
---	G.EECEECE	-1	1	-1	129
G.EEECCCC	---	1	-1	-1	128
G.EEECCCE	---	1	-1	-1	127
G.EEECCEC	---	1	-1	-1	126
G.EEECCEE	---	1	-1	-1	125
G.EEECECE	---	1	-1	-1	124
G.EEEECCC	G.EEEECCC	1	1	1	125
G.EEEECCE	G.EEEECCE	1	1	1	126
G.EEEECEC	G.EEEECEC	1	1	1	127
G.EEEECEE	G.EEEECEE	1	1	1	128
G.EEEEECC	G.EEEEECC	1	1	1	129
G.EEEEECE	G.EEEEECE	1	1	1	130
---	G.EEEEEEC	-1	1	-1	129
---	G.EEEEEEE	-1	1	-1	128

## Sheet: Axolotl-Ciona-diff-code-align
CAST Code, Differentiation Code, C. intestinalis	CAST Code, Differentiation Code, Axolotl	C. intestinalis (match/gap)	Axolotl (match/gap)		SCORE
A.C	A.C	1	1	1	1
A.E	A.E	1	1	1	2
B.CC	B.CC	1	1	1	3
B.CE	---	1	-1	-1	2
B.EC	B.EC	1	1	1	3
B.EE	B.EE	1	1	1	4
C.CCC	C.CCC	1	1	1	5
C.CCE	C.CCE	1	1	1	6
C.CEC	---	1	-1	-1	5
C.CEE	---	1	-1	-1	4
C.ECC	---	1	-1	-1	3
C.ECE	C.ECE	1	1	1	4
C.EEC	C.EEC	1	1	1	5
C.EEE	C.EEE	1	1	1	6
D.CCCC	---	1	-1	-1	5
D.CCEC	D.CCEC	1	1	1	6
D.CCEC	---	1	-1	-1	5
D.CCEE	---	1	-1	-1	4
D.CECC	---	1	-1	-1	3
D.CECE	---	1	-1	-1	2
D.CEEC	---	1	-1	-1	1
D.CEEE	---	1	-1	-1	0
D.ECCC	---	1	-1	-1	-1
D.ECCE	---	1	-1	-1	-2
D.ECEC	D.ECEC	1	1	1	-1
D.ECEE	D.ECEE	1	1	1	0
D.EECC	---	1	-1	-1	-1
D.EECE	---	1	-1	-1	-2
D.EEEC	---	1	-1	-1	-3
D.EEEE	---	1	-1	-1	-4
E.CCCCC	---	1	-1	-1	-5
E.CCCCE	---	1	-1	-1	-6
E.CCCEC	---	1	-1	-1	-7
E.CCCEE	---	1	-1	-1	-8
E.CCECC	---	1	-1	-1	-9
E.CCECE	---	1	-1	-1	-10
E.CCEEC	---	1	-1	-1	-11
E.CCEEE	---	1	-1	-1	-12
E.CECCC	---	1	-1	-1	-13
E.CECCE	---	1	-1	-1	-14
E.CECEC	---	1	-1	-1	-15
E.CECEE	---	1	-1	-1	-16
E.CEECC	---	1	-1	-1	-17
E.CEECE	---	1	-1	-1	-18
E.CEEEC	---	1	-1	-1	-19
E.CEEEE	---	1	-1	-1	-20
E.ECCCC	---	1	-1	-1	-21
E.ECCCE	---	1	-1	-1	-22
E.ECCEC	---	1	-1	-1	-23
E.ECCEE	---	1	-1	-1	-24
E.ECECC	E.ECECC	1	1	1	-23
E.ECECE	E.ECECE	1	1	1	-22
E.ECEEC	---	1	-1	-1	-23
E.ECEEE	---	1	-1	-1	-24
E.EECCC	---	1	-1	-1	-25
E.EECCE	---	1	-1	-1	-26
E.EECEC	---	1	-1	-1	-27
E.EECEE	---	1	-1	-1	-28
E.EEECC	---	1	-1	-1	-29
E.EEECE	---	1	-1	-1	-30
E.EEEEC	---	1	-1	-1	-31
E.EEEEE	---	1	-1	-1	-32
F.CCCCCC	---	1	-1	-1	-33
F.CCCCCE	---	1	-1	-1	-34
F.CCCCEC	---	1	-1	-1	-35
F.CCCCEE	---	1	-1	-1	-36
F.CCCECC	---	1	-1	-1	-37
F.CCCECE	---	1	-1	-1	-38
F.CCCEEE	---	1	-1	-1	-39
F.CCECCC	---	1	-1	-1	-40
F.CCECCE	---	1	-1	-1	-41
F.CCECEC	---	1	-1	-1	-42
F.CCECEE	---	1	-1	-1	-43
F.CCECEEE	---	1	-1	-1	-44
F.CCEECC	---	1	-1	-1	-45
F.CCEECE	---	1	-1	-1	-46
F.CCEEEC	---	1	-1	-1	-47
F.CCEEEEC	---	1	-1	-1	-48
F.CECCCC	---	1	-1	-1	-49
F.CECCCE	---	1	-1	-1	-50
F.CECCEC	---	1	-1	-1	-51
F.CECCEE	---	1	-1	-1	-52
F.CECECC	---	1	-1	-1	-53
F.CECECE	---	1	-1	-1	-54
F.CECEEE	---	1	-1	-1	-55
F.CEECCC	---	1	-1	-1	-56
F.CEECCE	---	1	-1	-1	-57
F.CEECEC	---	1	-1	-1	-58
F.CEECEE	---	1	-1	-1	-59
F.CEECEEE	---	1	-1	-1	-60
F.CEEECC	---	1	-1	-1	-61
F.CEEECE	---	1	-1	-1	-62
F.CEEEEC	---	1	-1	-1	-63
F.CEEEEEC	---	1	-1	-1	-64
F.ECCCCC	---	1	-1	-1	-65
F.ECCCCE	---	1	-1	-1	-66
F.ECCCEC	---	1	-1	-1	-67
F.ECCCEE	---	1	-1	-1	-68
F.ECCECC	---	1	-1	-1	-69
F.ECCECE	---	1	-1	-1	-70
F.ECCEEE	---	1	-1	-1	-71
F.ECECCC	---	1	-1	-1	-72
F.ECECCE	---	1	-1	-1	-73
F.ECECEC	F.ECECEC	1	1	1	-72
F.ECECEE	---	1	-1	-1	-73
F.ECECEEE	---	1	-1	-1	-74
F.ECEECC	---	1	-1	-1	-75
F.ECEECE	---	1	-1	-1	-76
F.ECEEEC	---	1	-1	-1	-77
F.ECEEEEC	---	1	-1	-1	-78
F.EECCCC	---	1	-1	-1	-79
F.EECCCE	---	1	-1	-1	-80
F.EECCEC	---	1	-1	-1	-81
F.EECCEE	---	1	-1	-1	-82
F.EECECC	---	1	-1	-1	-83
F.EECECE	---	1	-1	-1	-84
F.EECEEE	---	1	-1	-1	-85
F.EEECCC	---	1	-1	-1	-86
F.EEECCE	---	1	-1	-1	-87
F.EEECEC	---	1	-1	-1	-88
F.EEECEE	---	1	-1	-1	-89
F.EEECEEE	---	1	-1	-1	-90
F.EEEECC	---	1	-1	-1	-91
F.EEEECE	---	1	-1	-1	-92
F.EEEEEC	---	1	-1	-1	-93
F.EEEEEEC	---	1	-1	-1	-94
G.CCCCCCC	---	1	-1	-1	-95
G.CCCCCCE	---	1	-1	-1	-96
G.CCCCCEC	---	1	-1	-1	-97
G.CCCCCEE	---	1	-1	-1	-98
G.CCCECCC	---	1	-1	-1	-99
G.CCCECCE	---	1	-1	-1	-100
G.CCCECEC	---	1	-1	-1	-101
G.CCCECEE	---	1	-1	-1	-102
G.CCCEEC	---	1	-1	-1	-103
G.CCECCCC	---	1	-1	-1	-104
G.CCECCCE	---	1	-1	-1	-105
G.CCECCEC	---	1	-1	-1	-106
G.CCECCEE	---	1	-1	-1	-107
G.CCECECC	---	1	-1	-1	-108
G.CCECECE	---	1	-1	-1	-109
G.CCEECCC	---	1	-1	-1	-110
G.CCEECCE	---	1	-1	-1	-111
G.CCEECEC	---	1	-1	-1	-112
G.CCEECEE	---	1	-1	-1	-113
G.CCEEECC	---	1	-1	-1	-114
G.CCEEECE	---	1	-1	-1	-115
G.CECCCCC	---	1	-1	-1	-116
G.CECCCCE	---	1	-1	-1	-117
G.CECCCEC	---	1	-1	-1	-118
G.CECCCEE	---	1	-1	-1	-119
G.CECCECE	---	1	-1	-1	-120
G.CECECCC	---	1	-1	-1	-121
G.CECECCE	---	1	-1	-1	-122
G.CECECEC	---	1	-1	-1	-123
G.CECECEE	---	1	-1	-1	-124
G.CECEECC	---	1	-1	-1	-125
G.CEECCCC	---	1	-1	-1	-126
G.CEECCCE	---	1	-1	-1	-127
G.CEECCEC	---	1	-1	-1	-128
G.CEECCEE	---	1	-1	-1	-129
G.CEECECE	---	1	-1	-1	-130
G.CEEECCC	---	1	-1	-1	-131
G.CEEECCE	---	1	-1	-1	-132
G.CEEECEC	---	1	-1	-1	-133
G.CEEECEE	---	1	-1	-1	-134
G.CEEEECC	---	1	-1	-1	-135
G.CEEEECE	---	1	-1	-1	-136
G.ECCCCCC	---	1	-1	-1	-137
G.ECCCCCE	---	1	-1	-1	-138
G.ECCCCEC	---	1	-1	-1	-139
G.ECCCCEE	---	1	-1	-1	-140
G.ECCECCC	---	1	-1	-1	-141
G.ECCECCE	---	1	-1	-1	-142
G.ECCECEC	---	1	-1	-1	-143
G.ECCECEE	---	1	-1	-1	-144
G.ECECCCC	---	1	-1	-1	-145
G.ECECCCE	---	1	-1	-1	-146
G.ECECCEC	---	1	-1	-1	-147
G.ECECCEE	---	1	-1	-1	-148
G.ECECECC	---	1	-1	-1	-149
G.ECECECE	---	1	-1	-1	-150
G.ECEECCC	---	1	-1	-1	-151
G.ECEECCE	---	1	-1	-1	-152
G.ECEECEC	---	1	-1	-1	-153
G.ECEECEE	---	1	-1	-1	-154
G.ECEEECC	---	1	-1	-1	-155
G.ECEEECE	---	1	-1	-1	-156
G.EECCCCC	---	1	-1	-1	-157
G.EECCCCE	---	1	-1	-1	-158
G.EECCCEC	---	1	-1	-1	-159
G.EECCCEE	---	1	-1	-1	-160
G.EECCECE	---	1	-1	-1	-161
G.EECECCC	---	1	-1	-1	-162
G.EECECCE	---	1	-1	-1	-163
G.EECECEC	---	1	-1	-1	-164
G.EECECEE	---	1	-1	-1	-165
G.EECEECC	---	1	-1	-1	-166
G.EEECCCC	---	1	-1	-1	-167
G.EEECCCE	---	1	-1	-1	-168
G.EEECCEC	---	1	-1	-1	-169
G.EEECCEE	---	1	-1	-1	-170
G.EEECECE	---	1	-1	-1	-171
G.EEEECCC	---	1	-1	-1	-172
G.EEEECCE	---	1	-1	-1	-173
G.EEEECEC	---	1	-1	-1	-174
G.EEEECEE	---	1	-1	-1	-175
G.EEEEECC	---	1	-1	-1	-176
G.EEEEECE	---	1	-1	-1	-177

## Sheet: Axolotl-C-elega-diff-code-align
CAST Code, Differentiation Code, C. elegans	CAST Code, Differentiation Code, Axolotl	C. elegans (match/gap)	Axolotl (match/gap)		SCORE
A.C	A.C	1	1	1	1
A.E	A.E	1	1	1	2
B.CC	B.CC	1	1	1	3
B.CE	---	1	-1	-1	2
B.EC	B.EC	1	1	1	3
B.EE	B.EE	1	1	1	4
C.CCC	C.CCC	1	1	1	5
C.CCE	C.CCE	1	1	1	6
C.CEC	---	1	-1	-1	5
C.CEE	---	1	-1	-1	4
C.ECC	---	1	-1	-1	3
C.ECE	C.ECE	1	1	1	4
C.EEC	C.EEC	1	1	1	5
C.EEE	C.EEE	1	1	1	6
D.CCCC	---	1	-1	-1	5
D.CCCE	---	1	-1	-1	4
D.CCEC	D.CCEC	1	1	1	5
D.CCEE	---	1	-1	-1	4
D.CECC	---	1	-1	-1	3
D.CECE	---	1	-1	-1	2
D.CEEC	---	1	-1	-1	1
D.CEEE	---	1	-1	-1	0
D.ECCC	---	1	-1	-1	-1
D.ECCE	---	1	-1	-1	-2
D.ECEC	D.ECEC	1	1	1	-1
D.ECEE	D.ECEE	1	1	1	0
D.EECC	---	1	-1	-1	-1
D.EECE	---	1	-1	-1	-2
D.EEEC	---	1	-1	-1	-3
D.EEEE	---	1	-1	-1	-4
E.CCCCC	---	1	-1	-1	-5
E.CCCCE	---	1	-1	-1	-6
E.CCCEC	---	1	-1	-1	-7
E.CCCEE	---	1	-1	-1	-8
E.CCECC	---	1	-1	-1	-9
E.CCECE	---	1	-1	-1	-10
E.CCEEC	---	1	-1	-1	-11
E.CCEEE	---	1	-1	-1	-12
E.CECCC	---	1	-1	-1	-13
E.CECCE	---	1	-1	-1	-14
E.CECEC	---	1	-1	-1	-15
E.CECEE	---	1	-1	-1	-16
E.CEECC	---	1	-1	-1	-17
E.CEECE	---	1	-1	-1	-18
E.CEEEC	---	1	-1	-1	-19
E.CEEEE	---	1	-1	-1	-20
E.ECCCC	---	1	-1	-1	-21
E.ECCCE	---	1	-1	-1	-22
E.ECCEC	---	1	-1	-1	-23
E.ECCEE	---	1	-1	-1	-24
E.ECECC	E.ECECC	1	1	1	-23
E.ECECE	E.ECECE	1	1	1	-22
E.ECEEC	---	1	-1	-1	-23
E.ECEEE	---	1	-1	-1	-24
E.EECCC	---	1	-1	-1	-25
E.EECCE	---	1	-1	-1	-26
E.EECEC	---	1	-1	-1	-27
E.EECEE	---	1	-1	-1	-28
---	---	-1	-1	-1	-29
---	---	-1	-1	-1	-30
E.EEEEC	---	1	-1	-1	-31
E.EEEEE	---	1	-1	-1	-32
F.CCCCCC	---	1	-1	-1	-33
F.CCCCCE	---	1	-1	-1	-34
F.CCCCEC	---	1	-1	-1	-35
F.CCCCEE	---	1	-1	-1	-36
F.CCCECC	---	1	-1	-1	-37
F.CCCECE	---	1	-1	-1	-38
F.CCCEEC	---	1	-1	-1	-39
F.CCCEEE	---	1	-1	-1	-40
F.CCECCC	---	1	-1	-1	-41
F.CCECCE	---	1	-1	-1	-42
F.CCECEC	---	1	-1	-1	-43
F.CCECEE	---	1	-1	-1	-44
---	---	-1	-1	-1	-45
F.CCEECC	---	1	-1	-1	-46
F.CCEECE	---	1	-1	-1	-47
F.CCEEEC	---	1	-1	-1	-48
F.CCEEEE	---	1	-1	-1	-49
---	---	-1	-1	-1	-50
F.CECCCC	---	1	-1	-1	-51
F.CECCCE	---	1	-1	-1	-52
F.CECCEC	---	1	-1	-1	-53
F.CECCEE	---	1	-1	-1	-54
F.CECECC	---	1	-1	-1	-55
F.CECECE	---	1	-1	-1	-56
F.CECEEC	---	1	-1	-1	-57
F.CECEEE	---	1	-1	-1	-58
F.CEECCC	---	1	-1	-1	-59
F.CEECCE	---	1	-1	-1	-60
F.CEECEC	---	1	-1	-1	-61
F.CEECEE	---	1	-1	-1	-62
---	---	-1	-1	-1	-63
F.CEEECC	---	1	-1	-1	-64
F.CEEECE	---	1	-1	-1	-65
F.CEEEEC	---	1	-1	-1	-66
F.CEEEEE	---	1	-1	-1	-67
---	---	-1	-1	-1	-68
F.ECCCCC	---	1	-1	-1	-69
F.ECCCCE	---	1	-1	-1	-70
F.ECCCEC	---	1	-1	-1	-71
F.ECCCEE	---	1	-1	-1	-72
F.ECCECC	---	1	-1	-1	-73
F.ECCECE	---	1	-1	-1	-74
F.ECCEEC	---	1	-1	-1	-75
F.ECCEEE	---	1	-1	-1	-76
F.ECECCC	---	1	-1	-1	-77
F.ECECCE	---	1	-1	-1	-78
F.ECECEC	F.ECECEC	1	1	1	-77
F.ECECEE	---	1	-1	-1	-78
---	---	-1	-1	-1	-79
F.ECEECC	---	1	-1	-1	-80
F.ECEECE	---	1	-1	-1	-81
F.ECEEEC	---	1	-1	-1	-82
F.ECEEEE	---	1	-1	-1	-83
---	---	-1	-1	-1	-84
F.EECCCC	---	1	-1	-1	-85
F.EECCCE	---	1	-1	-1	-86
F.EECCEC	---	1	-1	-1	-87
F.EECCEE	---	1	-1	-1	-88
F.EECECC	---	1	-1	-1	-89
F.EECECE	---	1	-1	-1	-90
F.EECEEC	---	1	-1	-1	-91
F.EECEEE	---	1	-1	-1	-92
---	---	-1	-1	-1	-93
---	---	-1	-1	-1	-94
---	---	-1	-1	-1	-95
---	---	-1	-1	-1	-96
---	---	-1	-1	-1	-97
F.EEEECC	---	1	-1	-1	-98
F.EEEECE	---	1	-1	-1	-99
F.EEEEEC	---	1	-1	-1	-100
---	---	-1	-1	-1	-101
F.EEEEEE	---	1	-1	-1	-102
G.CCCCCCC	---	1	-1	-1	-103
G.CCCCCCE	---	1	-1	-1	-104
G.CCCCCEC	---	1	-1	-1	-105
G.CCCCCEE	---	1	-1	-1	-106
G.CCCCECC	---	1	-1	-1	-107
G.CCCCECE	---	1	-1	-1	-108
G.CCCCEEC	---	1	-1	-1	-109
G.CCCCEEE	---	1	-1	-1	-110
G.CCCECCC	---	1	-1	-1	-111
G.CCCECCE	---	1	-1	-1	-112
G.CCCECEC	---	1	-1	-1	-113
G.CCCECEE	---	1	-1	-1	-114
---	---	-1	-1	-1	-115
G.CCCEECC	---	1	-1	-1	-116
G.CCCEECE	---	1	-1	-1	-117
G.CCCEEEC	---	1	-1	-1	-118
G.CCCEEEE	---	1	-1	-1	-119
G.CCECCCC	---	1	-1	-1	-120
G.CCECCCE	---	1	-1	-1	-121
G.CCECCEC	---	1	-1	-1	-122
G.CCECCEE	---	1	-1	-1	-123
G.CCECECC	---	1	-1	-1	-124
G.CCECECE	---	1	-1	-1	-125
G.CCECEEC	---	1	-1	-1	-126
G.CCECEEE	---	1	-1	-1	-127
G.CCEECCC	---	1	-1	-1	-128
G.CCEECCE	---	1	-1	-1	-129
G.CCEECEC	---	1	-1	-1	-130
G.CCEECEE	---	1	-1	-1	-131
G.CCEEECC	---	1	-1	-1	-132
G.CCEEECE	---	1	-1	-1	-133
G.CCEEEEC	---	1	-1	-1	-134
G.CCEEEEE	---	1	-1	-1	-135
G.CECCCCC	---	1	-1	-1	-136
G.CECCCCE	---	1	-1	-1	-137
G.CECCCEC	---	1	-1	-1	-138
G.CECCCEE	---	1	-1	-1	-139
G.CECCECC	---	1	-1	-1	-140
G.CECCECE	---	1	-1	-1	-141
G.CECCEEC	---	1	-1	-1	-142
G.CECCEEE	---	1	-1	-1	-143
G.CECECCC	---	1	-1	-1	-144
G.CECECCE	---	1	-1	-1	-145
G.CECECEC	---	1	-1	-1	-146
G.CECECEE	---	1	-1	-1	-147
G.CECEECC	---	1	-1	-1	-148
G.CECEECE	---	1	-1	-1	-149
G.CECEEEC	---	1	-1	-1	-150
G.CECEEEE	---	1	-1	-1	-151
G.CEECCCC	---	1	-1	-1	-152
G.CEECCCE	---	1	-1	-1	-153
G.CEECCEC	---	1	-1	-1	-154
G.CEECCEE	---	1	-1	-1	-155
G.CEECECC	---	1	-1	-1	-156
G.CEECECE	---	1	-1	-1	-157
G.CEECEEC	---	1	-1	-1	-158
G.CEECEEE	---	1	-1	-1	-159
G.CEEECCC	---	1	-1	-1	-160
G.CEEECCE	---	1	-1	-1	-161
G.CEEECEC	---	1	-1	-1	-162
G.CEEECEE	---	1	-1	-1	-163
G.CEEEECC	---	1	-1	-1	-164
G.CEEEECE	---	1	-1	-1	-165
G.CEEEEEC	---	1	-1	-1	-166
G.CEEEEEE	---	1	-1	-1	-167
G.ECCCCCC	---	1	-1	-1	-168
G.ECCCCCE	---	1	-1	-1	-169
G.ECCCCEC	---	1	-1	-1	-170
G.ECCCCEE	---	1	-1	-1	-171
G.ECCCECC	---	1	-1	-1	-172
G.ECCCECE	---	1	-1	-1	-173
G.ECCCEEC	---	1	-1	-1	-174
G.ECCCEEE	---	1	-1	-1	-175
G.ECCECCC	---	1	-1	-1	-176
G.ECCECCE	---	1	-1	-1	-177
G.ECCECEC	---	1	-1	-1	-178
G.ECCECEE	---	1	-1	-1	-179
G.ECCEECC	---	1	-1	-1	-180
G.ECCEECE	---	1	-1	-1	-181
G.ECCEEEC	---	1	-1	-1	-182
G.ECCEEEE	---	1	-1	-1	-183
G.ECECCCC	---	1	-1	-1	-184
G.ECECCCE	---	1	-1	-1	-185
---	---	-1	-1	-1	-186
---	---	-1	-1	-1	-187
---	---	-1	-1	-1	-188
---	---	-1	-1	-1	-189
G.ECECEEC	---	1	-1	-1	-190
G.ECECEEE	---	1	-1	-1	-191
G.ECEECCC	---	1	-1	-1	-192
G.ECEECCE	---	1	-1	-1	-193
G.ECEECEC	---	1	-1	-1	-194
G.ECEECEE	---	1	-1	-1	-195
G.ECEEECC	---	1	-1	-1	-196
G.ECEEECE	---	1	-1	-1	-197
G.EECCCCC	---	1	-1	-1	-198
G.EECCCCE	---	1	-1	-1	-199
G.EECCCEC	---	1	-1	-1	-200
G.EECCCEE	---	1	-1	-1	-201
G.EECCECC	---	1	-1	-1	-202
G.EECCECE	---	1	-1	-1	-203
G.EECCEEC	---	1	-1	-1	-204
G.EECCEEE	---	1	-1	-1	-205
---	---	-1	-1	-1	-206
---	---	-1	-1	-1	-207
G.EECECEC	---	1	-1	-1	-208
G.EECECEE	---	1	-1	-1	-209
G.EECEECC	---	1	-1	-1	-210
G.EECEECE	---	1	-1	-1	-211
---	---	-1	-1	-1	-212
---	---	-1	-1	-1	-213
---	---	-1	-1	-1	-214
---	---	-1	-1	-1	-215
---	---	-1	-1	-1	-216
G.EEEECCC	---	1	-1	-1	-217
G.EEEECCE	---	1	-1	-1	-218
G.EEEECEC	---	1	-1	-1	-219
G.EEEECEE	---	1	-1	-1	-220
G.EEEEECC	---	1	-1	-1	-221
G.EEEEECE	---	1	-1	-1	-222
G.EEEEEEC	---	1	-1	-1	-223
G.EEEEEEE	---	1	-1	-1	-224

## Sheet: Ciona-C-elegans-comp-diff-code
CAST Code, Differentiation Code, C. intestinalis	CAST Code -- Composite Differentiation Code, C.elegans	C. intestinalis (match/gap)	C. elegans (match/gap)		SCORE
A.C	A.C	1	1	1	1
A.E	A.E	1	1	1	2
B.CC	B.CC	1	1	1	3
B.CE	B.CE	1	1	1	4
B.EC	B.EC	1	1	1	5
B.EE	B.EE	1	1	1	6
C.CCC	C.CCC	1	1	1	7
C.CCE	C.CCE	1	1	1	8
C.CEC	C.CEC	1	1	1	9
C.CEE	C.CEE	1	1	1	10
C.ECC	C.ECC	1	1	1	11
C.ECE	C.ECE	1	1	1	12
C.EEC	C.EEC	1	1	1	13
C.EEE	C.EEE	1	1	1	14
D.CCCC	D.CCCC	1	1	1	15
---	D.CCCE	-1	1	-1	14
D.CCEC	---	1	-1	-1	13
D.CCEC	D.CCEC	1	1	1	14
D.CCEE	D.CCEE	1	1	1	15
D.CECC	D.CECC	1	1	1	16
D.CECE	D.CECE	1	1	1	17
D.CEEC	D.CEEC	1	1	1	18
D.CEEE	D.CEEE	1	1	1	19
D.ECCC	D.ECCC	1	1	1	20
D.ECCE	D.ECCE	1	1	1	21
D.ECEC	D.ECEC	1	1	1	22
D.ECEE	D.ECEE	1	1	1	23
D.EECC	D.EECC	1	1	1	24
D.EECE	D.EECE	1	1	1	25
D.EEEC	D.EEEC	1	1	1	26
D.EEEE	D.EEEE	1	1	1	27
E.CCCCC	E.CCCCC	1	1	1	28
E.CCCCE	E.CCCCE	1	1	1	29
E.CCCEC	E.CCCEC	1	1	1	30
E.CCCEE	E.CCCEE	1	1	1	31
E.CCECC	---	1	-1	-1	30
E.CCECE	---	1	-1	-1	29
E.CCEEC	E.CCEEC	1	1	1	30
E.CCEEE	E.CCEEE	1	1	1	31
E.CECCC	E.CECCC	1	1	1	32
E.CECCE	E.CECCE	1	1	1	33
E.CECEC	E.CECEC	1	1	1	34
E.CECEE	E.CECEE	1	1	1	35
E.CEECC	E.CEECC	1	1	1	36
E.CEECE	E.CEECE	1	1	1	37
E.CEEEC	E.CEEEC	1	1	1	38
E.CEEEE	E.CEEEE	1	1	1	39
E.ECCCC	E.ECCCC	1	1	1	40
E.ECCCE	E.ECCCE	1	1	1	41
E.ECCEC	E.ECCEC	1	1	1	42
E.ECCEE	E.ECCEE	1	1	1	43
E.ECECC	E.ECECC	1	1	1	44
E.ECECE	E.ECECE	1	1	1	45
E.ECEEC	E.ECEEC	1	1	1	46
E.ECEEE	E.ECEEE	1	1	1	47
E.EECCC	E.EECCC	1	1	1	48
E.EECCE	E.EECCE	1	1	1	49
E.EECEC	E.EECEC	1	1	1	50
E.EECEE	E.EECEE	1	1	1	51
E.EEECC	E.EEECC	1	1	1	52
E.EEECE	E.EEECE	1	1	1	53
E.EEEEC	E.EEEEC	1	1	1	54
E.EEEEE	E.EEEEE	1	1	1	55
F.CCCCCC	F.CCCCCC	1	1	1	56
F.CCCCCE	F.CCCCCE	1	1	1	57
F.CCCCEC	F.CCCCEC	1	1	1	58
F.CCCCEE	F.CCCCEE	1	1	1	59
F.CCCECC	F.CCCECC	1	1	1	60
F.CCCECE	F.CCCECE	1	1	1	61
---	F.CCCEEC	-1	1	-1	60
F.CCCEEE	F.CCCEEE	1	1	1	61
F.CCECCC	---	1	-1	-1	60
F.CCECCE	---	1	-1	-1	59
F.CCECEC	---	1	-1	-1	58
F.CCECEE	---	1	-1	-1	57
F.CCECEEE	---	1	-1	-1	56
F.CCEECC	F.CCEECC	1	1	1	57
F.CCEECE	F.CCEECE	1	1	1	58
F.CCEEEC	F.CCEEEC	1	1	1	59
---	F.CCEEEE	-1	1	-1	58
F.CCEEEEC	---	1	-1	-1	57
F.CECCCC	F.CECCCC	1	1	1	58
F.CECCCE	F.CECCCE	1	1	1	59
F.CECCEC	F.CECCEC	1	1	1	60
F.CECCEE	F.CECCEE	1	1	1	61
F.CECECC	F.CECECC	1	1	1	62
F.CECECE	F.CECECE	1	1	1	63
---	F.CECEEC	-1	1	-1	62
F.CECEEE	F.CECEEE	1	1	1	63
F.CEECCC	F.CEECCC	1	1	1	64
F.CEECCE	F.CEECCE	1	1	1	65
F.CEECEC	F.CEECEC	1	1	1	66
F.CEECEE	F.CEECEE	1	1	1	67
F.CEECEEE	---	1	-1	-1	66
F.CEEECC	F.CEEECC	1	1	1	67
F.CEEECE	F.CEEECE	1	1	1	68
F.CEEEEC	F.CEEEEC	1	1	1	69
---	F.CEEEEE	-1	1	-1	68
F.CEEEEEC	---	1	-1	-1	67
F.ECCCCC	F.ECCCCC	1	1	1	68
F.ECCCCE	F.ECCCCE	1	1	1	69
F.ECCCEC	F.ECCCEC	1	1	1	70
F.ECCCEE	F.ECCCEE	1	1	1	71
F.ECCECC	F.ECCECC	1	1	1	72
F.ECCECE	F.ECCECE	1	1	1	73
---	F.ECCEEC	-1	1	-1	72
F.ECCEEE	F.ECCEEE	1	1	1	73
F.ECECCC	F.ECECCC	1	1	1	74
F.ECECCE	F.ECECCE	1	1	1	75
F.ECECEC	F.ECECEC	1	1	1	76
F.ECECEE	F.ECECEE	1	1	1	77
F.ECECEEE	---	1	-1	-1	76
F.ECEECC	F.ECEECC	1	1	1	77
F.ECEECE	F.ECEECE	1	1	1	78
F.ECEEEC	F.ECEEEC	1	1	1	79
---	F.ECEEEE	-1	1	-1	78
F.ECEEEEC	---	1	-1	-1	77
F.EECCCC	F.EECCCC	1	1	1	78
F.EECCCE	F.EECCCE	1	1	1	79
F.EECCEC	F.EECCEC	1	1	1	80
F.EECCEE	F.EECCEE	1	1	1	81
F.EECECC	F.EECECC	1	1	1	82
F.EECECE	F.EECECE	1	1	1	83
---	F.EECEEC	-1	1	-1	82
F.EECEEE	F.EECEEE	1	1	1	83
F.EEECCC	F.EEECCC	1	1	1	84
F.EEECCE	F.EEECCE	1	1	1	85
F.EEECEC	F.EEECEC	1	1	1	86
F.EEECEE	F.EEECEE	1	1	1	87
F.EEECEEE	---	1	-1	-1	86
F.EEEECC	F.EEEECC	1	1	1	87
F.EEEECE	F.EEEECE	1	1	1	88
F.EEEEEC	F.EEEEEC	1	1	1	89
F.EEEEEEC	---	1	-1	-1	88
---	F.EEEEEE	-1	1	-1	87
G.CCCCCCC	G.CCCCCCC	1	1	1	88
G.CCCCCCE	G.CCCCCCE	1	1	1	89
G.CCCCCEC	G.CCCCCEC	1	1	1	90
G.CCCCCEE	G.CCCCCEE	1	1	1	91
---	G.CCCCECC	-1	1	-1	90
---	G.CCCCECE	-1	1	-1	89
---	G.CCCCEEC	-1	1	-1	88
---	G.CCCCEEE	-1	1	-1	87
G.CCCECCC	---	1	-1	-1	86
G.CCCECCE	---	1	-1	-1	85
G.CCCECEC	G.CCCECEC	1	1	1	86
G.CCCECEE	G.CCCECEE	1	1	1	87
G.CCCEEC	---	1	-1	-1	86
---	G.CCCEECC	-1	1	-1	85
---	G.CCCEECE	-1	1	-1	84
G.CCECCCC		1	1	1	85
G.CCECCCE		1	1	1	86
G.CCECCEC		1	1	1	87
G.CCECCEE		1	1	1	88
G.CCECECC		1	1	1	89
G.CCECECE		1	1	1	90
G.CCEECCC	G.CCEECCC	1	1	1	91
G.CCEECCE	G.CCEECCE	1	1	1	92
G.CCEECEC	G.CCEECEC	1	1	1	93
G.CCEECEE	G.CCEECEE	1	1	1	94
G.CCEEECC	G.CCEEECC	1	1	1	95
G.CCEEECE	G.CCEEECE	1	1	1	96
---	G.CCEEEEC	-1	1	-1	95
---	G.CCEEEEE	-1	1	-1	94
G.CECCCCC	G.CECCCCC	1	1	1	95
G.CECCCCE	G.CECCCCE	1	1	1	96
G.CECCCEC	G.CECCCEC	1	1	1	97
G.CECCCEE	G.CECCCEE	1	1	1	98
---	G.CECCECC	-1	1	-1	97
G.CECCECE	G.CECCECE	1	1	1	98
---	G.CECCEEC	-1	1	-1	97
---	G.CECCEEE	-1	1	-1	96
G.CECECCC	G.CECECCC	1	1	1	97
G.CECECCE	G.CECECCE	1	1	1	98
G.CECECEC	G.CECECEC	1	1	1	99
G.CECECEE	G.CECECEE	1	1	1	100
G.CECEECC	G.CECEECC	1	1	1	101
---	G.CECEECE	-1	1	-1	100
---	G.CECEEEC	-1	1	-1	99
---	G.CECEEEE	-1	1	-1	98
G.CEECCCC	G.CEECCCC	1	1	1	99
G.CEECCCE	G.CEECCCE	1	1	1	100
G.CEECCEC	---	1	-1	-1	99
---	G.CEECEEC	-1	1	-1	98
G.CEECCEE	---	1	-1	-1	97
---	G.CEECEEE	-1	1	-1	96
G.CEECECE	---	1	-1	-1	95
G.CEEECCC	G.CEEECCC	1	1	1	96
G.CEEECCE	G.CEEECCE	1	1	1	97
G.CEEECEC	G.CEEECEC	1	1	1	98
G.CEEECEE	G.CEEECEE	1	1	1	99
G.CEEEECC	G.CEEEECC	1	1	1	100
G.CEEEECE	G.CEEEECE	1	1	1	101
G.ECCCCCC	G.ECCCCCC	1	1	1	102
G.ECCCCCE	G.ECCCCCE	1	1	1	103
G.ECCCCEC	G.ECCCCEC	1	1	1	104
G.ECCCCEE	G.ECCCCEE	1	1	1	105
---	G.ECCCECC	-1	1	-1	104
---	G.ECCCECE	-1	1	-1	103
---	G.ECCCEEC	-1	1	-1	102
---	G.ECCCEEE	-1	1	-1	101
G.ECCECCC	G.ECCECCC	1	1	1	102
G.ECCECCE	G.ECCECCE	1	1	1	103
G.ECCECEC	G.ECCECEC	1	1	1	104
G.ECCECEE	G.ECCECEE	1	1	1	105
---	G.ECCEECC	-1	1	-1	104
---	G.ECCEECE	-1	1	-1	103
---	G.ECCEEEC	-1	1	-1	102
---	G.ECCEEEE	-1	1	-1	101
G.ECECCCC	G.ECECCCC	1	1	1	102
G.ECECCCE	G.ECECCCE	1	1	1	103
G.ECECCEC	G.ECECCEC	1	1	1	104
G.ECECCEE	G.ECECCEE	1	1	1	105
G.ECECECC	G.ECECECC	1	1	1	106
G.ECECECE	G.ECECECE	1	1	1	107
---	G.ECECEEC	-1	1	-1	106
---	G.ECECEEE	-1	1	-1	105
G.ECEECCC	G.ECEECCC	1	1	1	106
G.ECEECCE	G.ECEECCE	1	1	1	107
G.ECEECEC	G.ECEECEC	1	1	1	108
G.ECEECEE	G.ECEECEE	1	1	1	109
G.ECEEECC	G.ECEEECC	1	1	1	110
G.ECEEECE	G.ECEEECE	1	1	1	111
---	G.ECEEEEC	-1	1	-1	110
---	G.ECEEEEE	-1	1	-1	109
G.EECCCCC	G.EECCCCC	1	1	1	110
G.EECCCCE	G.EECCCCE	1	1	1	111
G.EECCCEC	G.EECCCEC	1	1	1	112
G.EECCCEE	G.EECCCEE	1	1	1	113
---	G.EECCECC	-1	1	-1	112
G.EECCECE	G.EECCECE	1	1	1	113
---	G.EECCEEC	-1	1	-1	112
---	G.EECCEEE	-1	1	-1	111
G.EECECCC	G.EECECCC	1	1	1	112
G.EECECCE	G.EECECCE	1	1	1	113
G.EECECEC	G.EECECEC	1	1	1	114
G.EECECEE	G.EECECEE	1	1	1	115
G.EECEECC	G.EECEECC	1	1	1	116
---	G.EECEECE	-1	1	-1	115
---	G.EECEEEC	-1	1	-1	114
---	G.EECEEEE	-1	1	-1	113
G.EEECCCC	G.EEECCCC	1	1	1	114
G.EEECCCE	G.EEECCCE	1	1	1	115
G.EEECCEC	G.EEECCEC	1	1	1	116
G.EEECCEE	G.EEECCEE	1	1	1	117
---	G.EEECECC	-1	1	-1	116
G.EEECECE	G.EEECECE	1	1	1	117
---	G.EEECEEC	-1	1	-1	116
---	G.EEECEEE	-1	1	-1	115
G.EEEECCC	G.EEEECCC	1	1	1	116
G.EEEECCE	G.EEEECCE	1	1	1	117
G.EEEECEC	G.EEEECEC	1	1	1	118
G.EEEECEE	G.EEEECEE	1	1	1	119
G.EEEEECC	G.EEEEECC	1	1	1	120
G.EEEEECE	G.EEEEECE	1	1	1	121
---	G.EEEEEEC	-1	1	-1	120
---	G.EEEEEEE

## Sheet: Axol-C-elega-comp-diff-code
CAST Code -- Composite Differentiation Code, C. elegans	CAST Code, Differentiation Code, Axolotl	C. elegans (match/gap)	Axolotl (match/gap)		SCORE
A.C	A.C	1	1	1	1
A.E	A.E	1	1	1	2
B.CC	B.CC	1	1	1	3
B.CE	---	1	-1	-1	2
B.EC	B.EC	1	1	1	3
B.EE	B.EE	1	1	1	4
C.CCC	C.CCC	1	1	1	5
C.CCE	C.CCE	1	1	1	6
C.CEC	---	1	-1	-1	5
C.CEE	---	1	-1	-1	4
C.ECC	---	1	-1	-1	3
C.ECE	C.ECE	1	1	1	4
C.EEC	C.EEC	1	1	1	5
C.EEE	C.EEE	1	1	1	6
D.CCCC	---	1	-1	-1	5
D.CCCE	---	1	-1	-1	4
D.CCEC	D.CCEC	1	1	1	5
D.CCEE	---	1	-1	-1	4
D.CECC	---	1	-1	-1	3
D.CECE	---	1	-1	-1	2
D.CEEC	---	1	-1	-1	1
D.CEEE	---	1	-1	-1	0
D.ECCC	---	1	-1	-1	-1
D.ECCE	---	1	-1	-1	-2
D.ECEC	D.ECEC	1	1	1	-1
D.ECEE	D.ECEE	1	1	1	0
D.EECC	---	1	-1	-1	-1
D.EECE	---	1	-1	-1	-2
D.EEEC	---	1	-1	-1	-3
D.EEEE	---	1	-1	-1	-4
E.CCCCC	---	1	-1	-1	-5
E.CCCCE	---	1	-1	-1	-6
E.CCCEC	---	1	-1	-1	-7
E.CCCEE	---	1	-1	-1	-8
E.CCEEC	---	1	-1	-1	-9
E.CCEEE	---	1	-1	-1	-10
E.CECCC	---	1	-1	-1	-11
E.CECCE	---	1	-1	-1	-12
E.CECEC	---	1	-1	-1	-13
E.CECEE	---	1	-1	-1	-14
E.CEECC	---	1	-1	-1	-15
E.CEECE	---	1	-1	-1	-16
E.CEEEC	---	1	-1	-1	-17
E.CEEEE	---	1	-1	-1	-18
E.ECCCC	---	1	-1	-1	-19
E.ECCCE	---	1	-1	-1	-20
E.ECCEC	---	1	-1	-1	-21
E.ECCEE	---	1	-1	-1	-22
E.ECECC	E.ECECC	1	1	1	-21
E.ECECE	E.ECECE	1	1	1	-20
E.ECEEC	---	1	-1	-1	-21
E.ECEEE	---	1	-1	-1	-22
E.EECCC	---	1	-1	-1	-23
E.EECCE	---	1	-1	-1	-24
E.EECEC	---	1	-1	-1	-25
E.EECEE	---	1	-1	-1	-26
E.EEECC	---	1	-1	-1	-27
E.EEECE	---	1	-1	-1	-28
E.EEEEC	---	1	-1	-1	-29
E.EEEEE	---	1	-1	-1	-30
F.CCCCCC	---	1	-1	-1	-31
F.CCCCCE	---	1	-1	-1	-32
F.CCCCEC	---	1	-1	-1	-33
F.CCCCEE	---	1	-1	-1	-34
F.CCCECC	---	1	-1	-1	-35
F.CCCECE	---	1	-1	-1	-36
F.CCCEEC	---	1	-1	-1	-37
F.CCCEEE	---	1	-1	-1	-38
F.CCEECC	---	1	-1	-1	-39
F.CCEECE	---	1	-1	-1	-40
F.CCEEEC	---	1	-1	-1	-41
F.CCEEEE	---	1	-1	-1	-42
F.CECCCC	---	1	-1	-1	-43
F.CECCCE	---	1	-1	-1	-44
F.CECCEC	---	1	-1	-1	-45
F.CECCEE	---	1	-1	-1	-46
F.CECECC	---	1	-1	-1	-47
F.CECECE	---	1	-1	-1	-48
F.CECEEC	---	1	-1	-1	-49
F.CECEEE	---	1	-1	-1	-50
F.CEECCC	---	1	-1	-1	-51
F.CEECCE	---	1	-1	-1	-52
F.CEECEC	---	1	-1	-1	-53
F.CEECEE	---	1	-1	-1	-54
F.CEEECC	---	1	-1	-1	-55
F.CEEECE	---	1	-1	-1	-56
F.CEEEEC	---	1	-1	-1	-57
F.CEEEEE	---	1	-1	-1	-58
F.ECCCCC	---	1	-1	-1	-59
F.ECCCCE	---	1	-1	-1	-60
F.ECCCEC	---	1	-1	-1	-61
F.ECCCEE	---	1	-1	-1	-62
F.ECCECC	---	1	-1	-1	-63
F.ECCECE	---	1	-1	-1	-64
F.ECCEEC	---	1	-1	-1	-65
F.ECCEEE	---	1	-1	-1	-66
F.ECECCC	---	1	-1	-1	-67
F.ECECCE	---	1	-1	-1	-68
F.ECECEC	F.ECECEC	1	1	1	-67
F.ECECEE	---	1	-1	-1	-68
F.ECEECC	---	1	-1	-1	-69
F.ECEECE	---	1	-1	-1	-70
F.ECEEEC	---	1	-1	-1	-71
F.ECEEEE	---	1	-1	-1	-72
F.EECCCC	---	1	-1	-1	-73
F.EECCCE	---	1	-1	-1	-74
F.EECCEC	---	1	-1	-1	-75
F.EECCEE	---	1	-1	-1	-76
F.EECECC	---	1	-1	-1	-77
F.EECECE	---	1	-1	-1	-78
F.EECEEC	---	1	-1	-1	-79
F.EECEEE	---	1	-1	-1	-80
F.EEECCC	---	1	-1	-1	-81
F.EEECCE	---	1	-1	-1	-82
F.EEECEC	---	1	-1	-1	-83
F.EEECEE	---	1	-1	-1	-84
F.EEEECC	---	1	-1	-1	-85
F.EEEECE	---	1	-1	-1	-86
F.EEEEEC	---	1	-1	-1	-87
F.EEEEEE	---	1	-1	-1	-88
G.CCCCCCC	---	1	-1	-1	-89
G.CCCCCCE	---	1	-1	-1	-90
G.CCCCCEC	---	1	-1	-1	-91
G.CCCCCEE	---	1	-1	-1	-92
G.CCCCECC	---	1	-1	-1	-93
G.CCCCECE	---	1	-1	-1	-94
G.CCCCEEC	---	1	-1	-1	-95
G.CCCCEEE	---	1	-1	-1	-96
G.CCCECEC	---	1	-1	-1	-97
G.CCCECEE	---	1	-1	-1	-98
G.CCCEECC	---	1	-1	-1	-99
G.CCCEECE	---	1	-1	-1	-100
G.CCEECCC	---	1	-1	-1	-101
G.CCEECCE	---	1	-1	-1	-102
G.CCEECEC	---	1	-1	-1	-103
G.CCEECEE	---	1	-1	-1	-104
G.CCEEECC	---	1	-1	-1	-105
G.CCEEECE	---	1	-1	-1	-106
G.CCEEEEC	---	1	-1	-1	-107
G.CCEEEEE	---	1	-1	-1	-108
G.CECCCCC	---	1	-1	-1	-109
G.CECCCCE	---	1	-1	-1	-110
G.CECCCEC	---	1	-1	-1	-111
G.CECCCEE	---	1	-1	-1	-112
G.CECCECC	---	1	-1	-1	-113
G.CECCECE	---	1	-1	-1	-114
G.CECCEEC	---	1	-1	-1	-115
G.CECCEEE	---	1	-1	-1	-116
G.CECECCC	---	1	-1	-1	-117
G.CECECCE	---	1	-1	-1	-118
G.CECECEC	---	1	-1	-1	-119
G.CECECEE	---	1	-1	-1	-120
G.CECEECC	---	1	-1	-1	-121
G.CECEECE	---	1	-1	-1	-122
G.CECEEEC	---	1	-1	-1	-123
G.CECEEEE	---	1	-1	-1	-124
G.CEECCCC	---	1	-1	-1	-125
G.CEECCCE	---	1	-1	-1	-126
G.CEECEEC	---	1	-1	-1	-127
G.CEECEEE	---	1	-1	-1	-128
G.CEEECCC	---	1	-1	-1	-129
G.CEEECCE	---	1	-1	-1	-130
G.CEEECEC	---	1	-1	-1	-131
G.CEEECEE	---	1	-1	-1	-132
G.CEEEECC	---	1	-1	-1	-133
G.CEEEECE	---	1	-1	-1	-134
G.ECCCCCC	---	1	-1	-1	-135
G.ECCCCCE	---	1	-1	-1	-136
G.ECCCCEC	---	1	-1	-1	-137
G.ECCCCEE	---	1	-1	-1	-138
G.ECCCECC	---	1	-1	-1	-139
G.ECCCECE	---	1	-1	-1	-140
G.ECCCEEC	---	1	-1	-1	-141
G.ECCCEEE	---	1	-1	-1	-142
G.ECCECCC	---	1	-1	-1	-143
G.ECCECCE	---	1	-1	-1	-144
G.ECCECEC	---	1	-1	-1	-145
G.ECCECEE	---	1	-1	-1	-146
G.ECCEECC	---	1	-1	-1	-147
G.ECCEECE	---	1	-1	-1	-148
G.ECCEEEC	---	1	-1	-1	-149
G.ECCEEEE	---	1	-1	-1	-150
G.ECECCCC	---	1	-1	-1	-151
G.ECECCCE	---	1	-1	-1	-152
G.ECECCEC	---	1	-1	-1	-153
G.ECECCEE	---	1	-1	-1	-154
G.ECECECC	---	1	-1	-1	-155
G.ECECECE	---	1	-1	-1	-156
G.ECECEEC	---	1	-1	-1	-157
G.ECECEEE	---	1	-1	-1	-158
G.ECEECCC	---	1	-1	-1	-159
G.ECEECCE	---	1	-1	-1	-160
G.ECEECEC	---	1	-1	-1	-161
G.ECEECEE	---	1	-1	-1	-162
G.ECEEECC	---	1	-1	-1	-163
G.ECEEECE	---	1	-1	-1	-164
G.ECEEEEC	---	1	-1	-1	-165
G.ECEEEEE	---	1	-1	-1	-166
G.EECCCCC	---	1	-1	-1	-167
G.EECCCCE	---	1	-1	-1	-168
G.EECCCEC	---	1	-1	-1	-169
G.EECCCEE	---	1	-1	-1	-170
G.EECCECC	---	1	-1	-1	-171
G.EECCECE	---	1	-1	-1	-172
G.EECCEEC	---	1	-1	-1	-173
G.EECCEEE	---	1	-1	-1	-174
G.EECECCC	---	1	-1	-1	-175
G.EECECCE	---	1	-1	-1	-176
G.EECECEC	---	1	-1	-1	-177
G.EECECEE	---	1	-1	-1	-178
G.EECEECC	---	1	-1	-1	-179
G.EECEECE	---	1	-1	-1	-180
G.EECEEEC	---	1	-1	-1	-181
G.EECEEEE	---	1	-1	-1	-182
G.EEECCCC	---	1	-1	-1	-183
G.EEECCCE	---	1	-1	-1	-184
G.EEECCEC	---	1	-1	-1	-185
G.EEECCEE	---	1	-1	-1	-186
G.EEECECC	---	1	-1	-1	-187
G.EEECECE	---	1	-1	-1	-188
G.EEECEEC	---	1	-1	-1	-189
G.EEECEEE	---	1	-1	-1	-190
G.EEEECCC	---	1	-1	-1	-191
G.EEEECCE	---	1	-1	-1	-192
G.EEEECEC	---	1	-1	-1	-193
G.EEEECEE	---	1	-1	-1	-194
G.EEEEECC	---	1	-1	-1	-195
G.EEEEECE	---	1	-1	-1	-196
G.EEEEEEC	---	1	-1	-1	-197
G.EEEEEEE	---	1	-1	-1	-198

## Sheet: Summary Stats
	Number of Levels	Length of Alignment	Alignment score
Ciona Intestinalis/C.elegans	7	256	128
Ciona Intestinalis/C.elegans*	7	257	120
Axolotl/Ciona Intestinalis (full)	6	104	-72
Axolotl/Ciona Intestinalis	3	14	6
Axolotl/C.elegans (full)	6	110	-77
Axolotl/C.elegans	3	14	6
Axolotl/C.elegans* (full)	6	99	-67
Axolotl/C.elegans*	3	14	6
